# Supplementary material for: Mass Spectrometry–Based Lipidomics of Oral Squamous Cell Carcinoma Tissue Reveals Aberrant Cholesterol and Glycerophospholipid Metabolism — A Pilot Study
Source: PubMed Central journal article supplement — Transl Oncol. 2020 Jun 16;13(10):100807. doi: 10.1016/j.tranon.2020.100807 (PMC7303674; doi:10.1016/j.tranon.2020.100807), 2020-06-16
Supplement: mmc7.pdf [file mmc7.pdf]

## Glycerolipids

## Sphingolipids

## Glycerophospholipids

## Glycerophospholipid derivatives - Lysoglycerophospholipids

## Sterols

### Triacylglycerol (TAG)

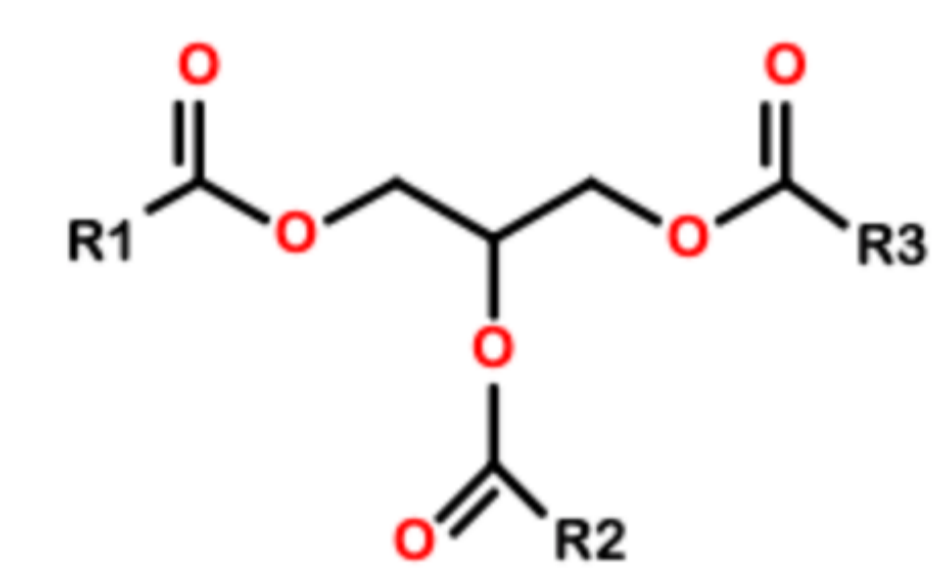

### Diacylglycerols (DAG)

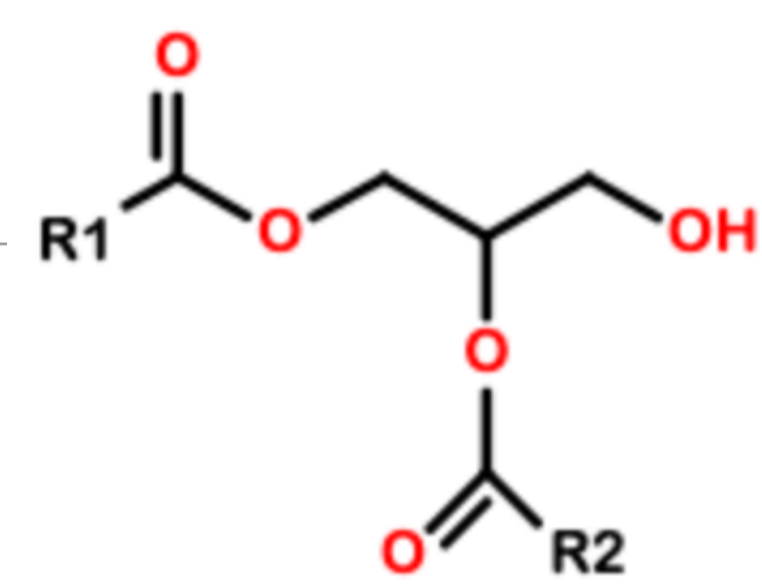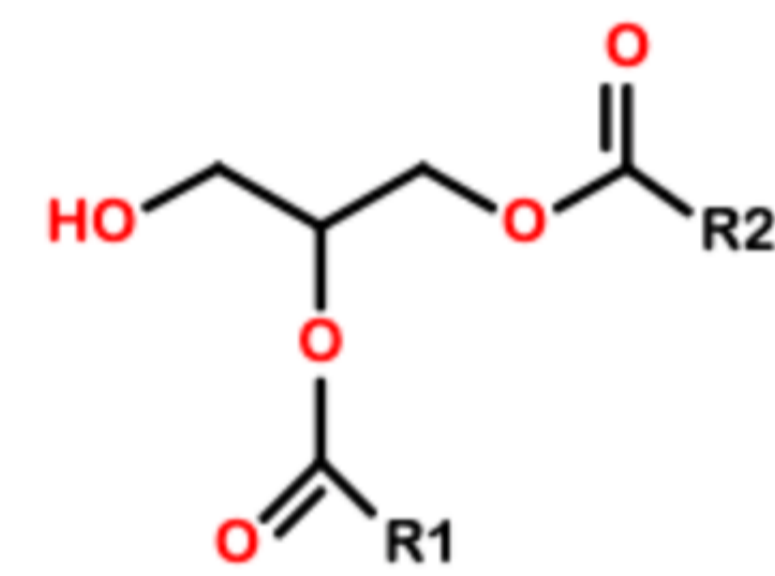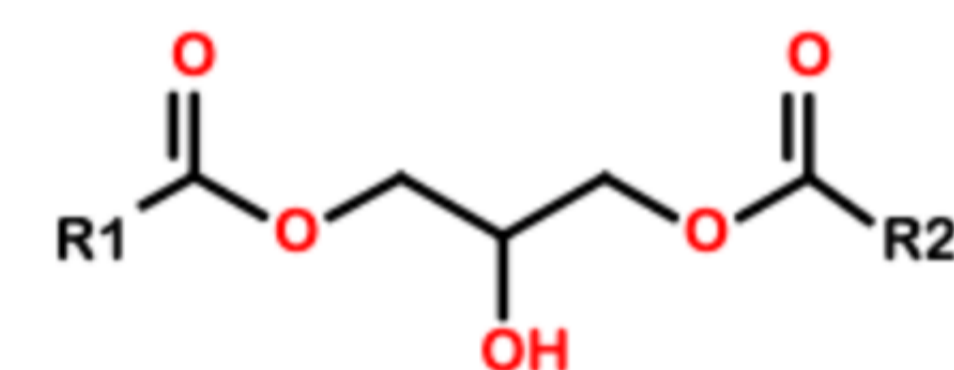

### Ceramide (CER)

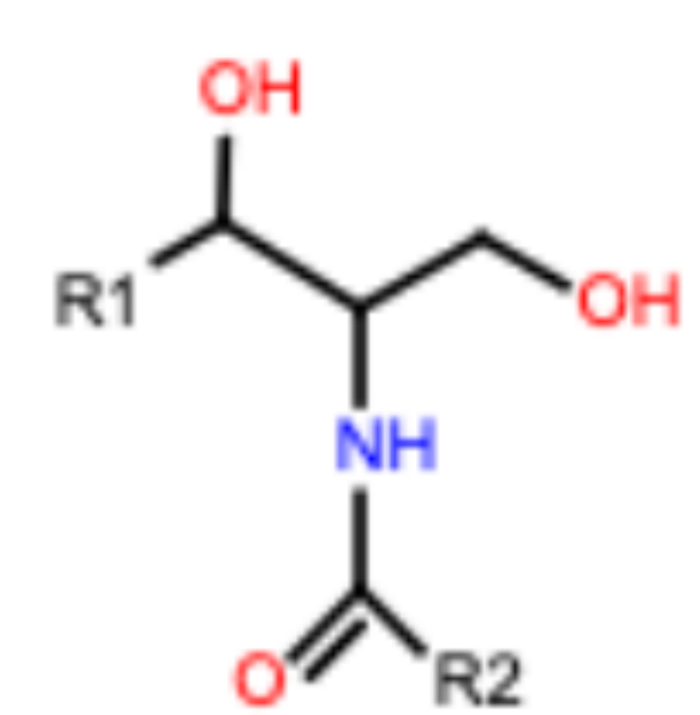

### Hexosylceramide (HEXCER)

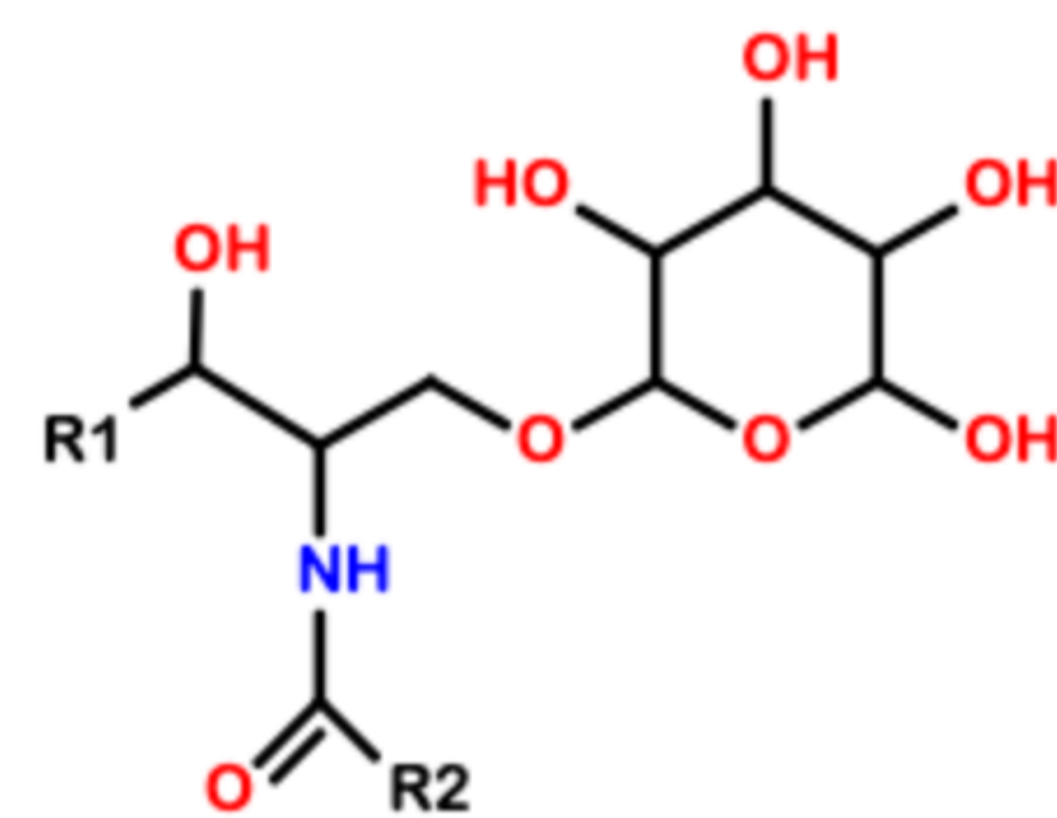

### Sphingomyelin (SM)

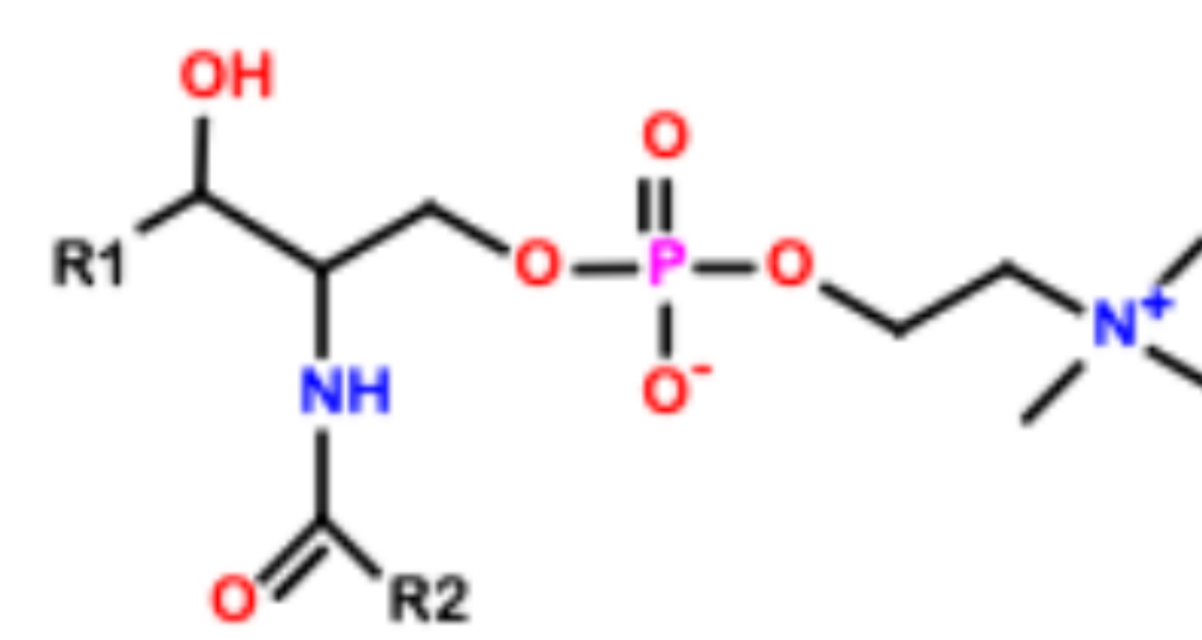

### Glycerophospho- glycerophosphoglycerols

### Cardiolipin (CL)

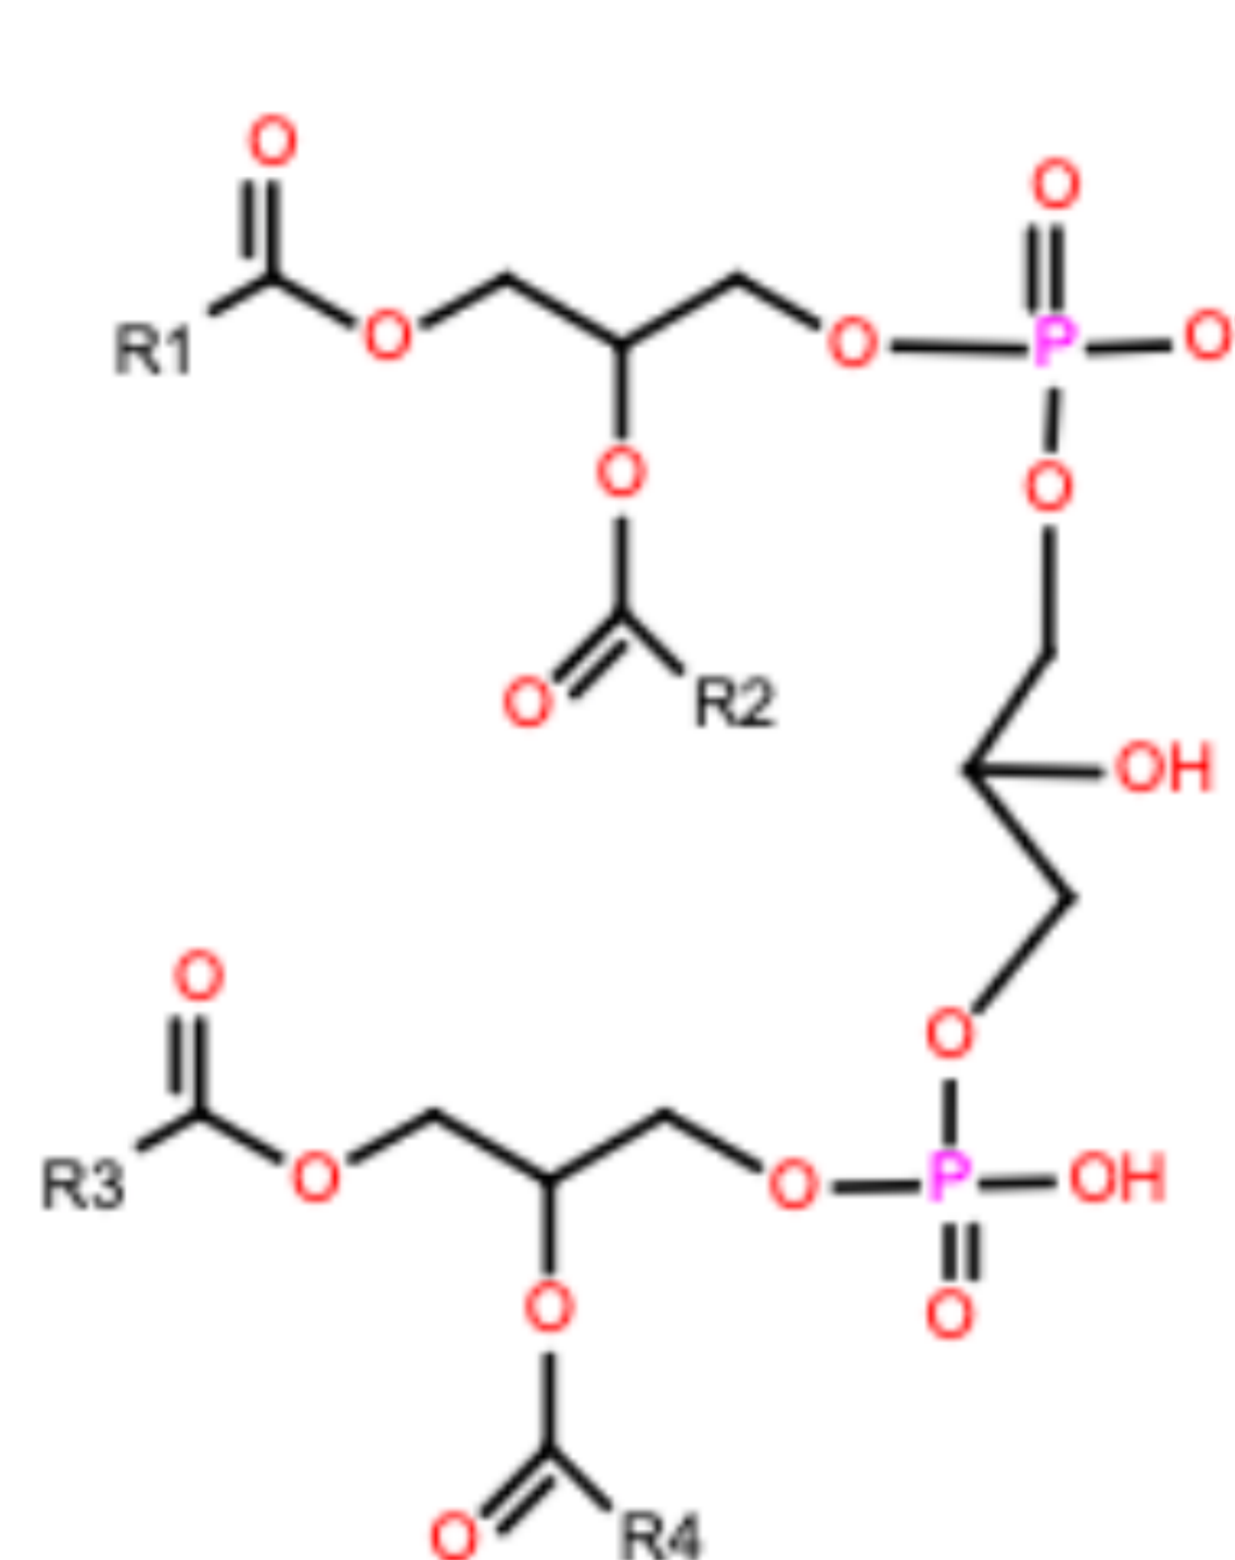

### Phosphatidylethanolamine ether (PE O-)

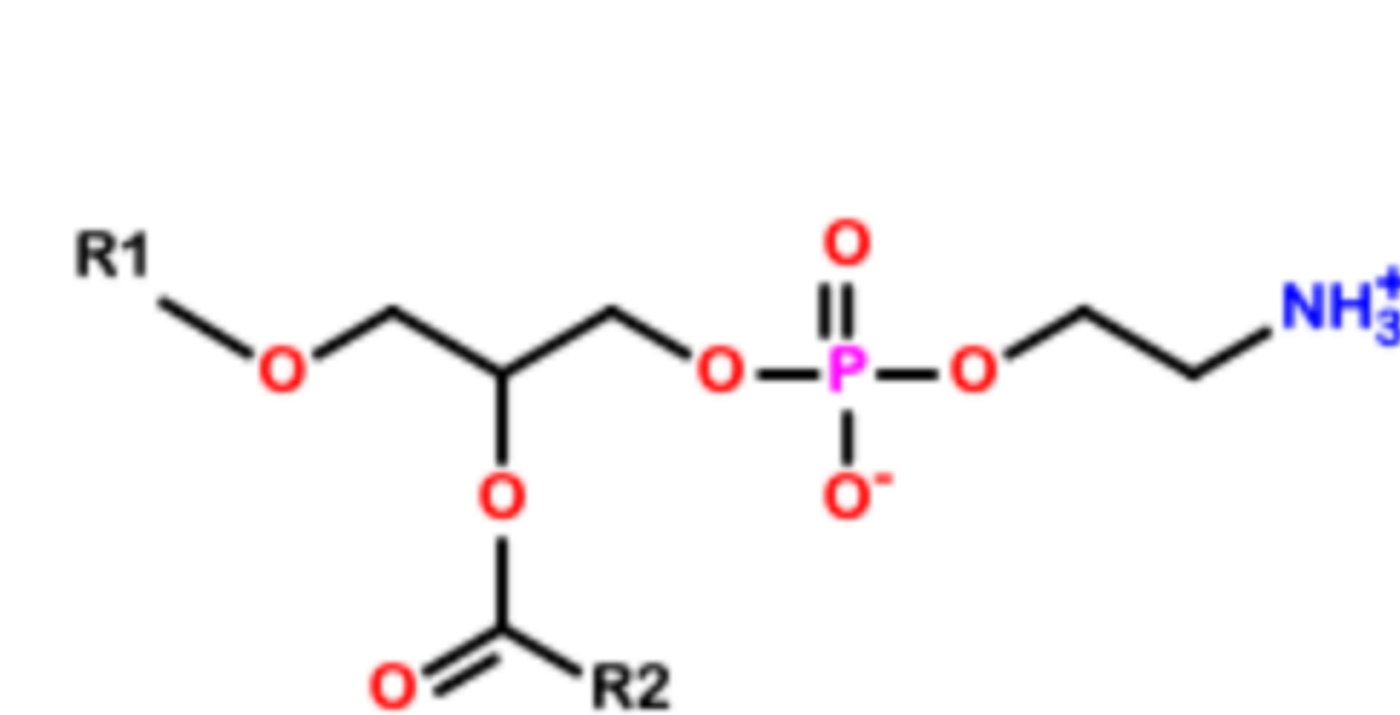

### Phosphatidylcholine ether (PC O-)

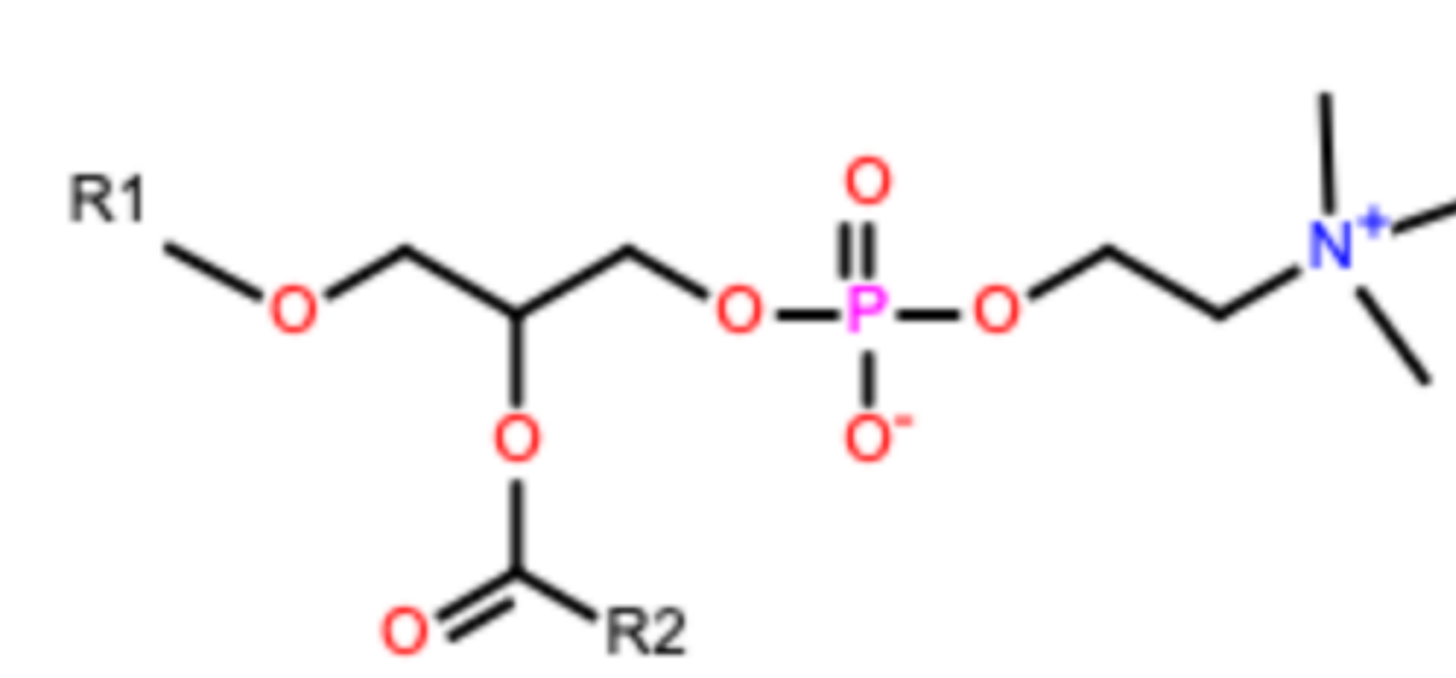

### Phosphatidylethanolamine (PE)

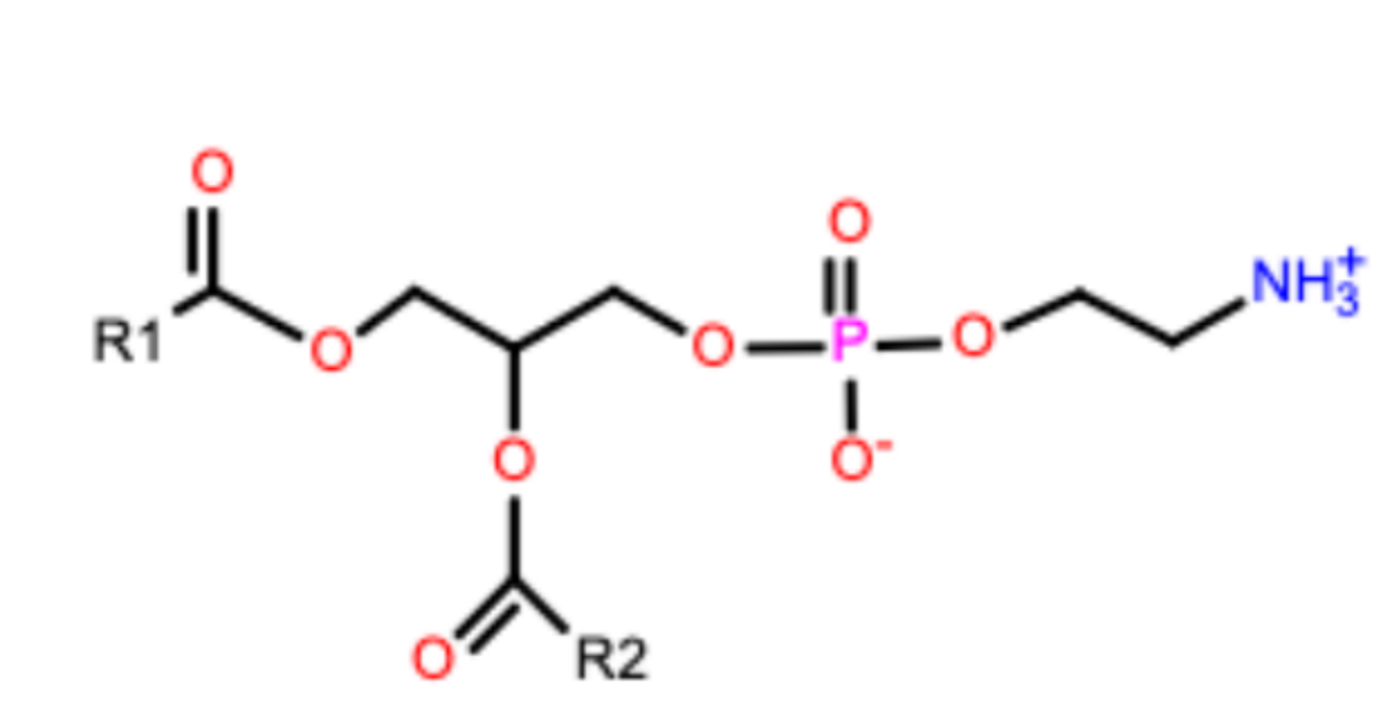

### Phosphatidylcholine (PC)

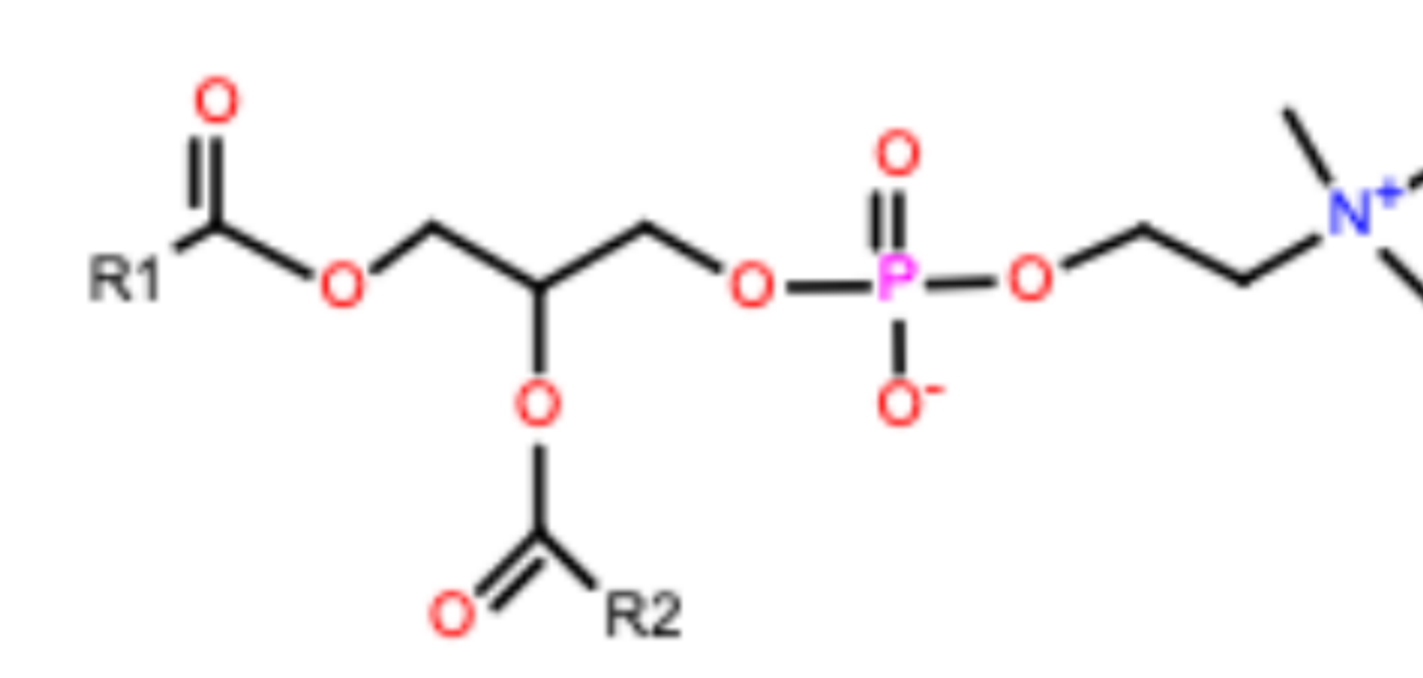

### Phosphatidylinositol (PI)

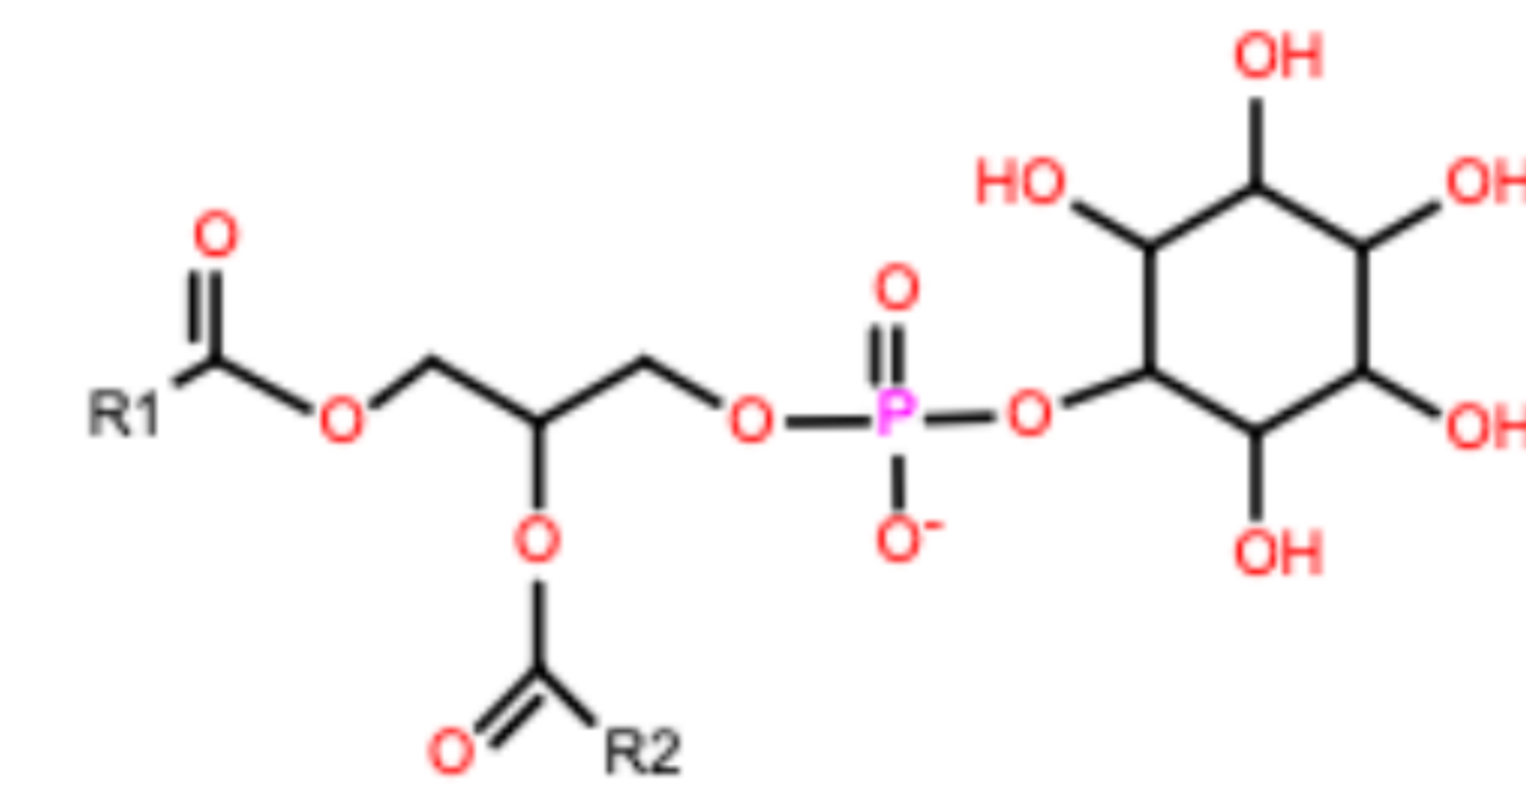

### Phosphatidic acid (PA)

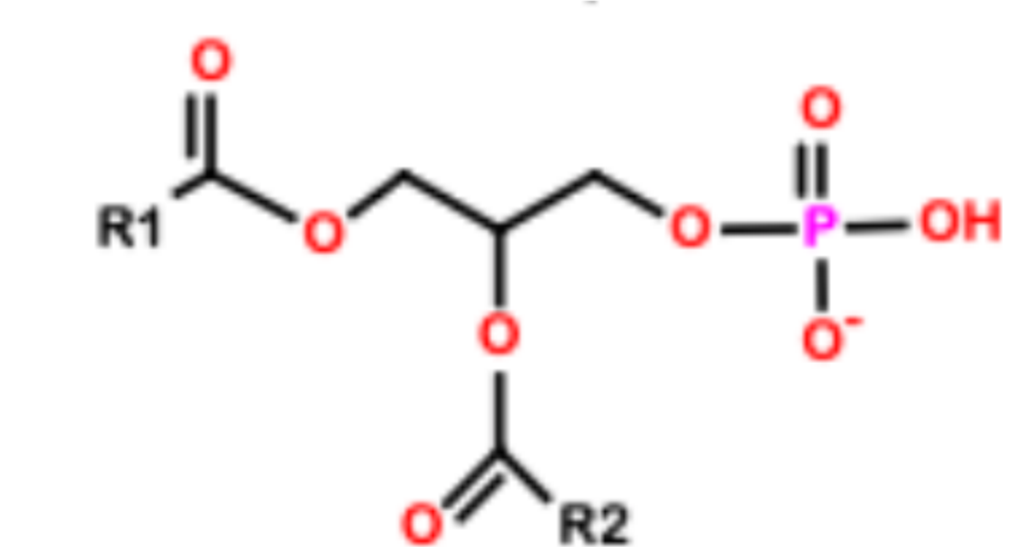

### Phosphatidylserine (PS)

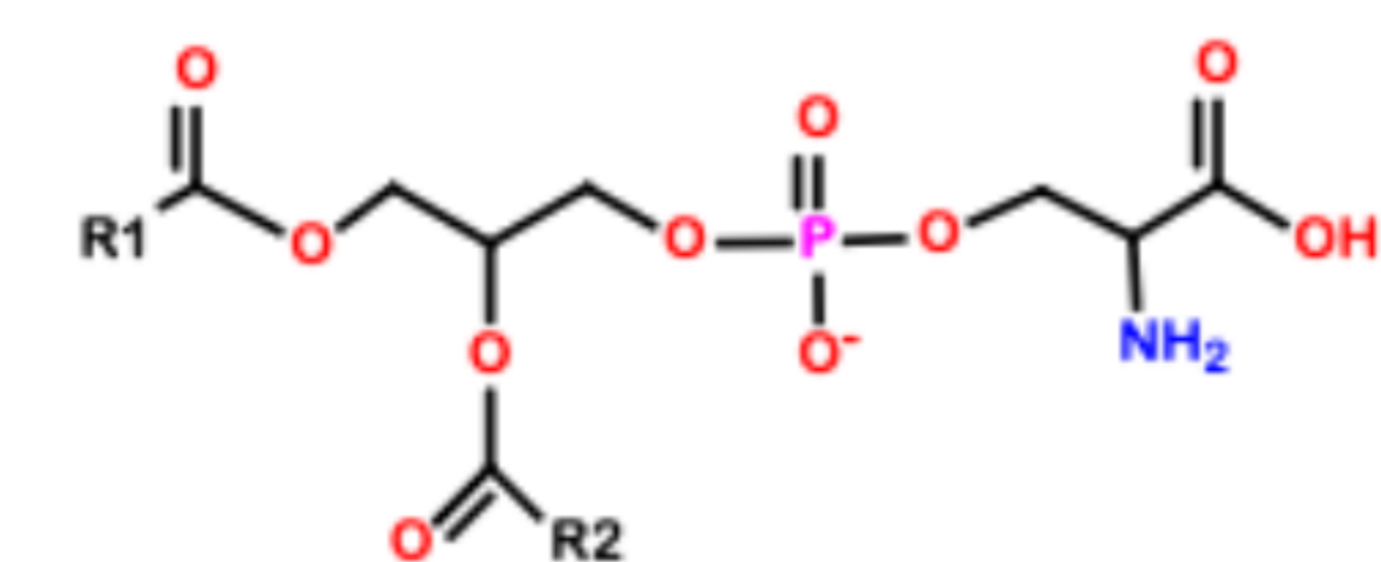

### Phosphatidylglycerol (PG)

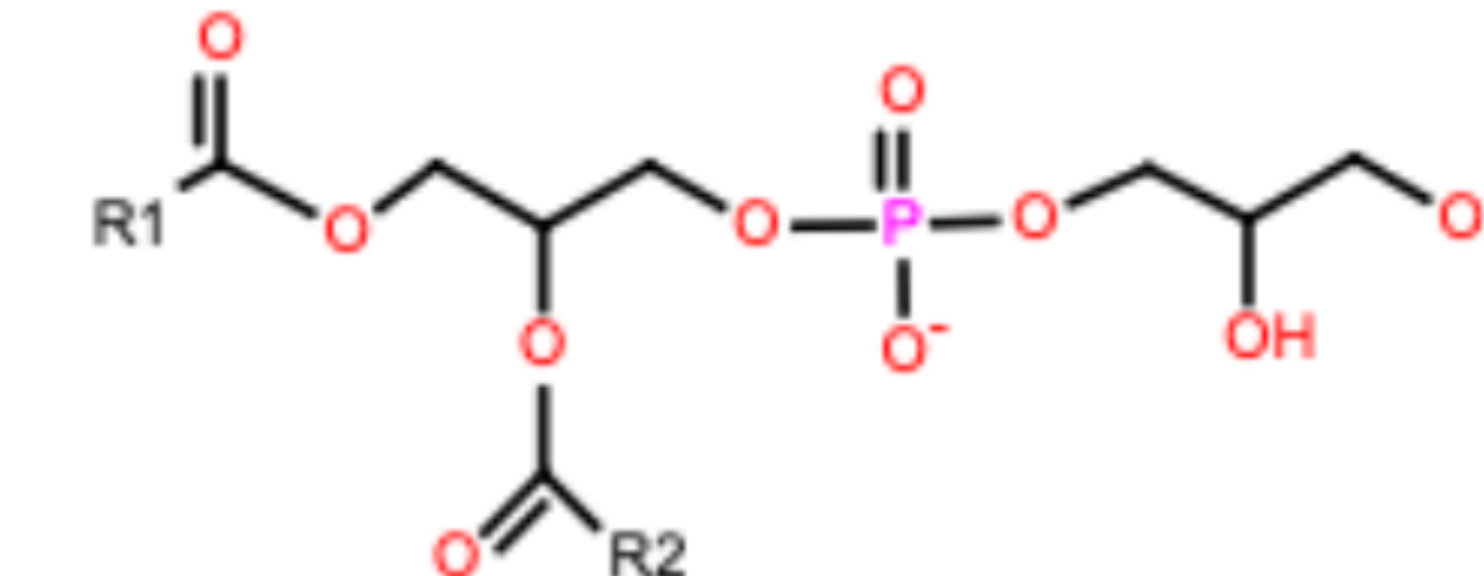

### Lyso- phosphatidylethanolamine (LPE)

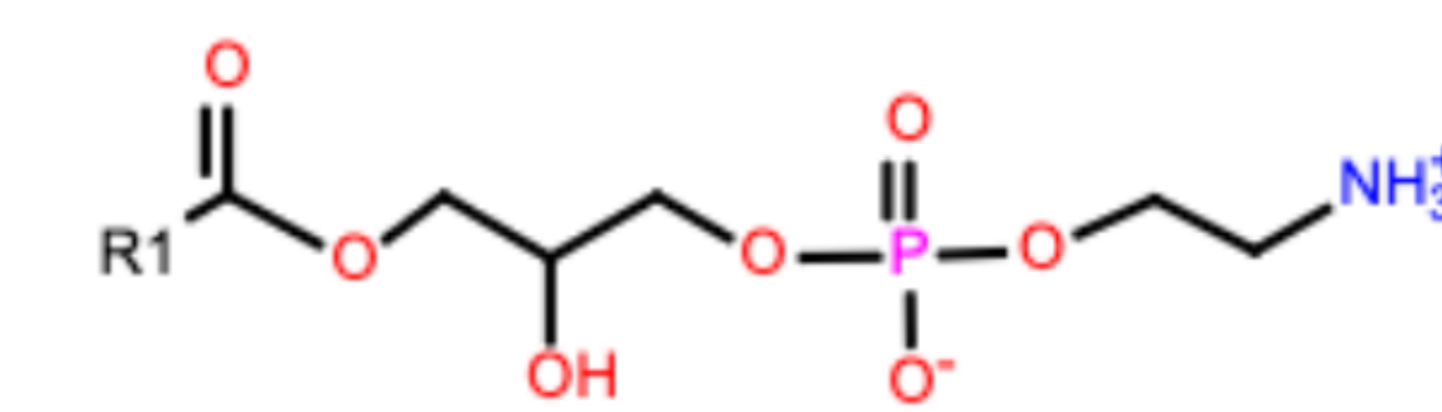

### Lyso- phosphatidylethanolamine ether (LPE O-)

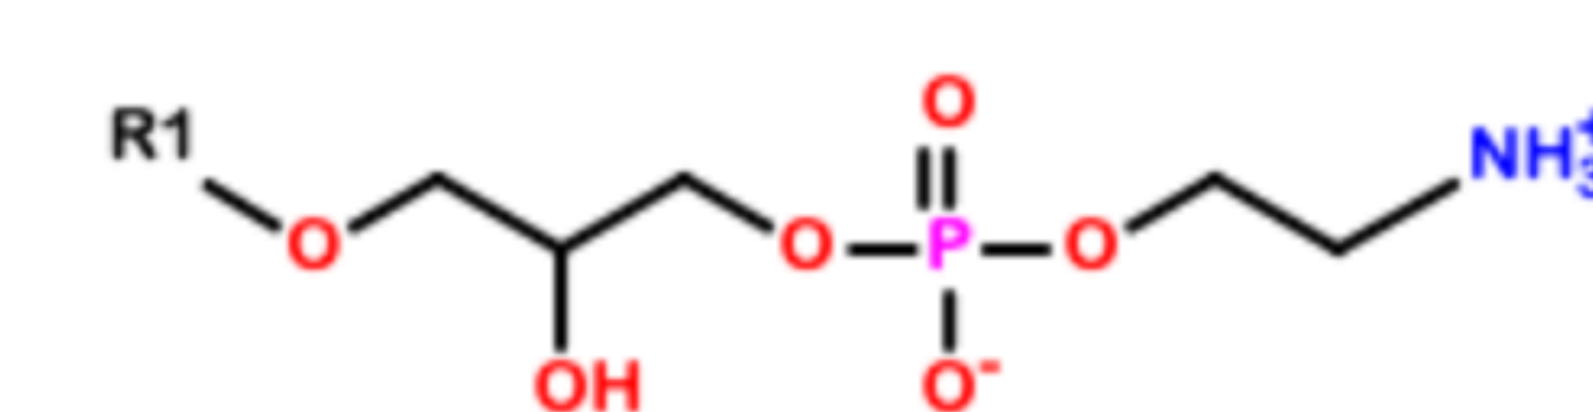

### Lyso- phosphatidylcholine (LPC)

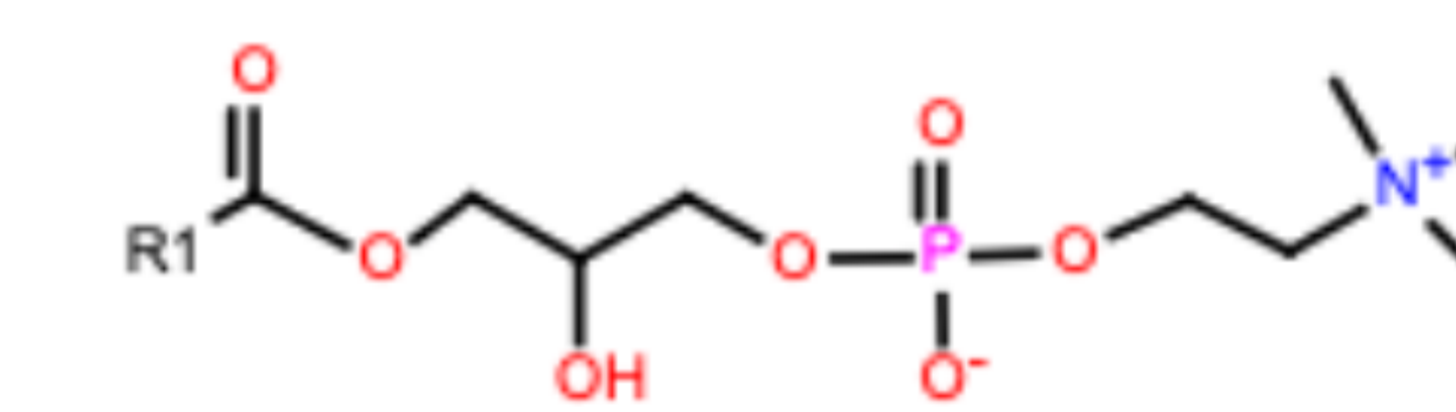

### Lyso- phosphatidylcholine ether (LPC O-)

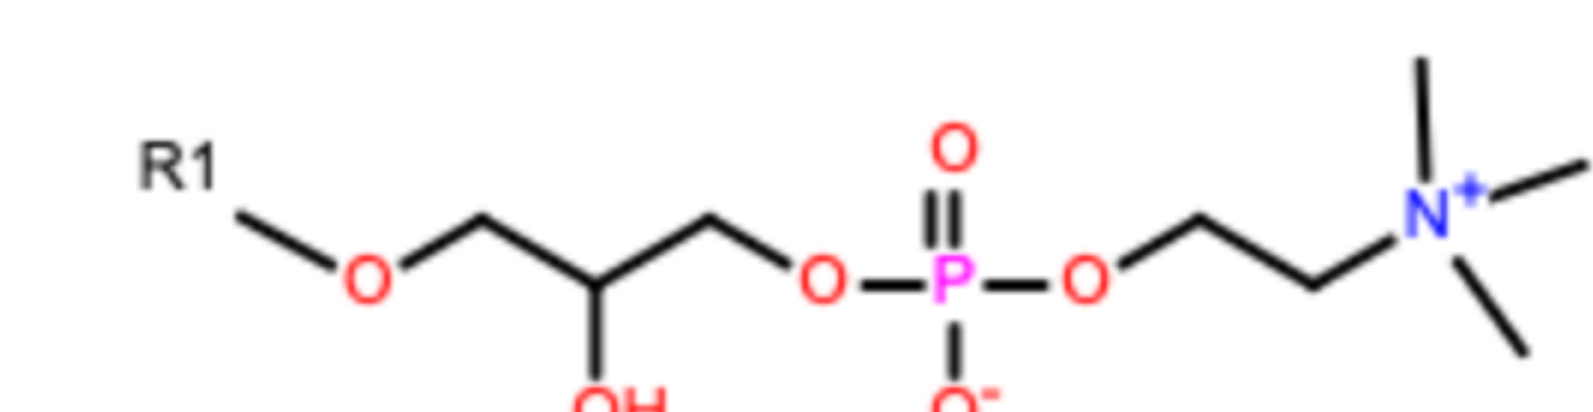

### Lyso- phosphatidylinositol (LPI)

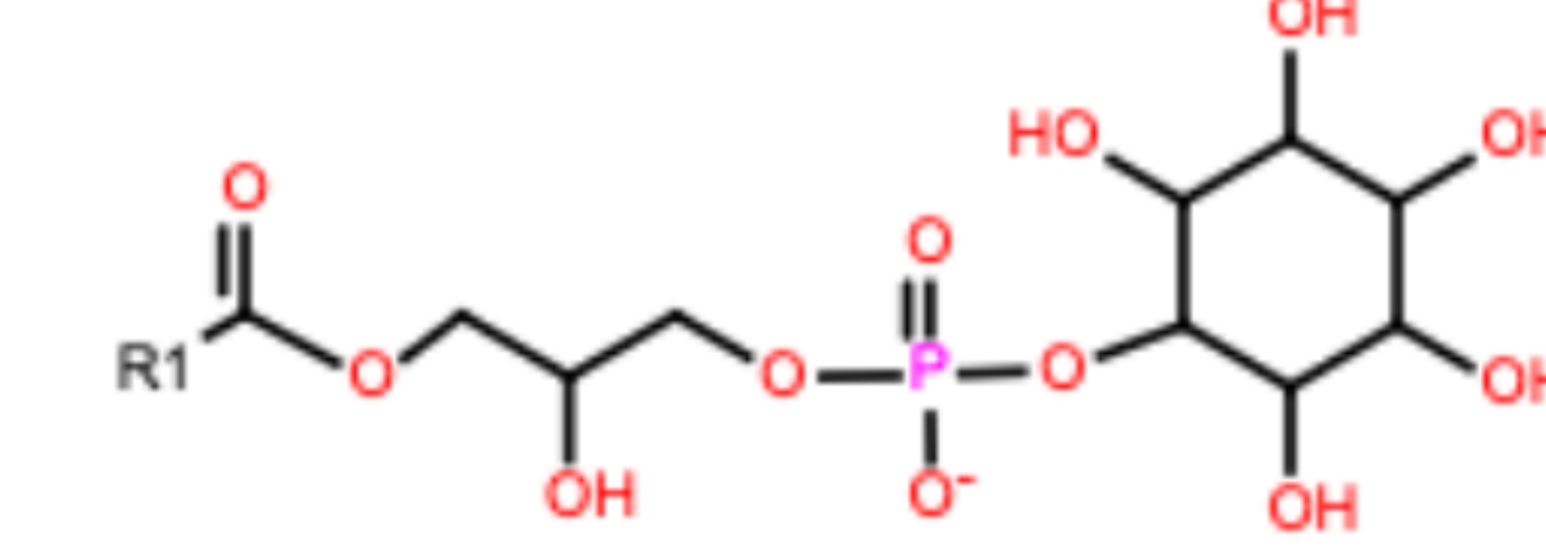

### Lyso- phosphatidic acid (LPA)

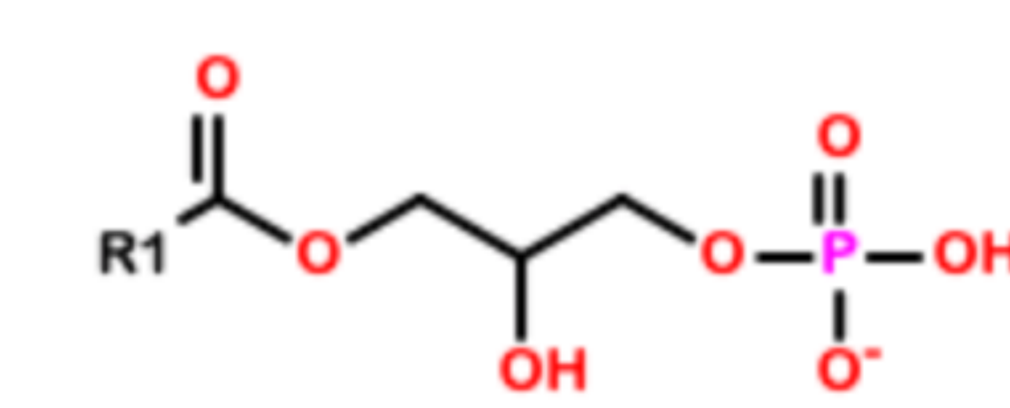

### Lyso- phosphatidylserine (LPS)

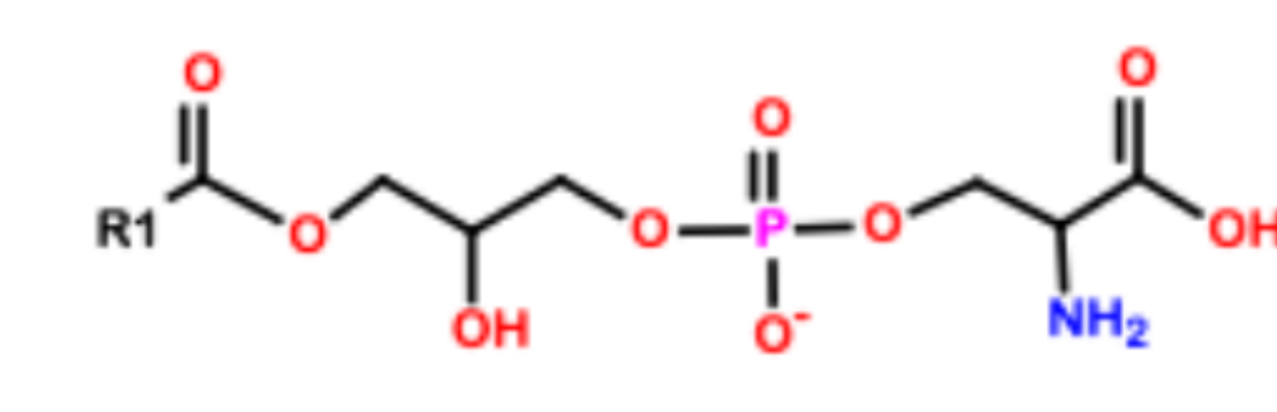

### Cholesterol (Chol)

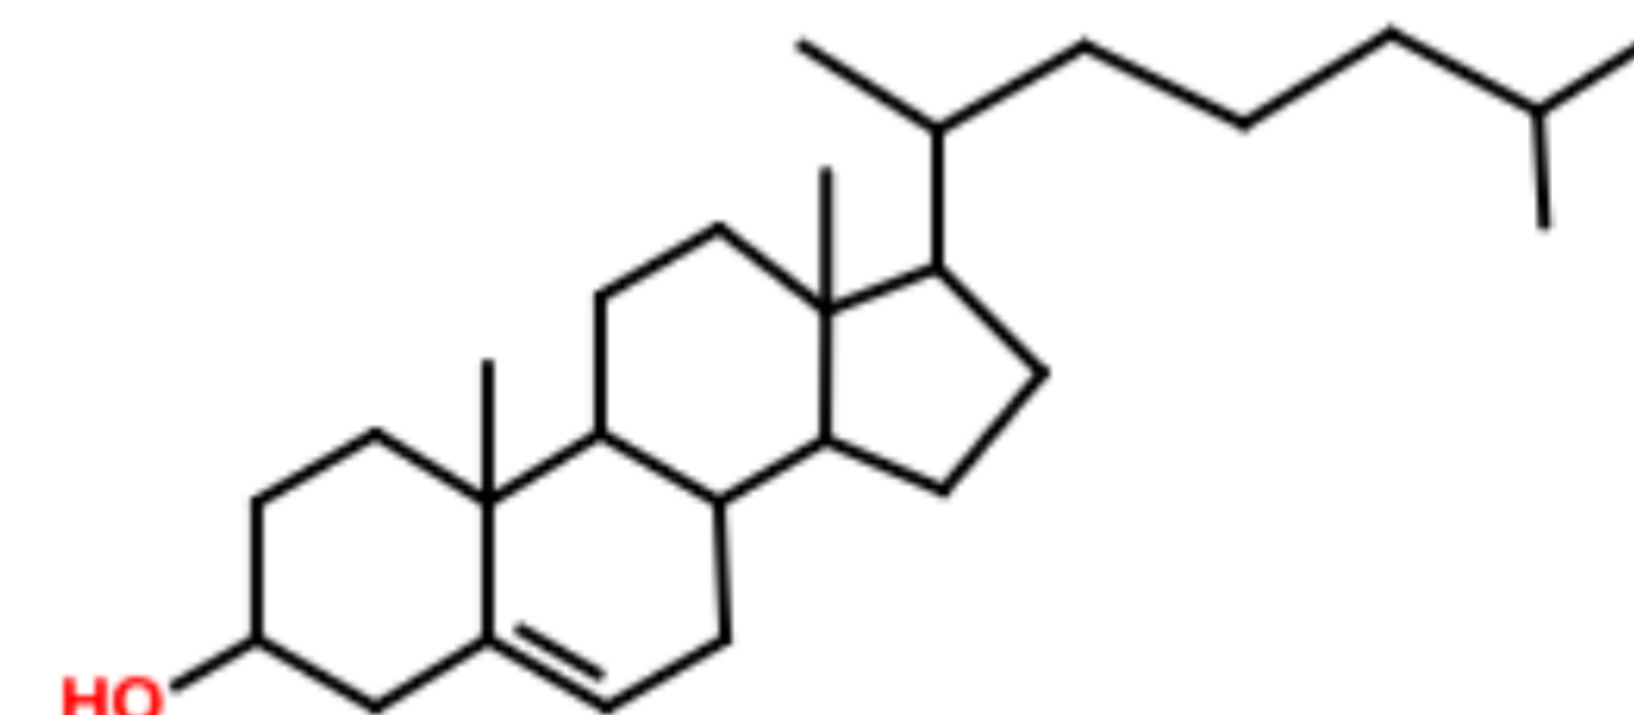

### Cholesterol esters (CE)

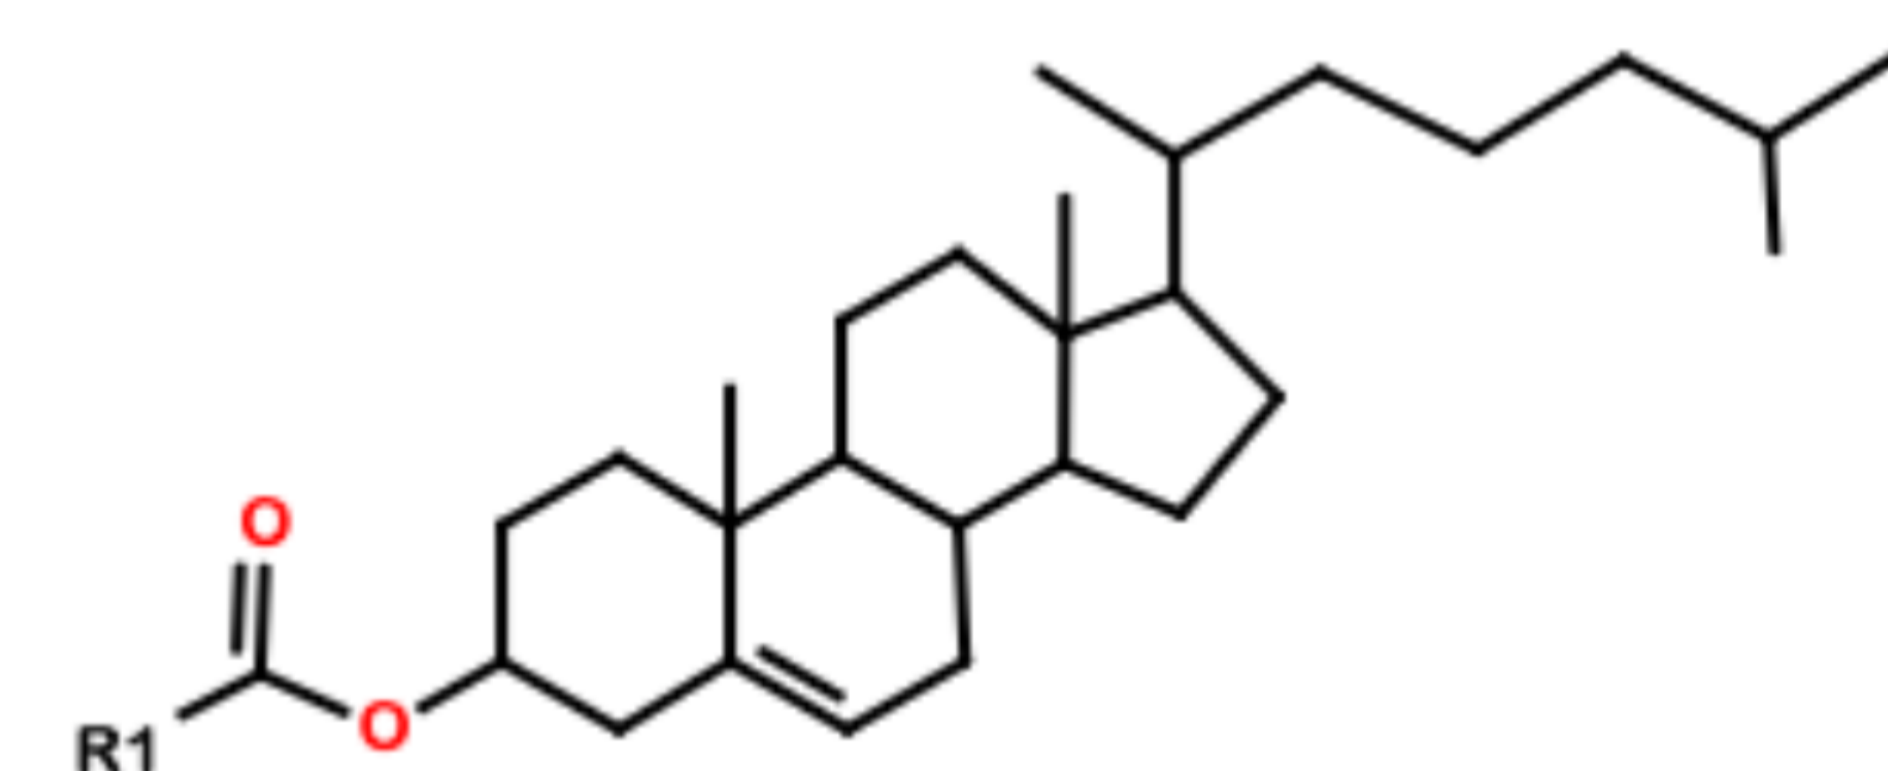

## Phospholipids
