# Supplementary material for: Mass Spectrometry–Based Lipidomics of Oral Squamous Cell Carcinoma Tissue Reveals Aberrant Cholesterol and Glycerophospholipid Metabolism — A Pilot Study
Source: PubMed Central journal article supplement — Transl Oncol. 2020 Jun 16;13(10):100807. doi: 10.1016/j.tranon.2020.100807 (PMC7303674; doi:10.1016/j.tranon.2020.100807), 2020-06-16

# Class level

# Species level

Before Normalization

After Normalization

Before Normalization

After Normalization

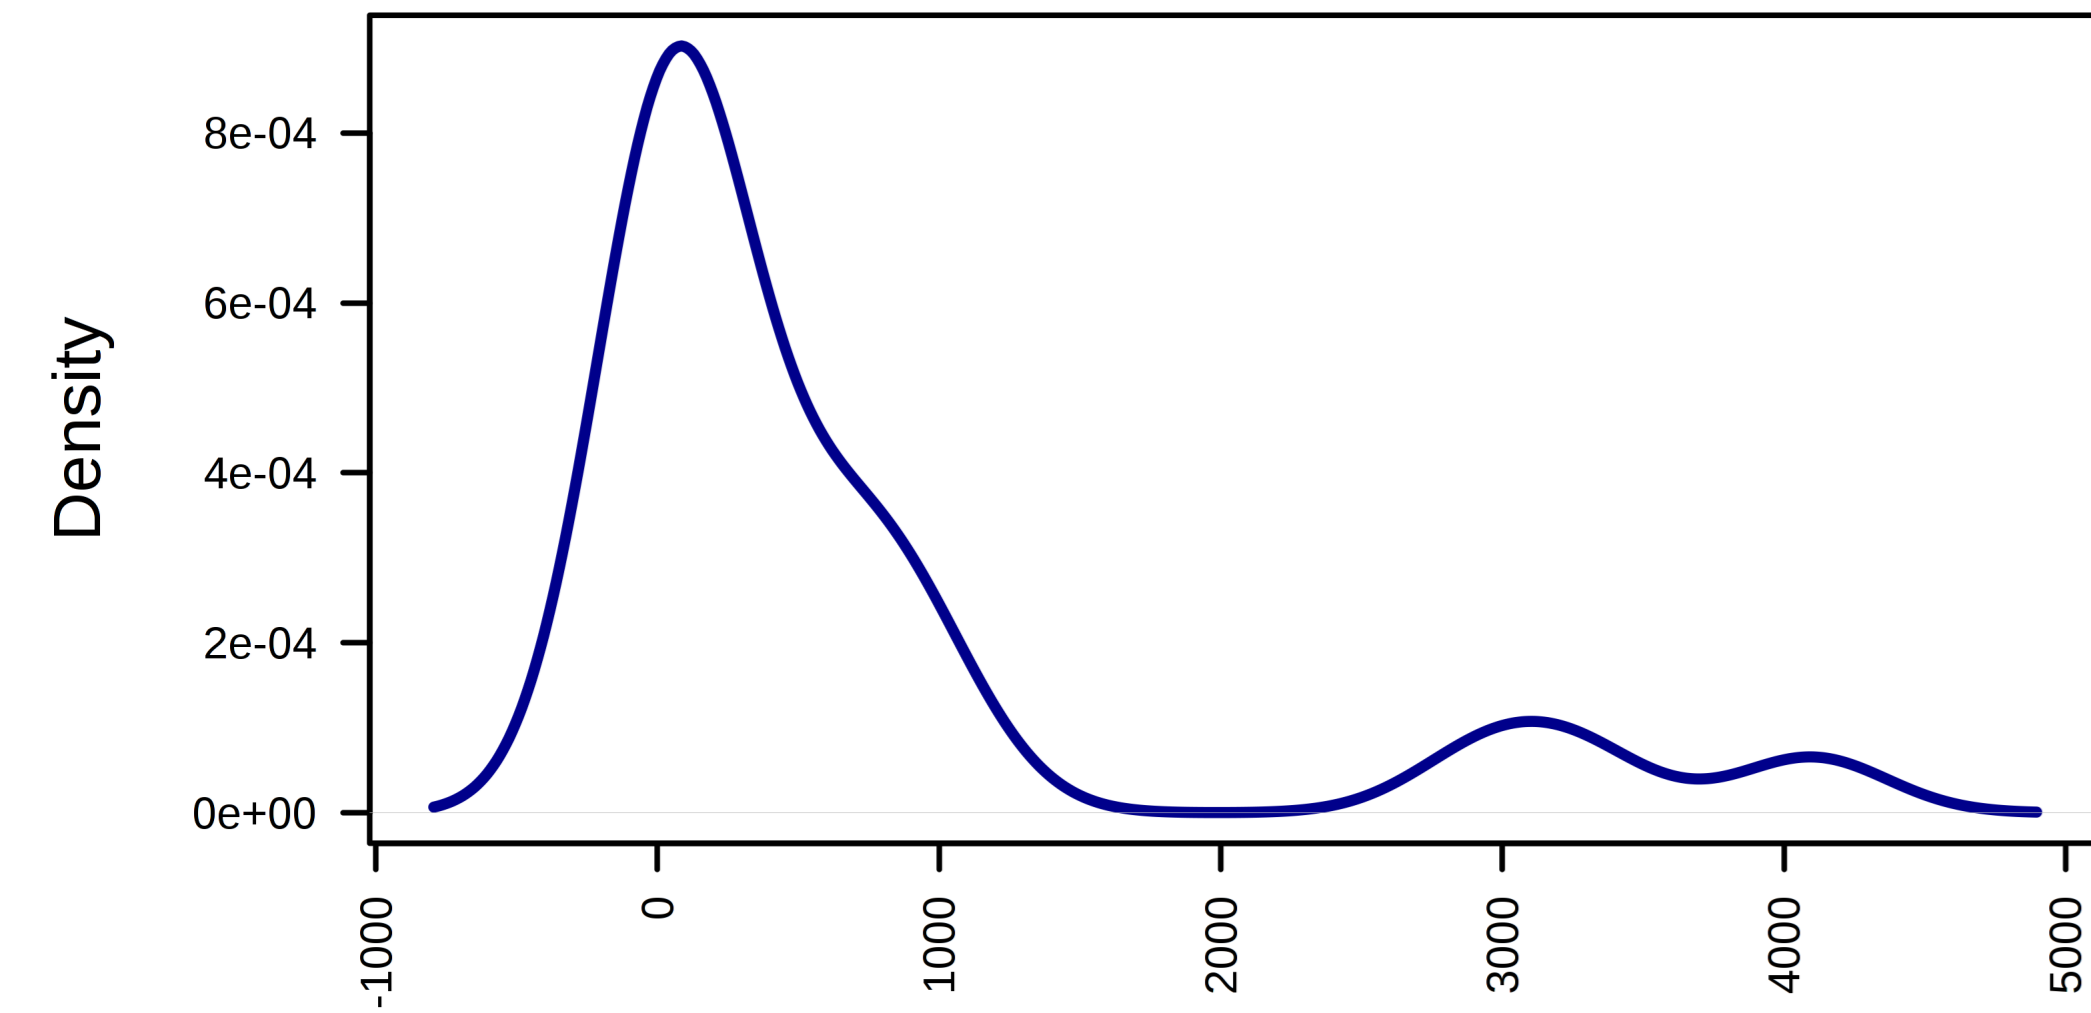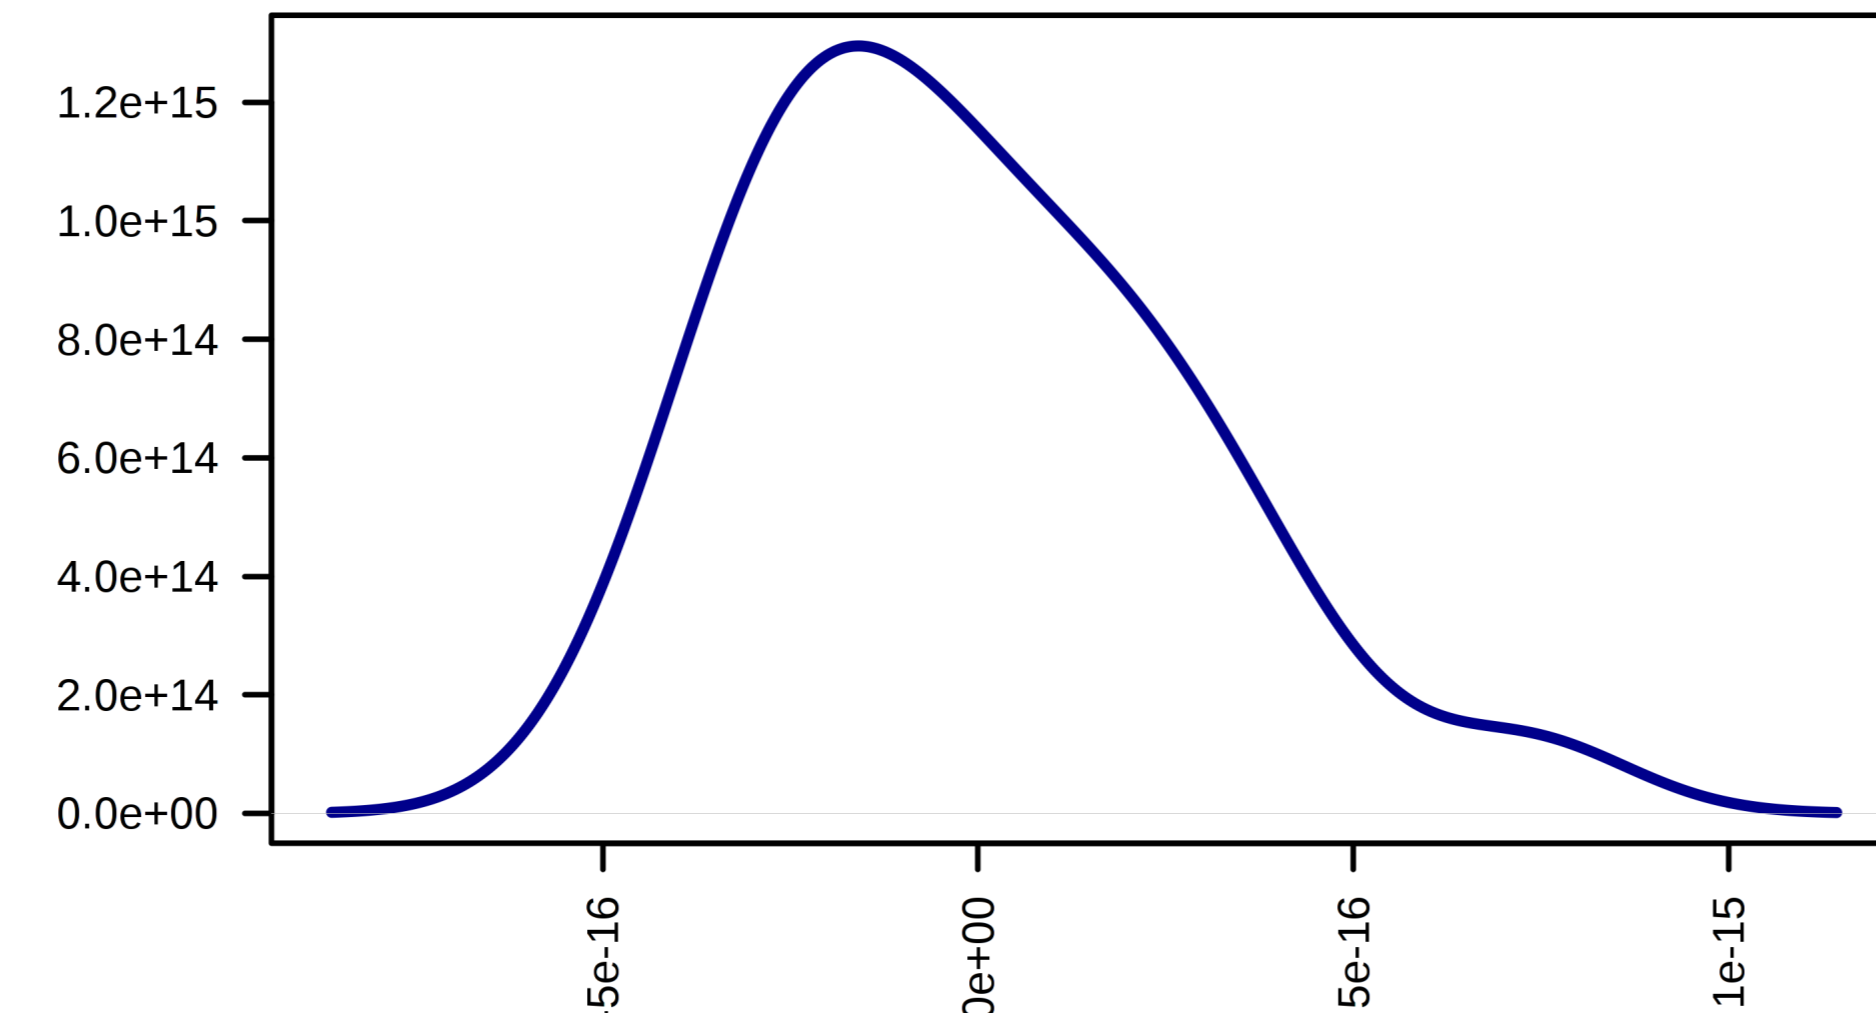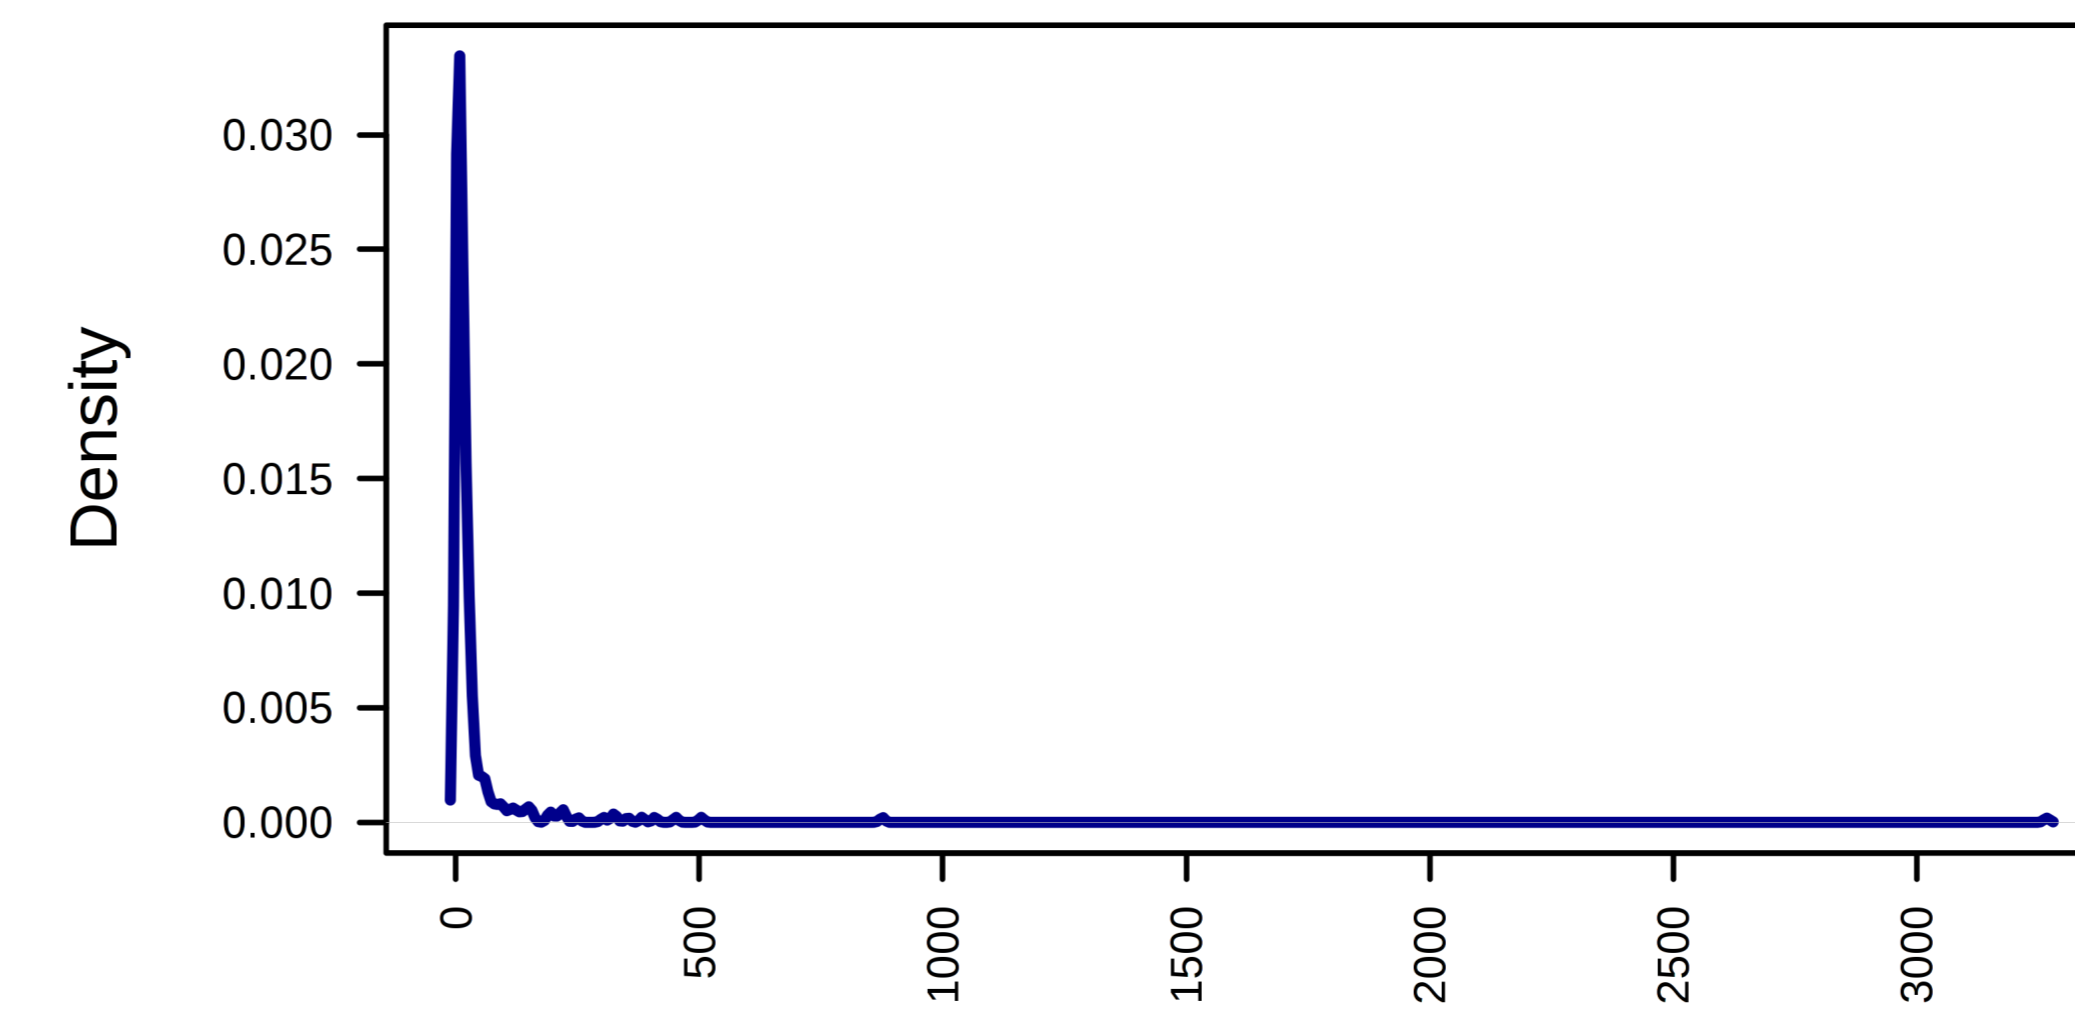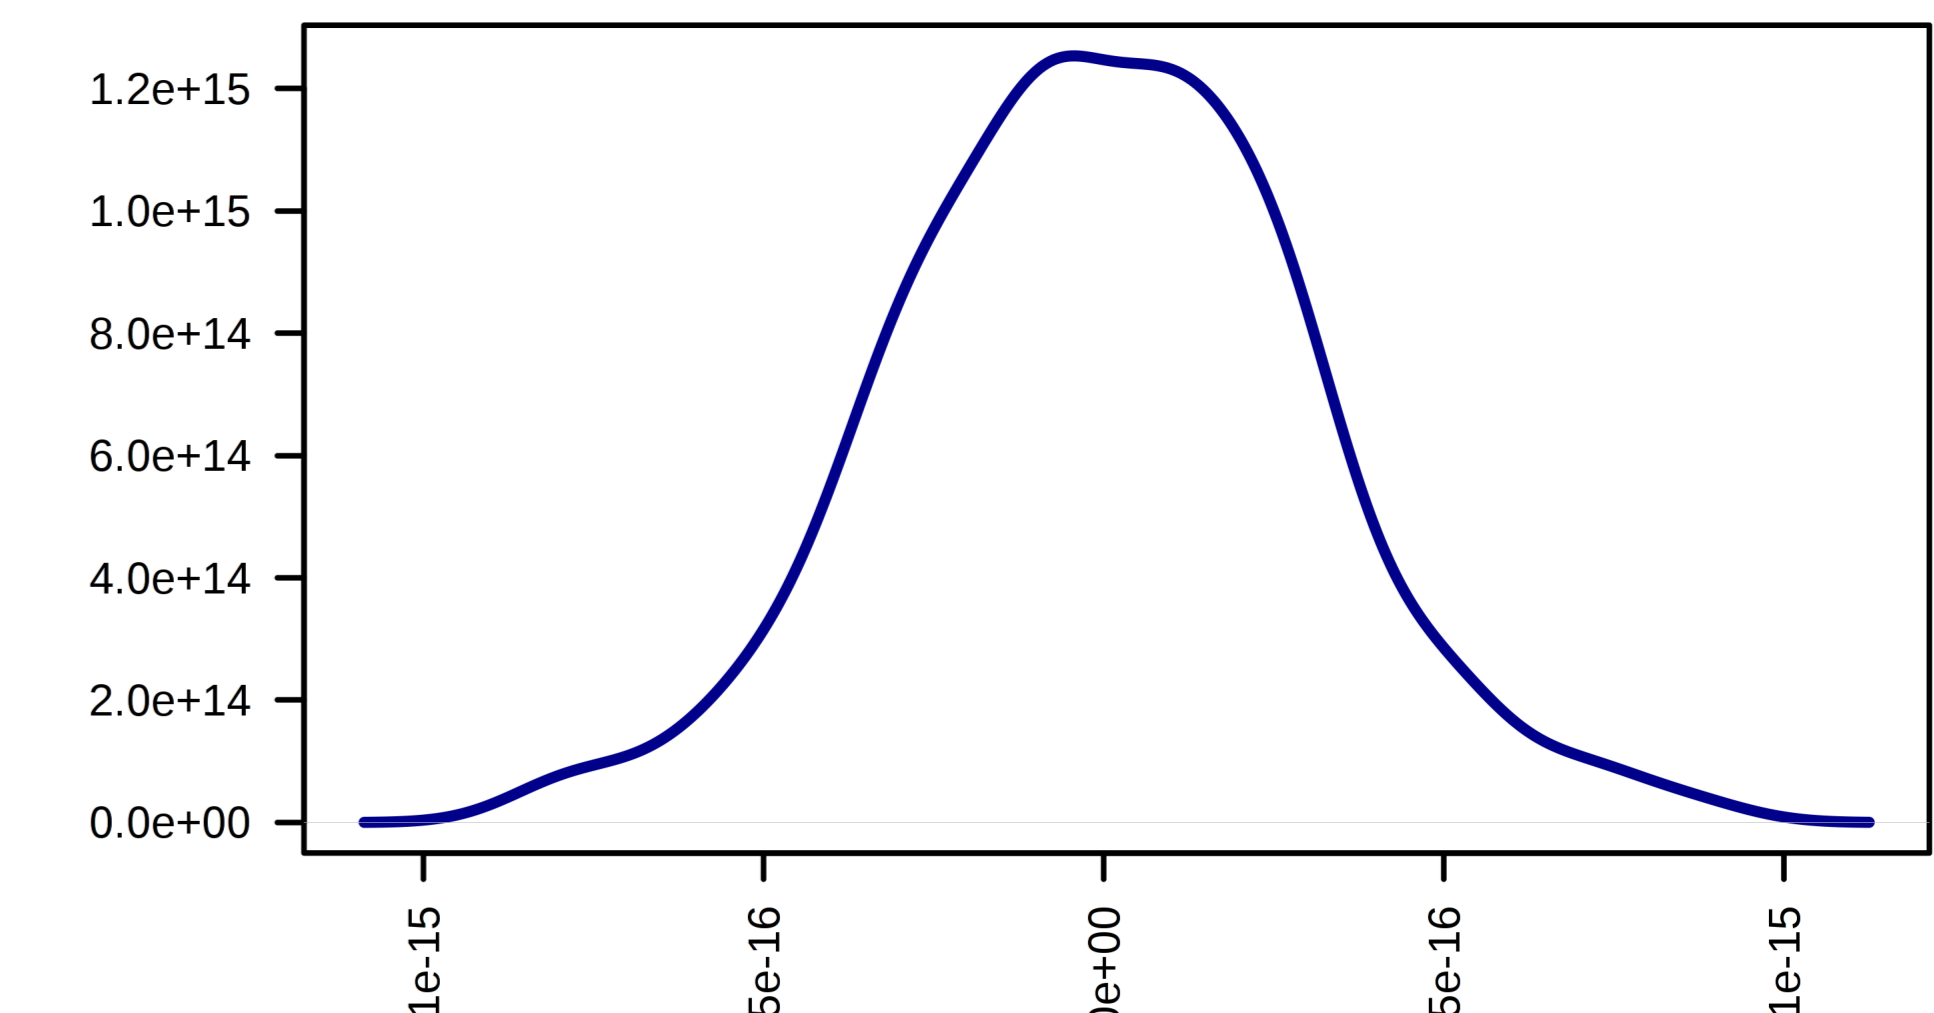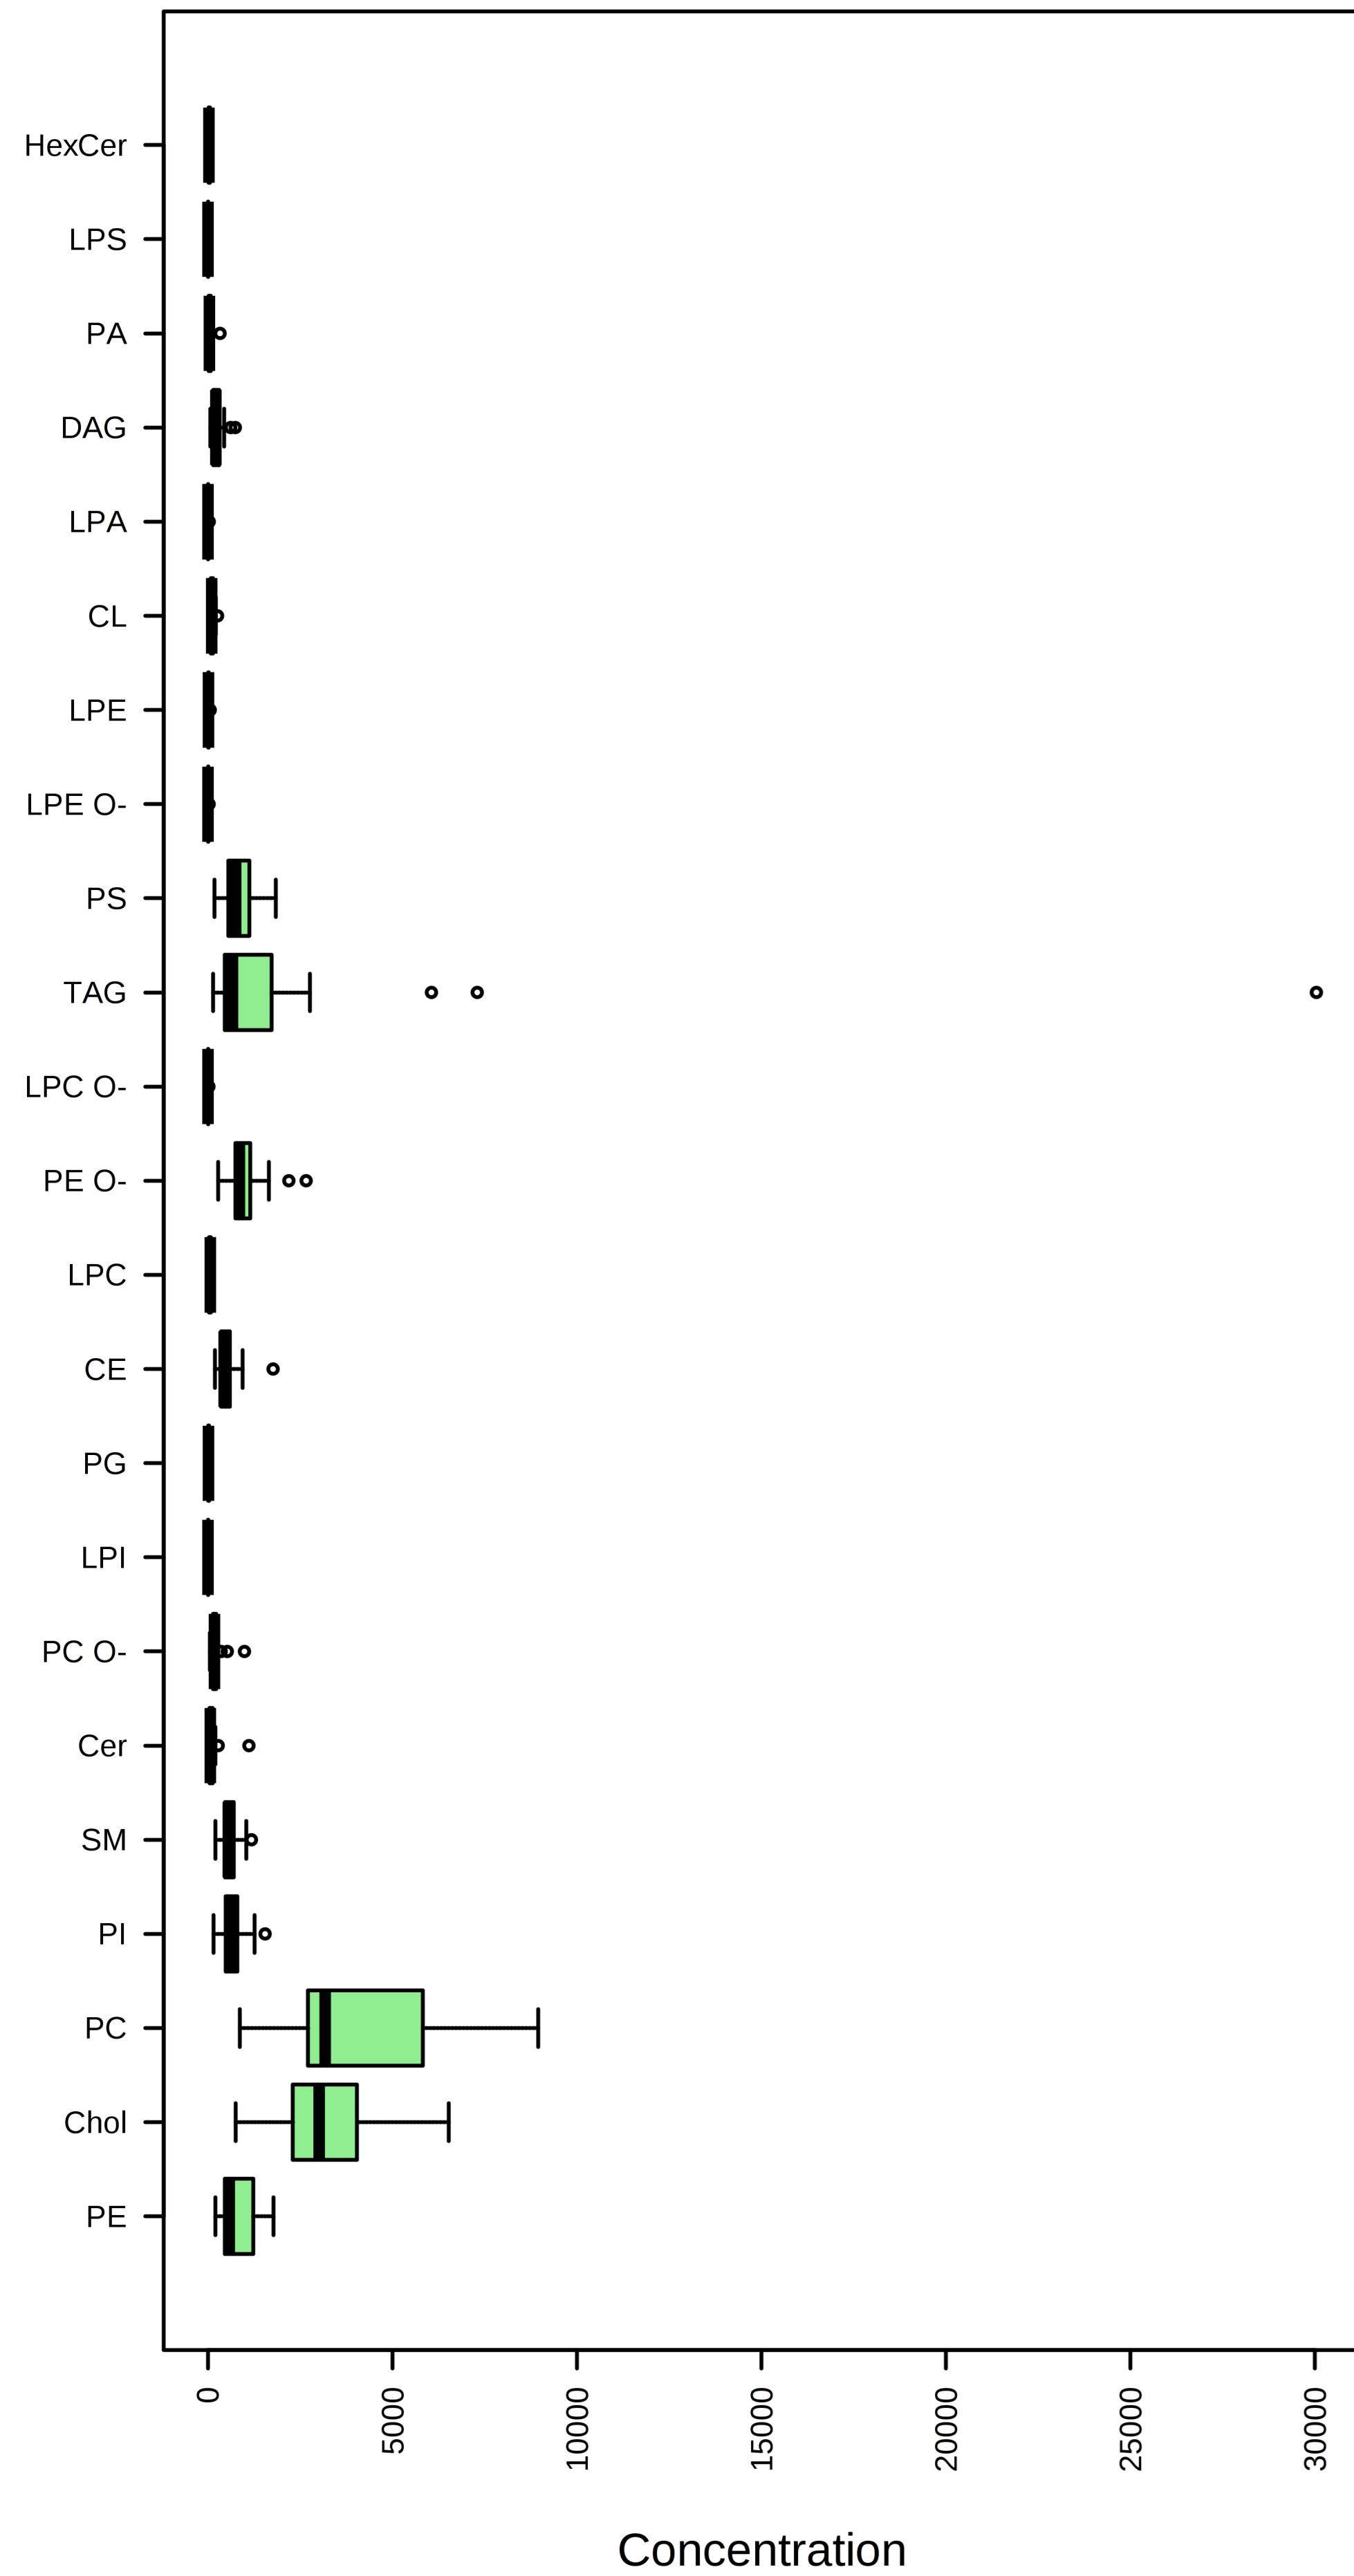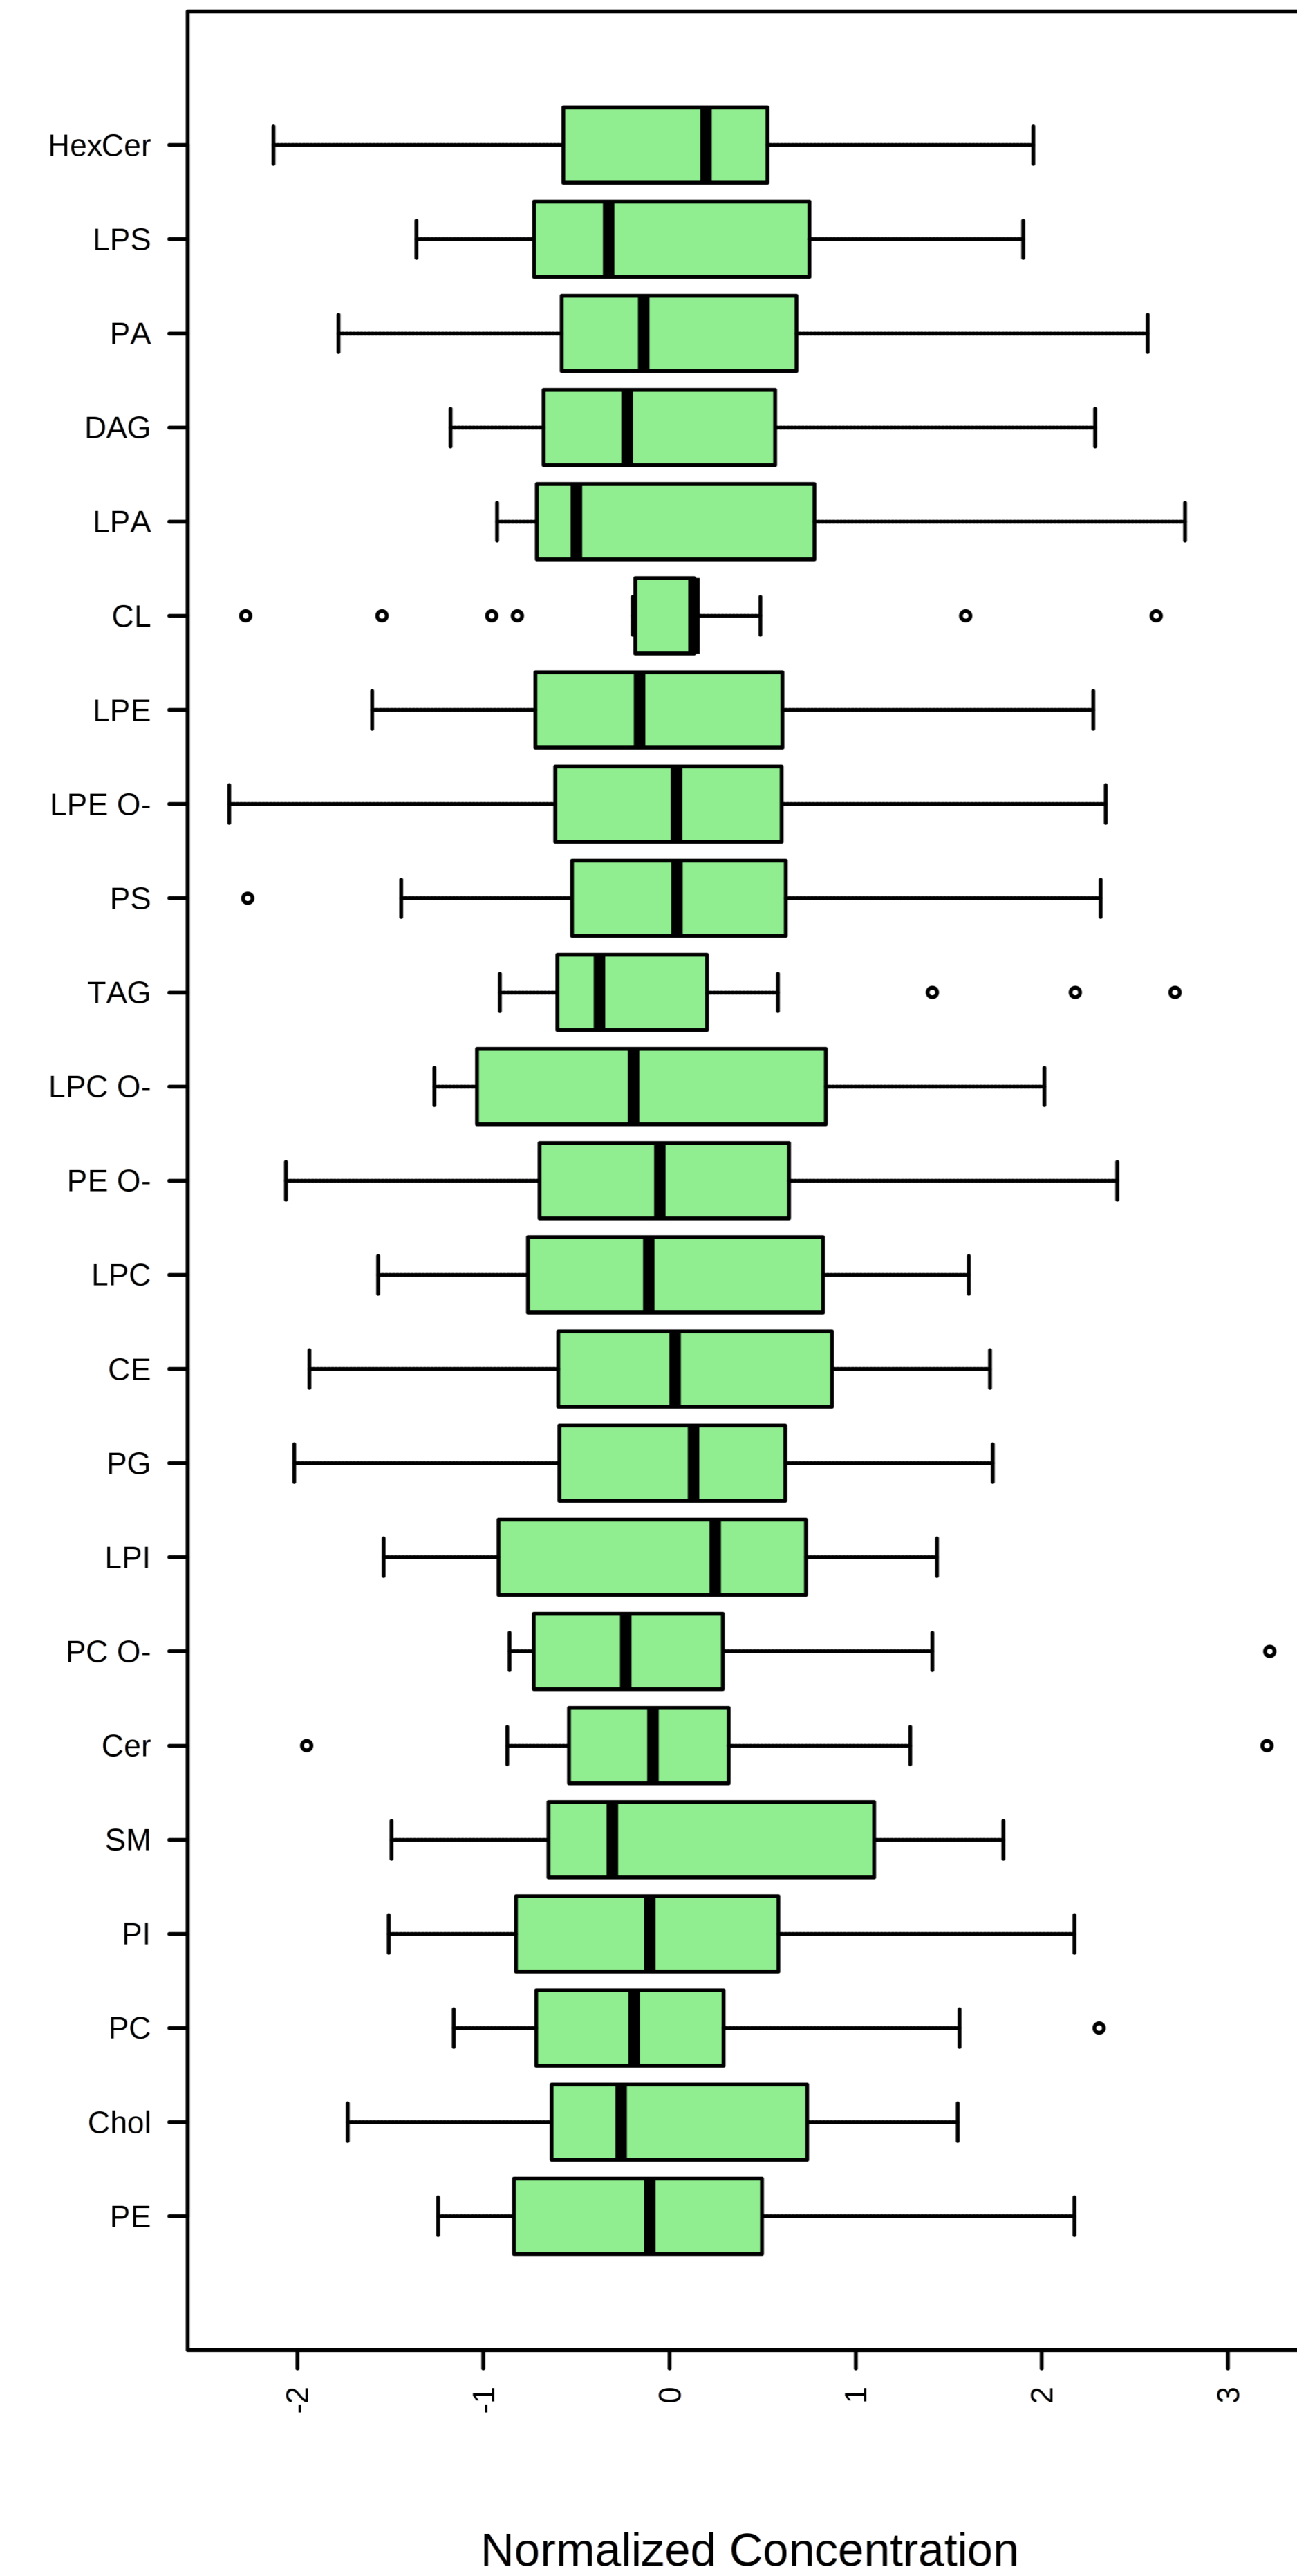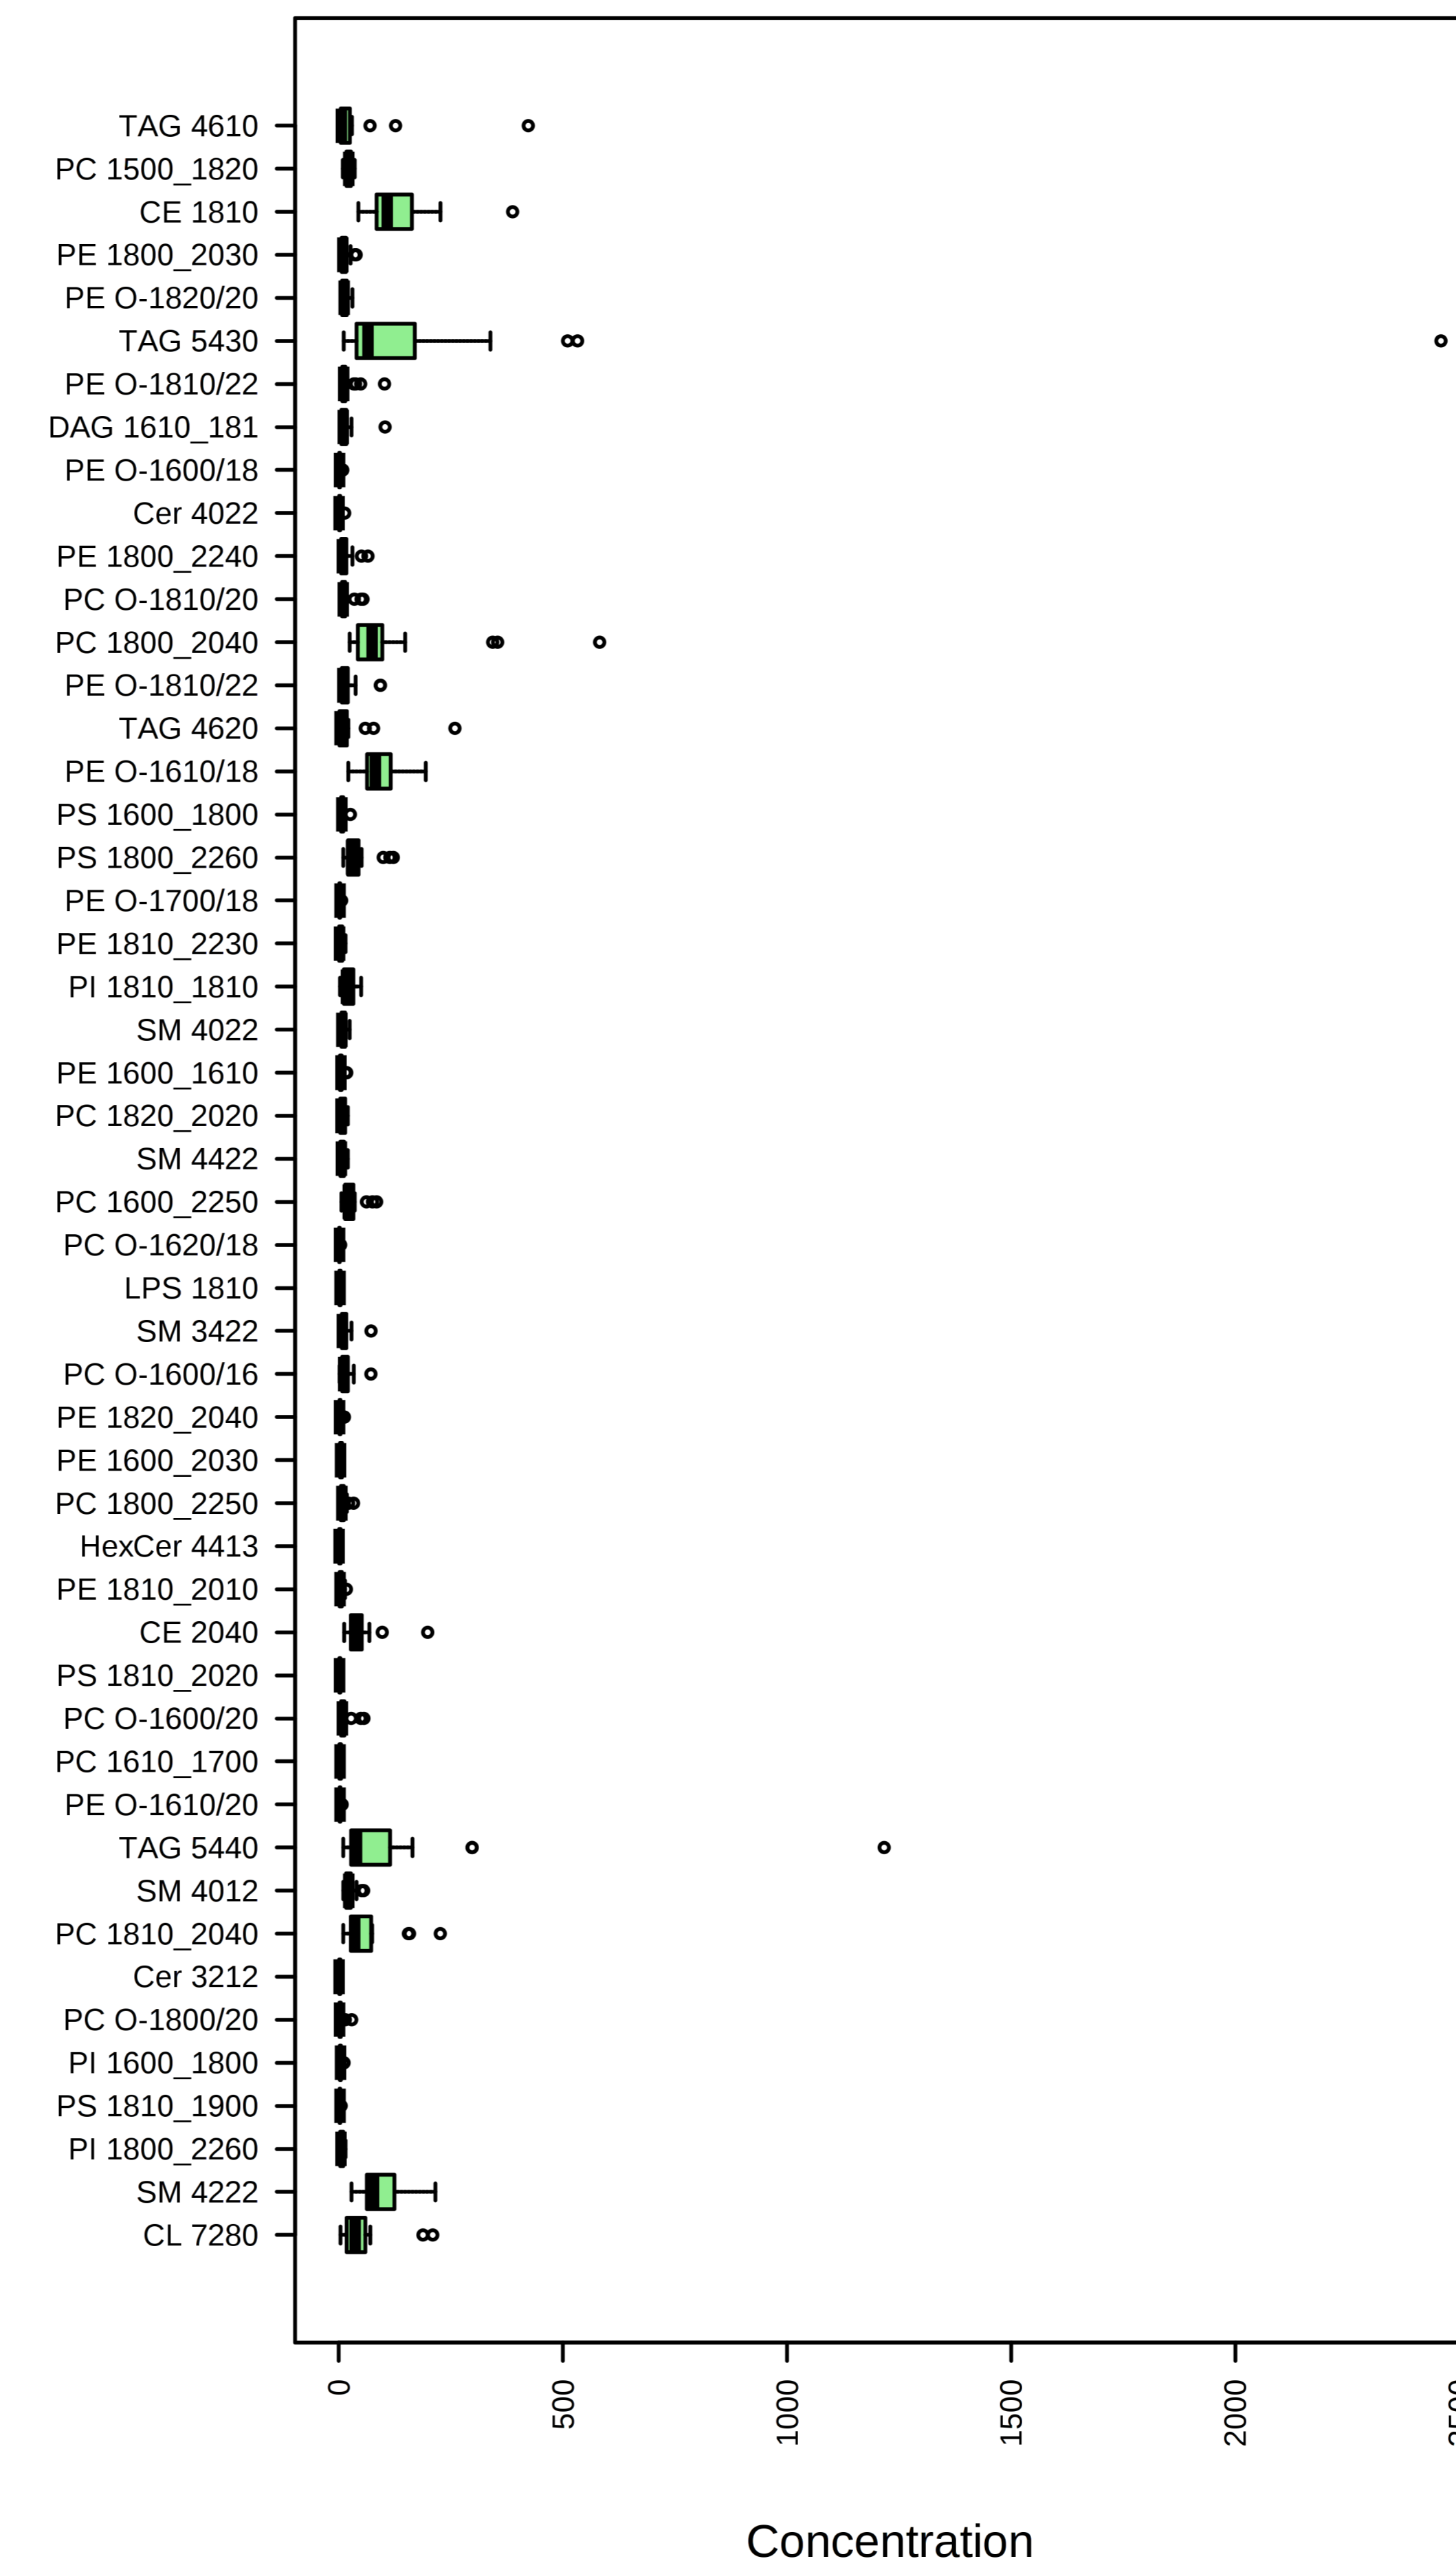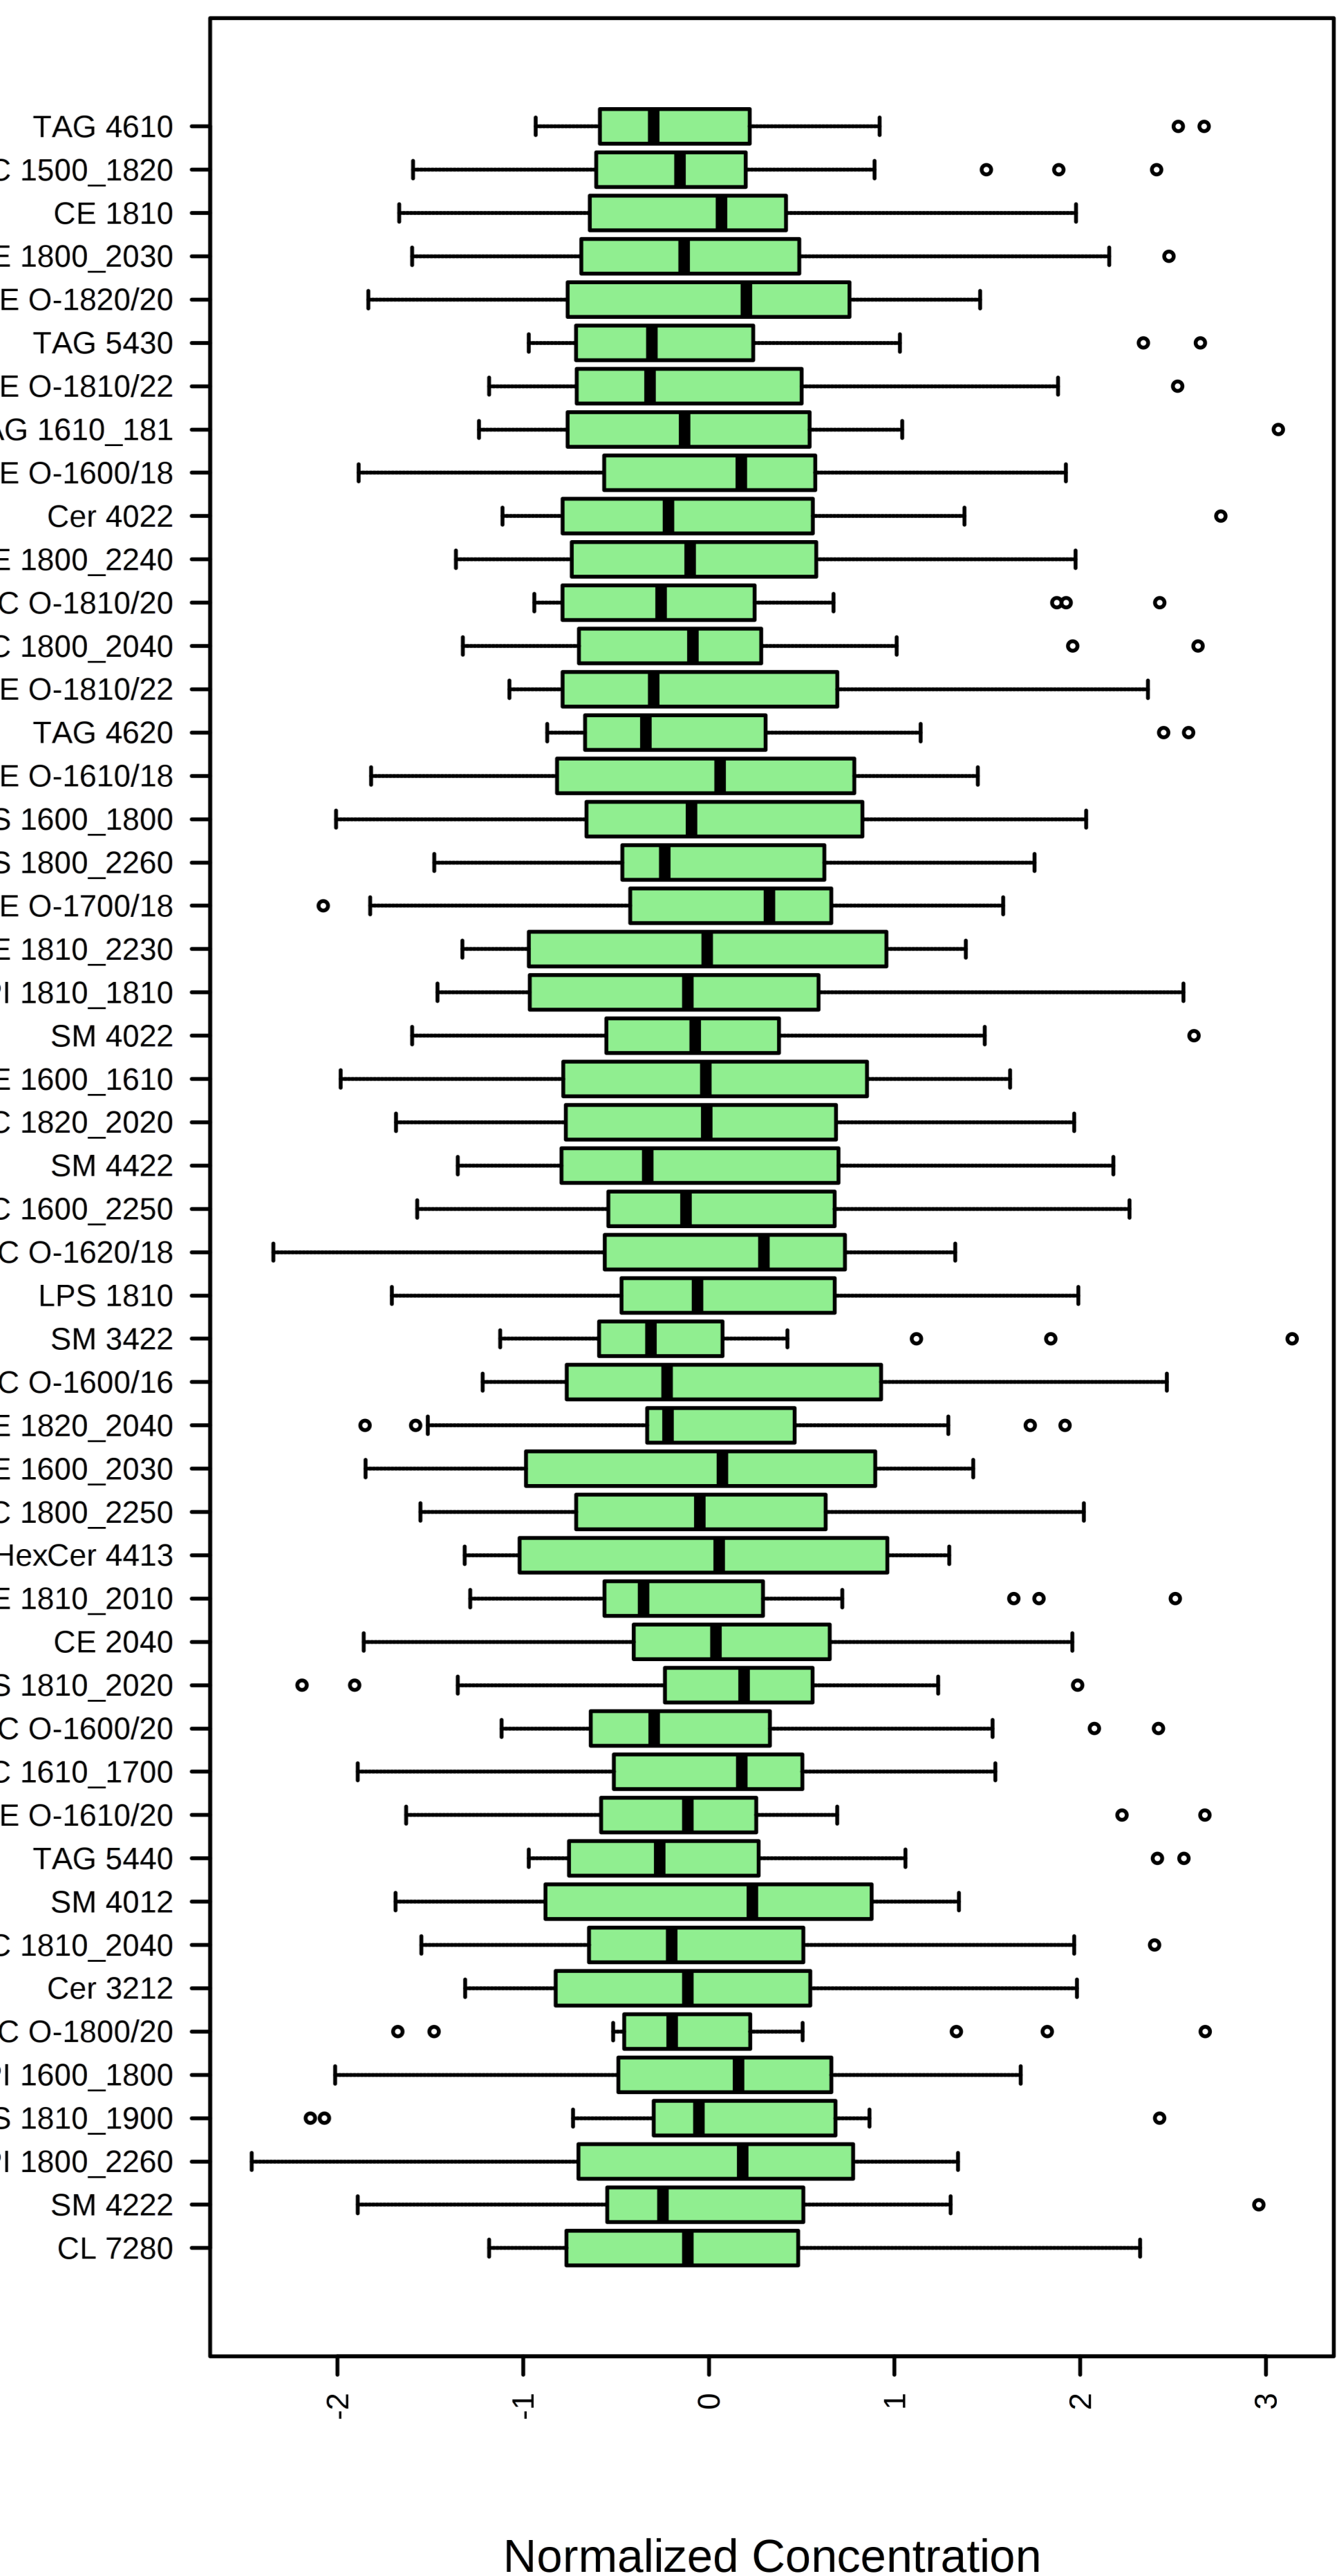

Supplement: mmc8.pdf [file mmc8.pdf]
