# Supplementary material for: Mass Spectrometry–Based Lipidomics of Oral Squamous Cell Carcinoma Tissue Reveals Aberrant Cholesterol and Glycerophospholipid Metabolism — A Pilot Study
Source: PubMed Central journal article supplement — Transl Oncol. 2020 Jun 16;13(10):100807. doi: 10.1016/j.tranon.2020.100807 (PMC7303674; doi:10.1016/j.tranon.2020.100807), 2020-06-16
Supplement: mmc14.pdf [file mmc14.pdf]

# Supplementary Figure 4a

## GLYCEROPHOSPHOLIPID METABOLISM

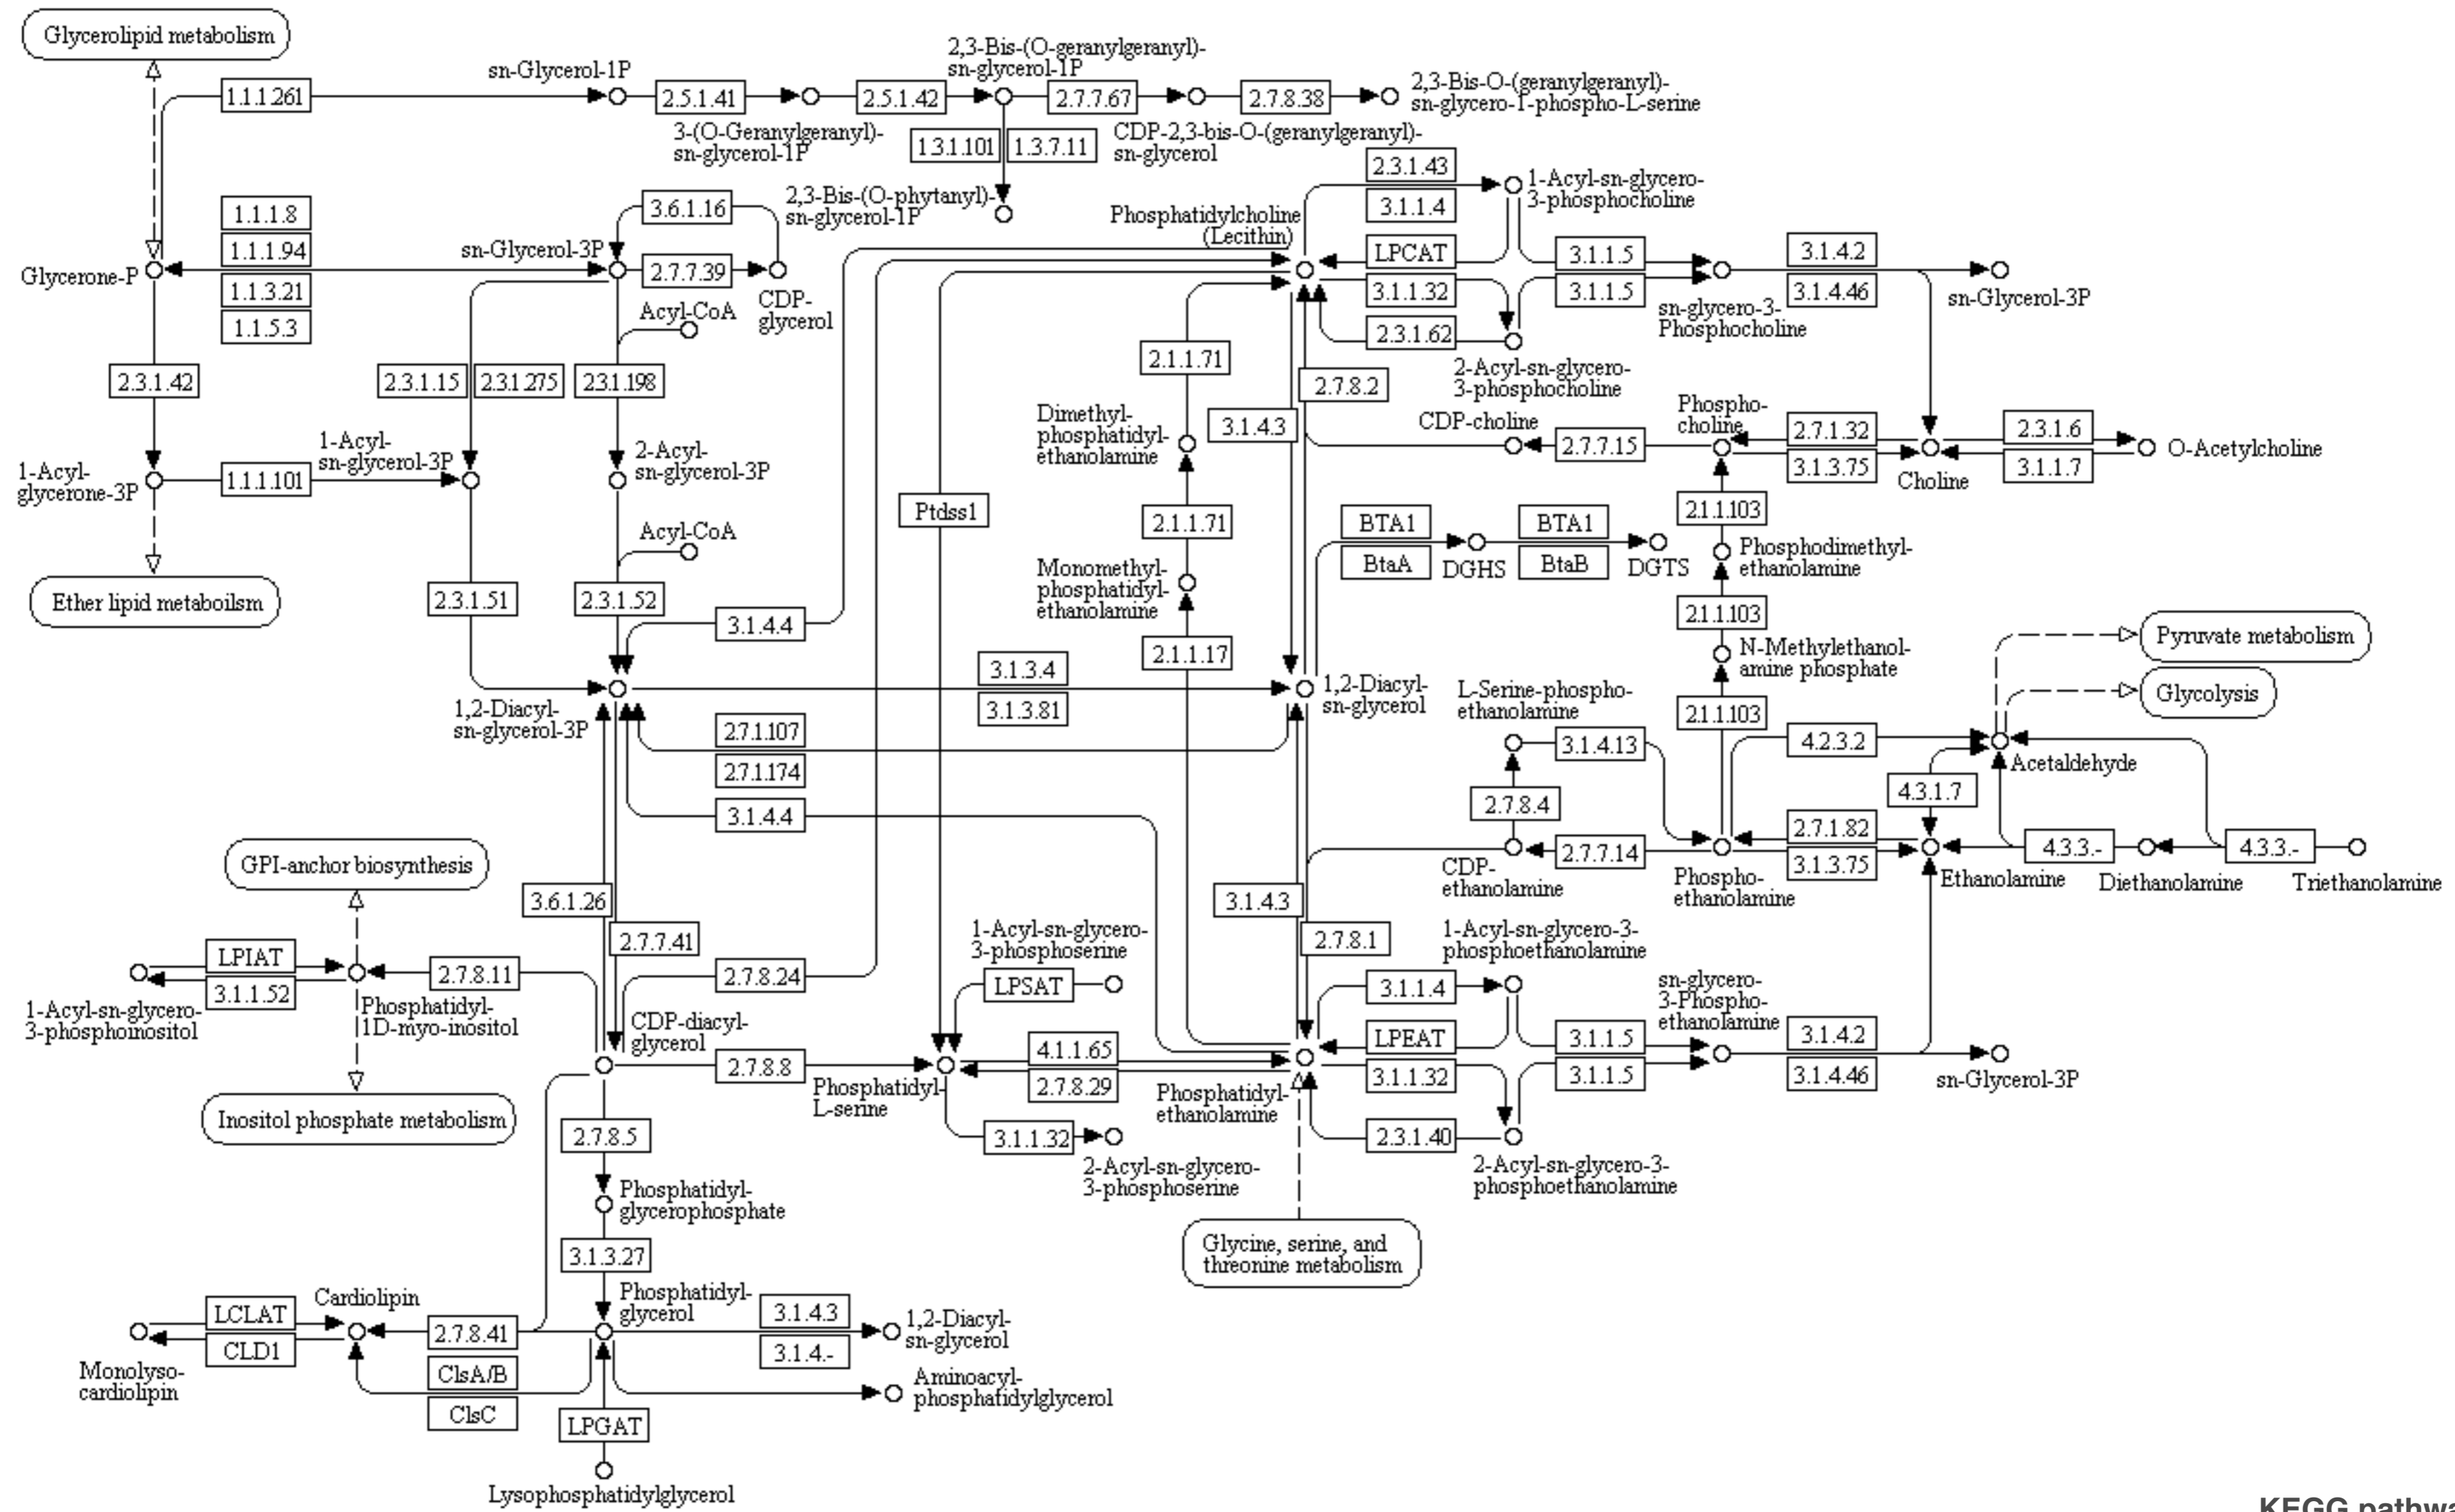

# Supplementary Figure 4b

## SPHINGOLIPID SIGNALING PATHWAY

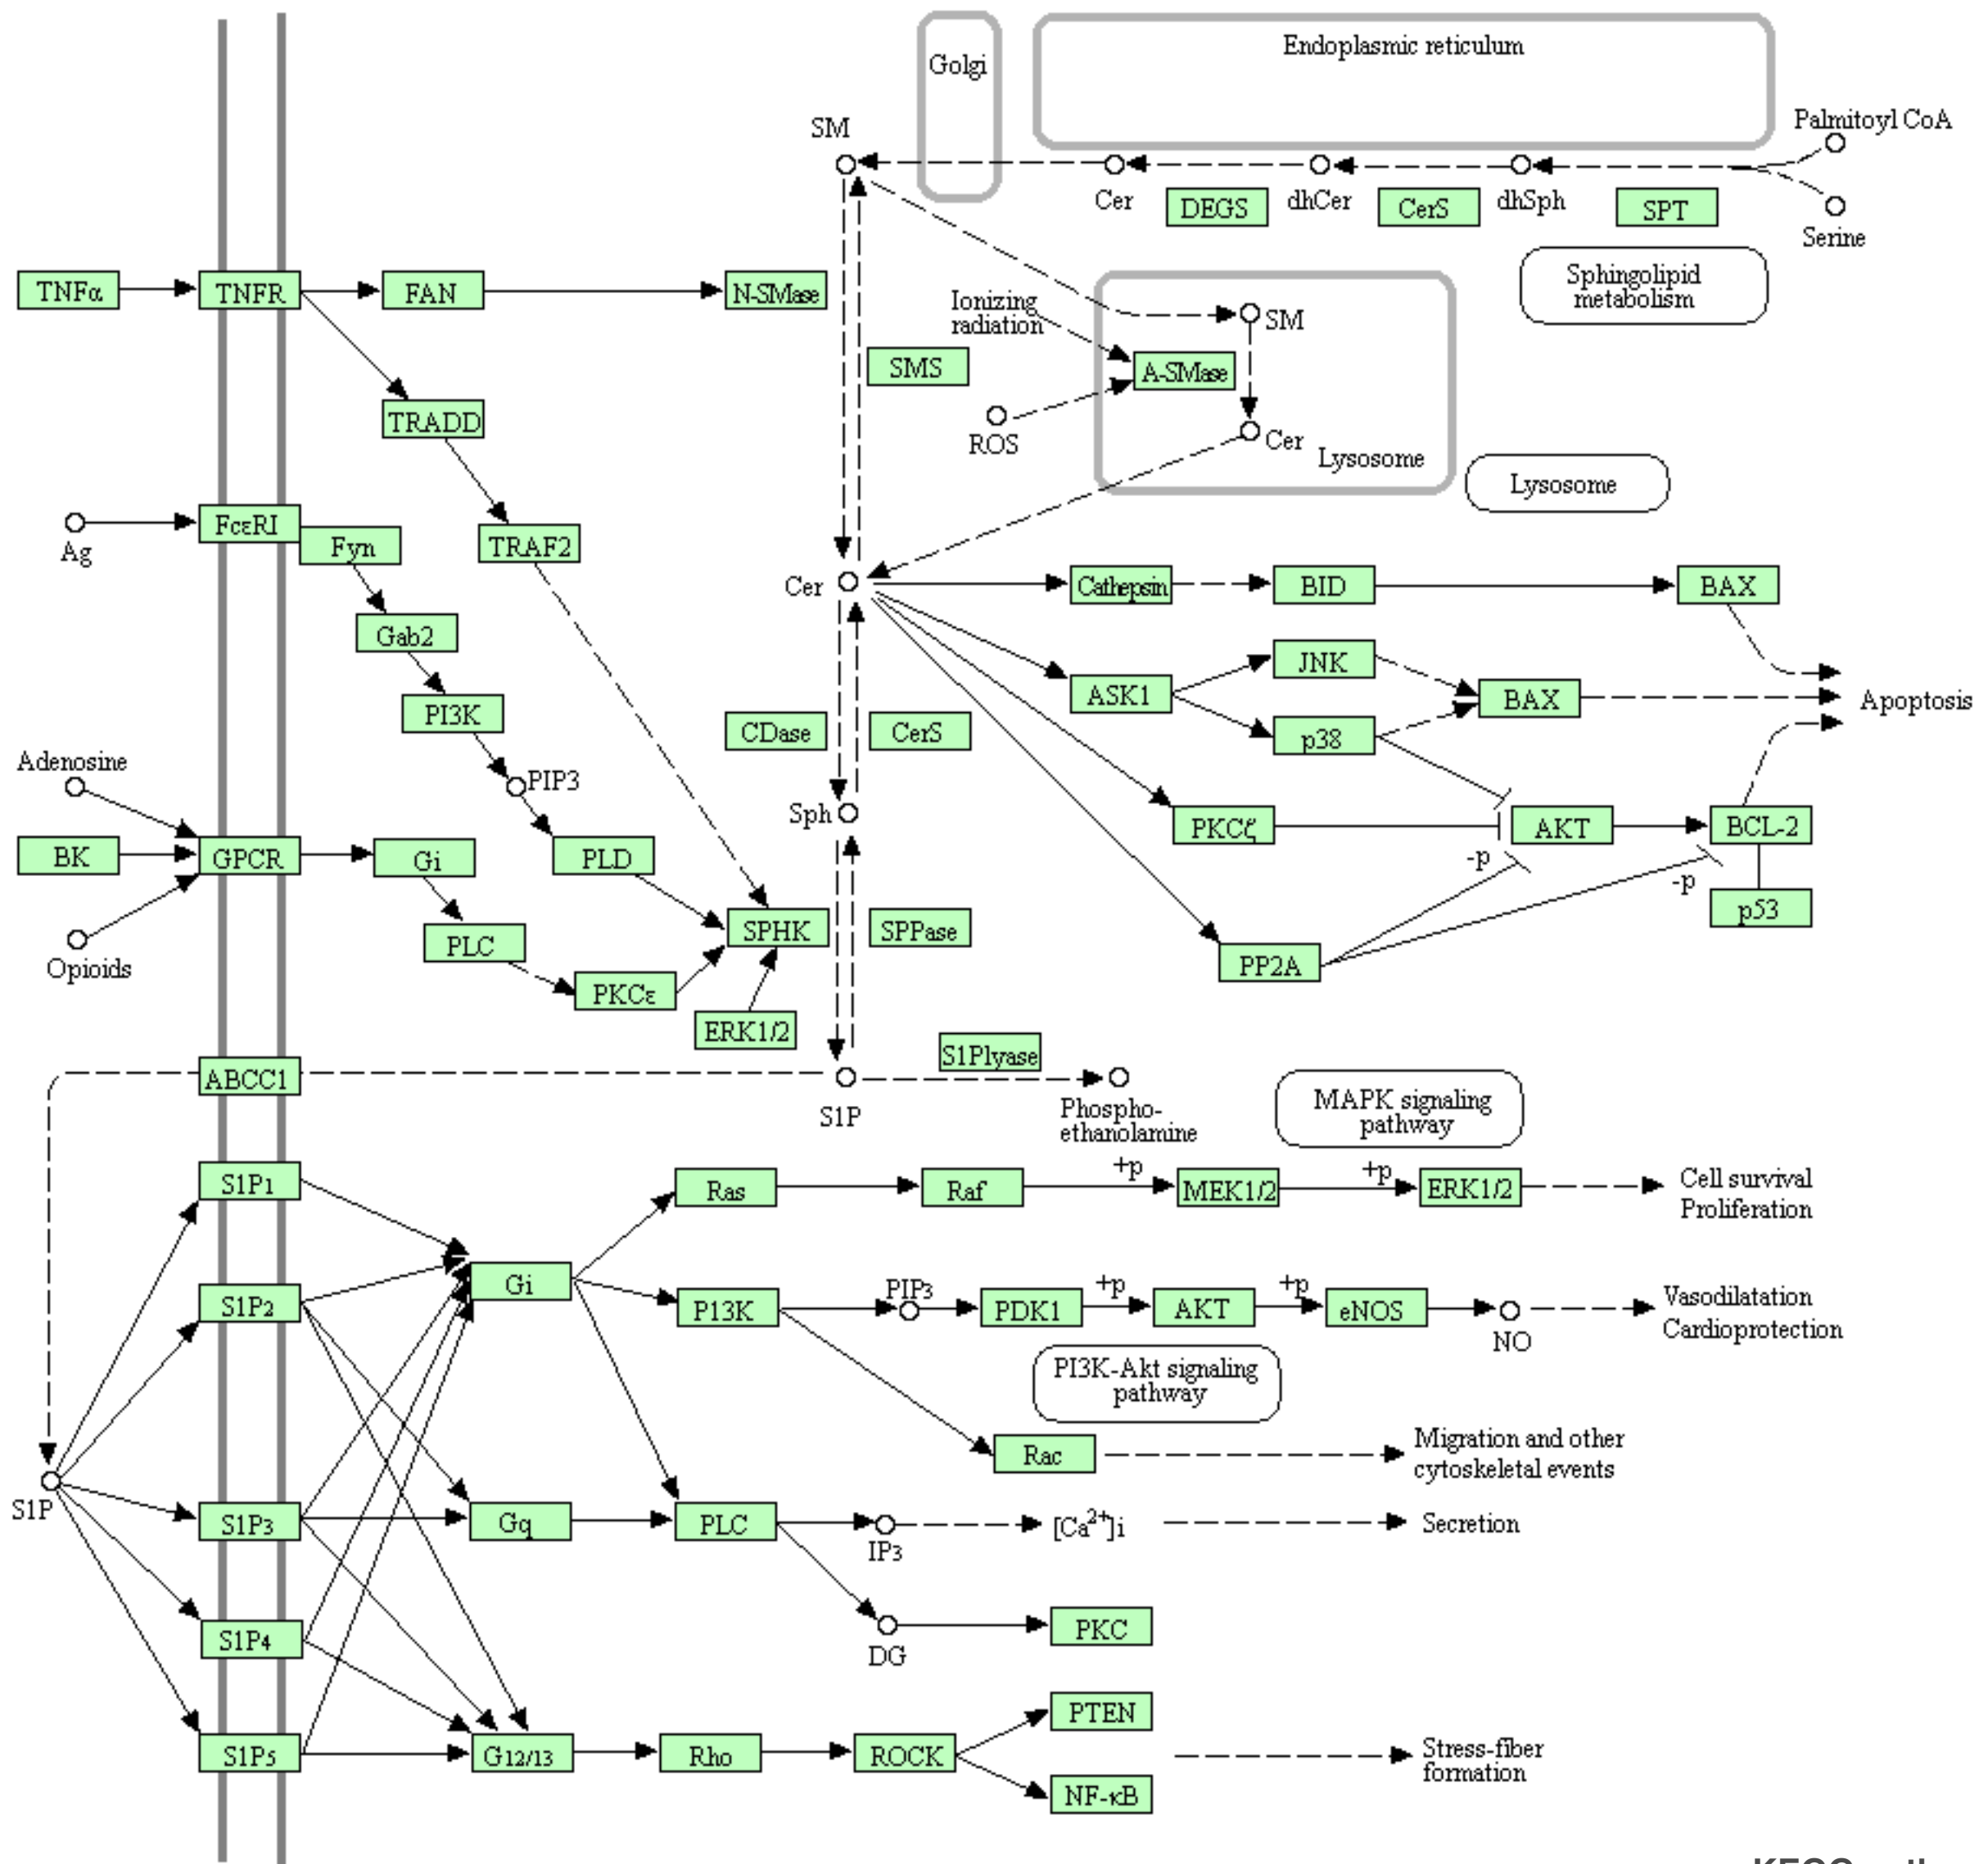

# Supplementary Figure 4c

RETROGRADE ENDOCANNABINOID SIGNALING

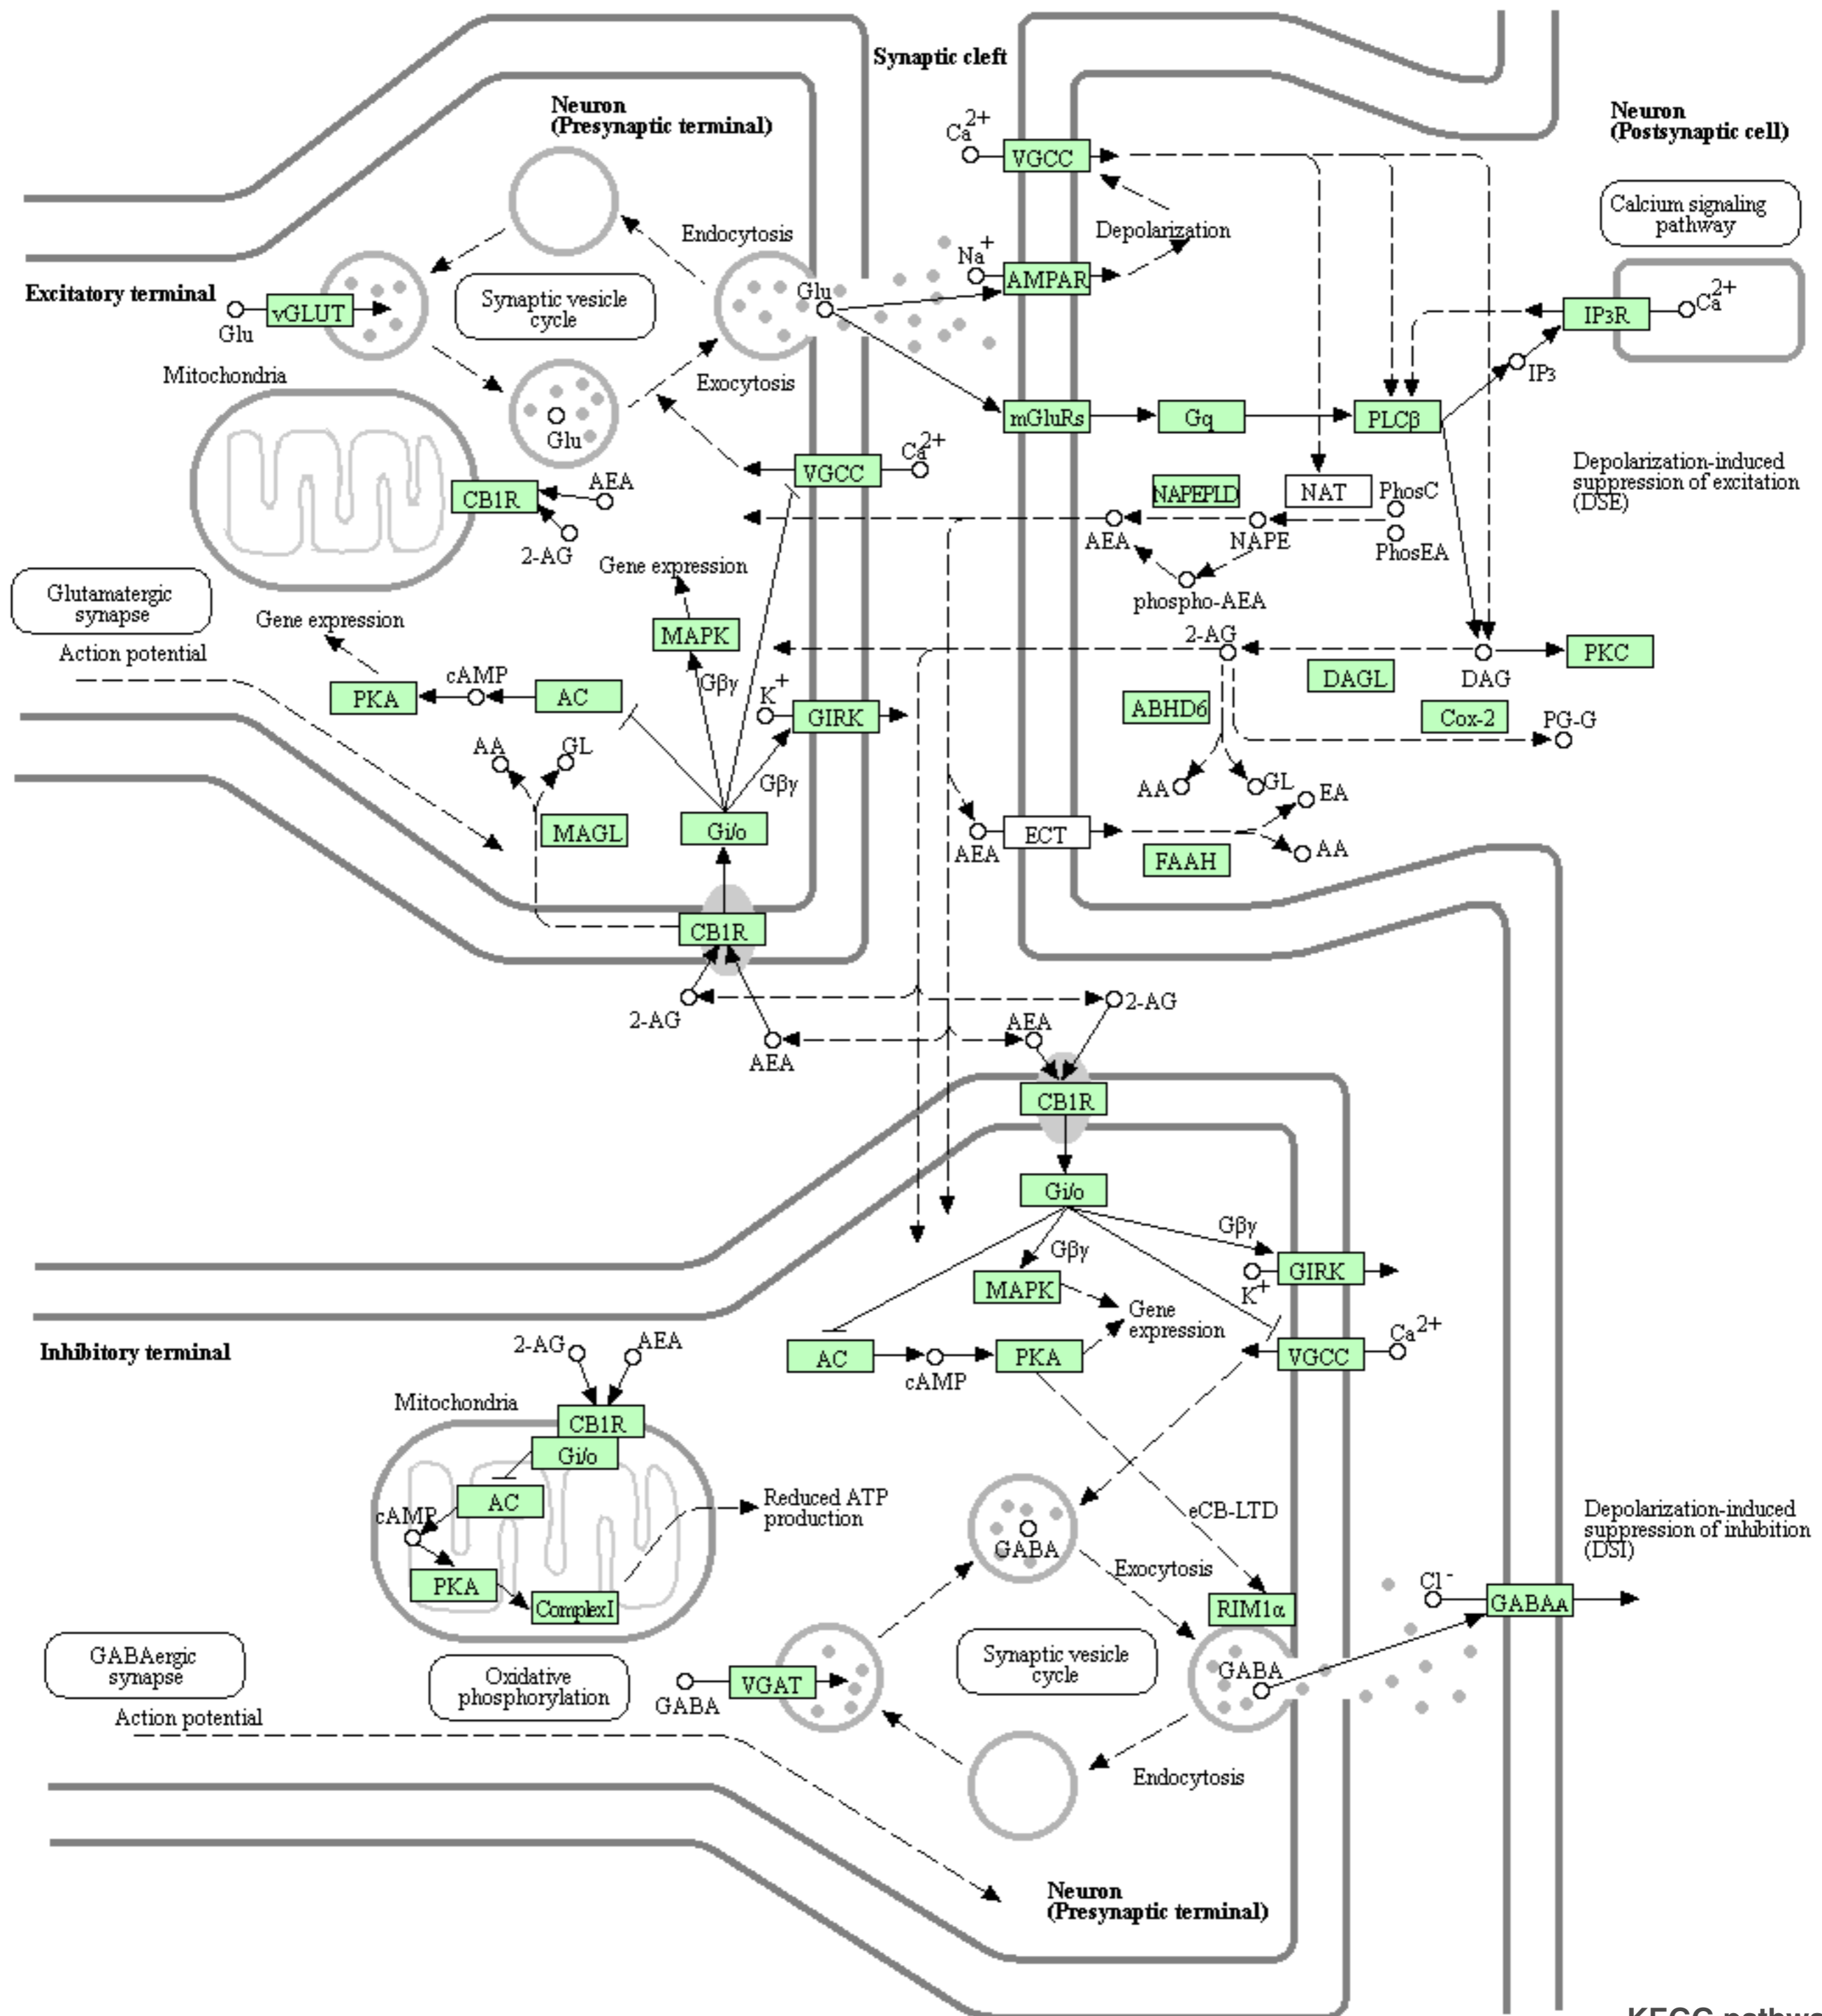

KEGG pathway
