# Supplementary material for: Mass Spectrometry–Based Lipidomics of Oral Squamous Cell Carcinoma Tissue Reveals Aberrant Cholesterol and Glycerophospholipid Metabolism — A Pilot Study
Source: PubMed Central journal article supplement — Transl Oncol. 2020 Jun 16;13(10):100807. doi: 10.1016/j.tranon.2020.100807 (PMC7303674; doi:10.1016/j.tranon.2020.100807), 2020-06-16

# Phosphatidic acid (PA) fatty acids

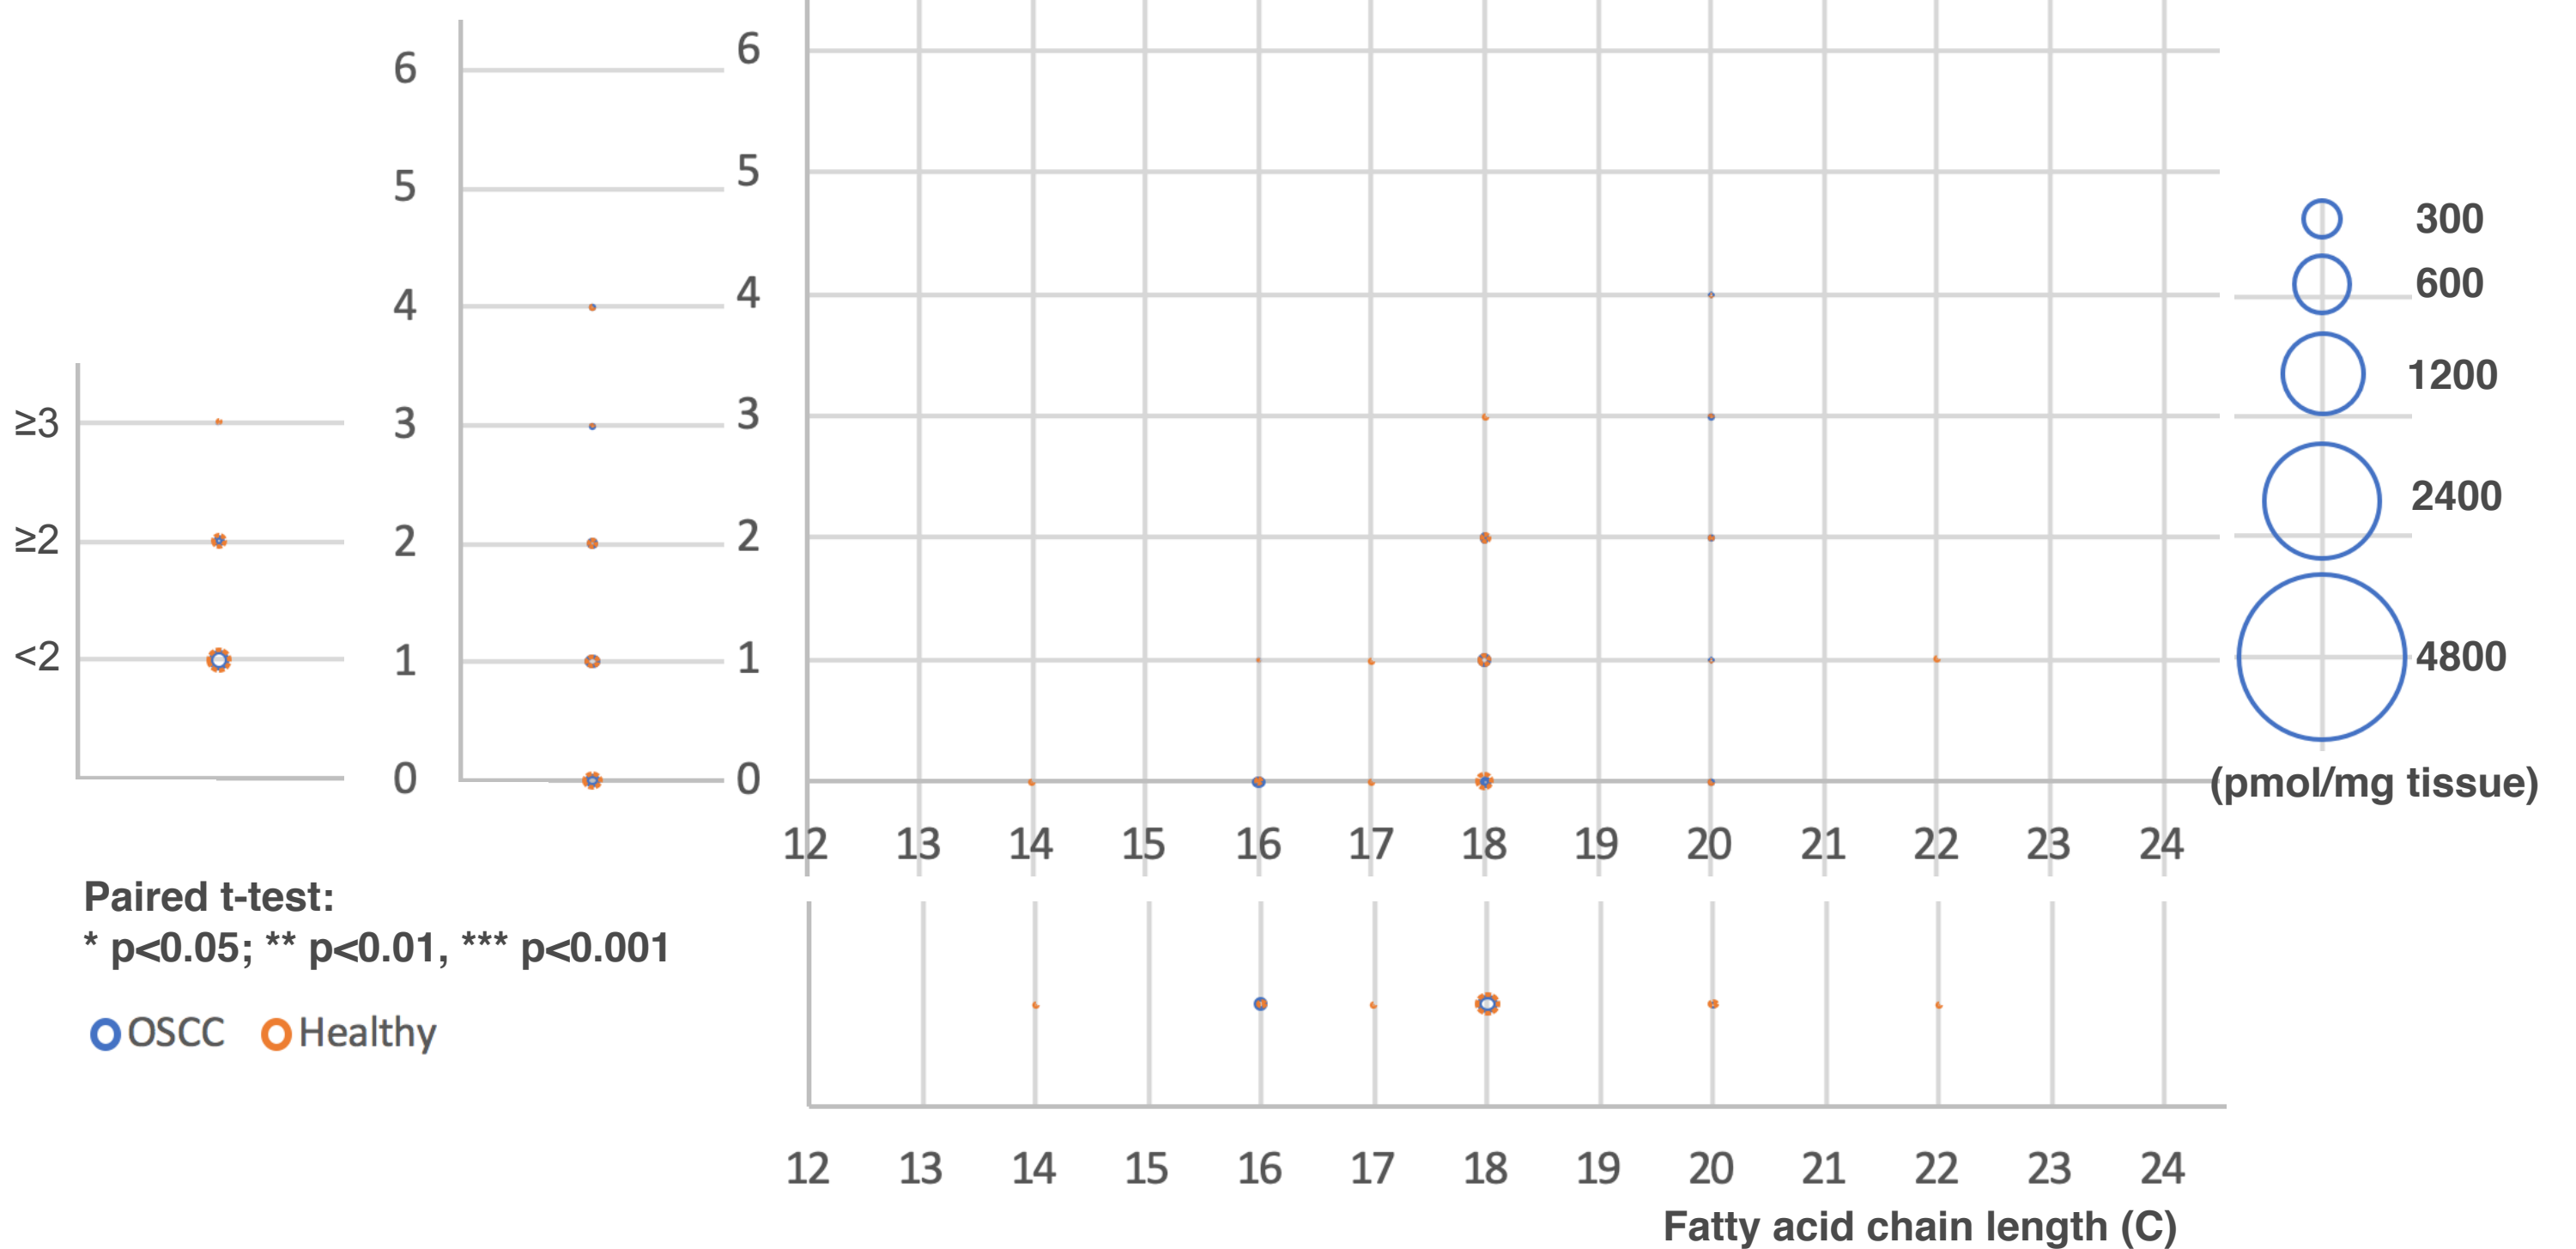

# Phosphatidic acid (PA) fatty acids (smaller scale)

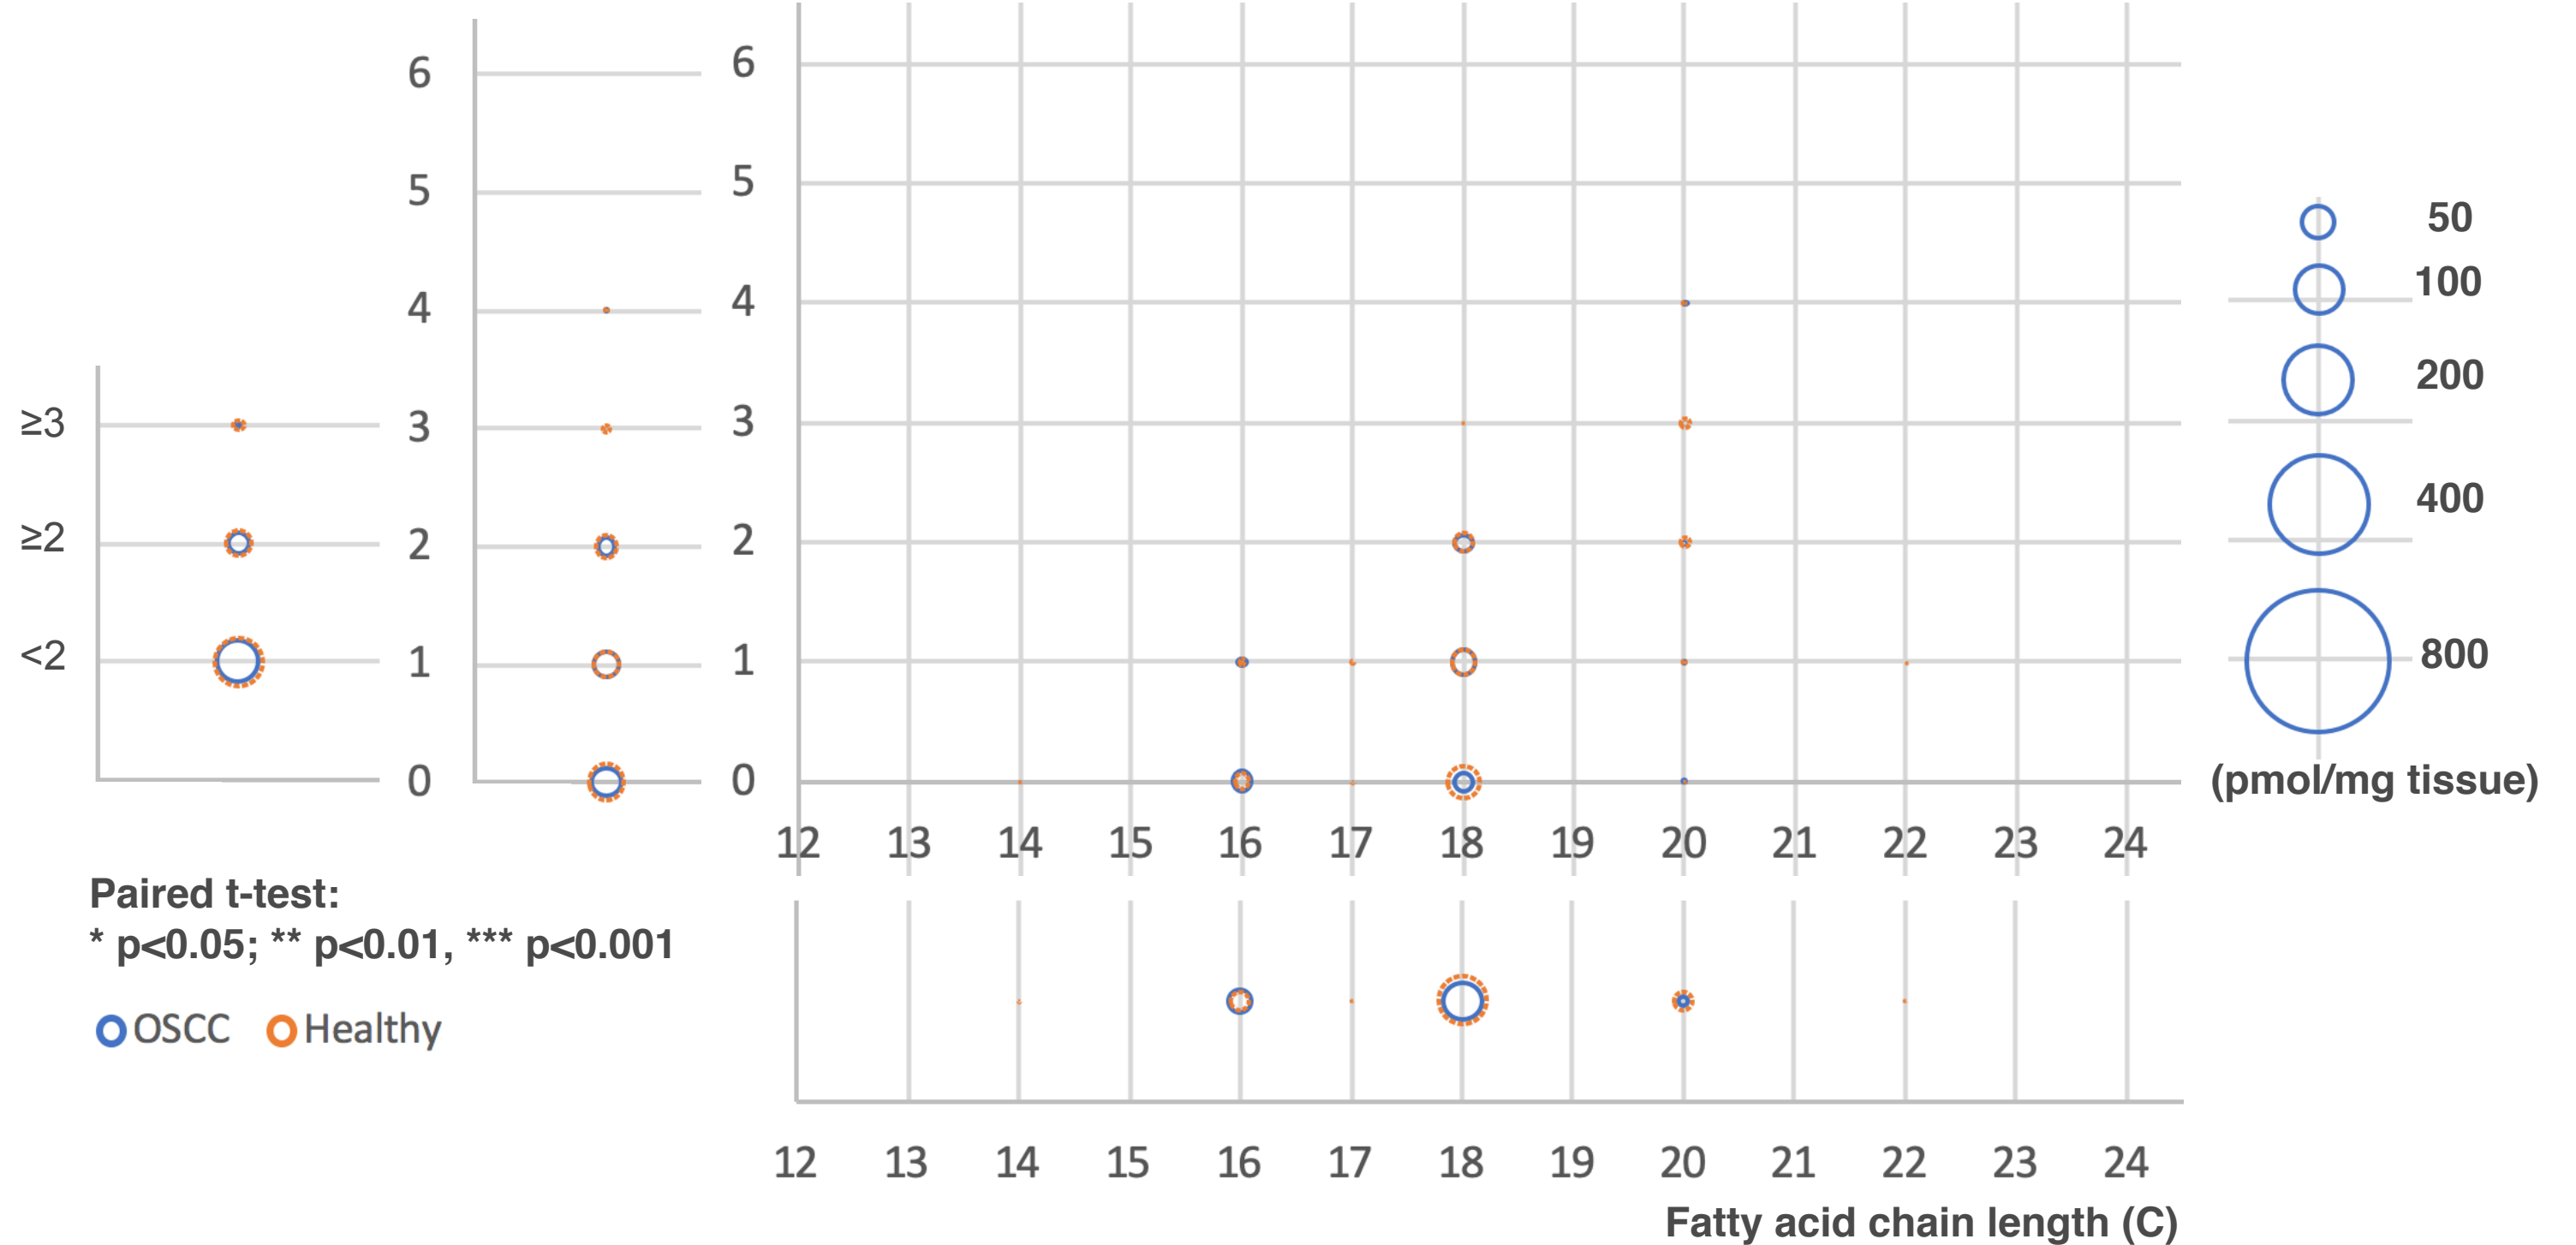

# Phosphatidylglycerol (PG) fatty acids

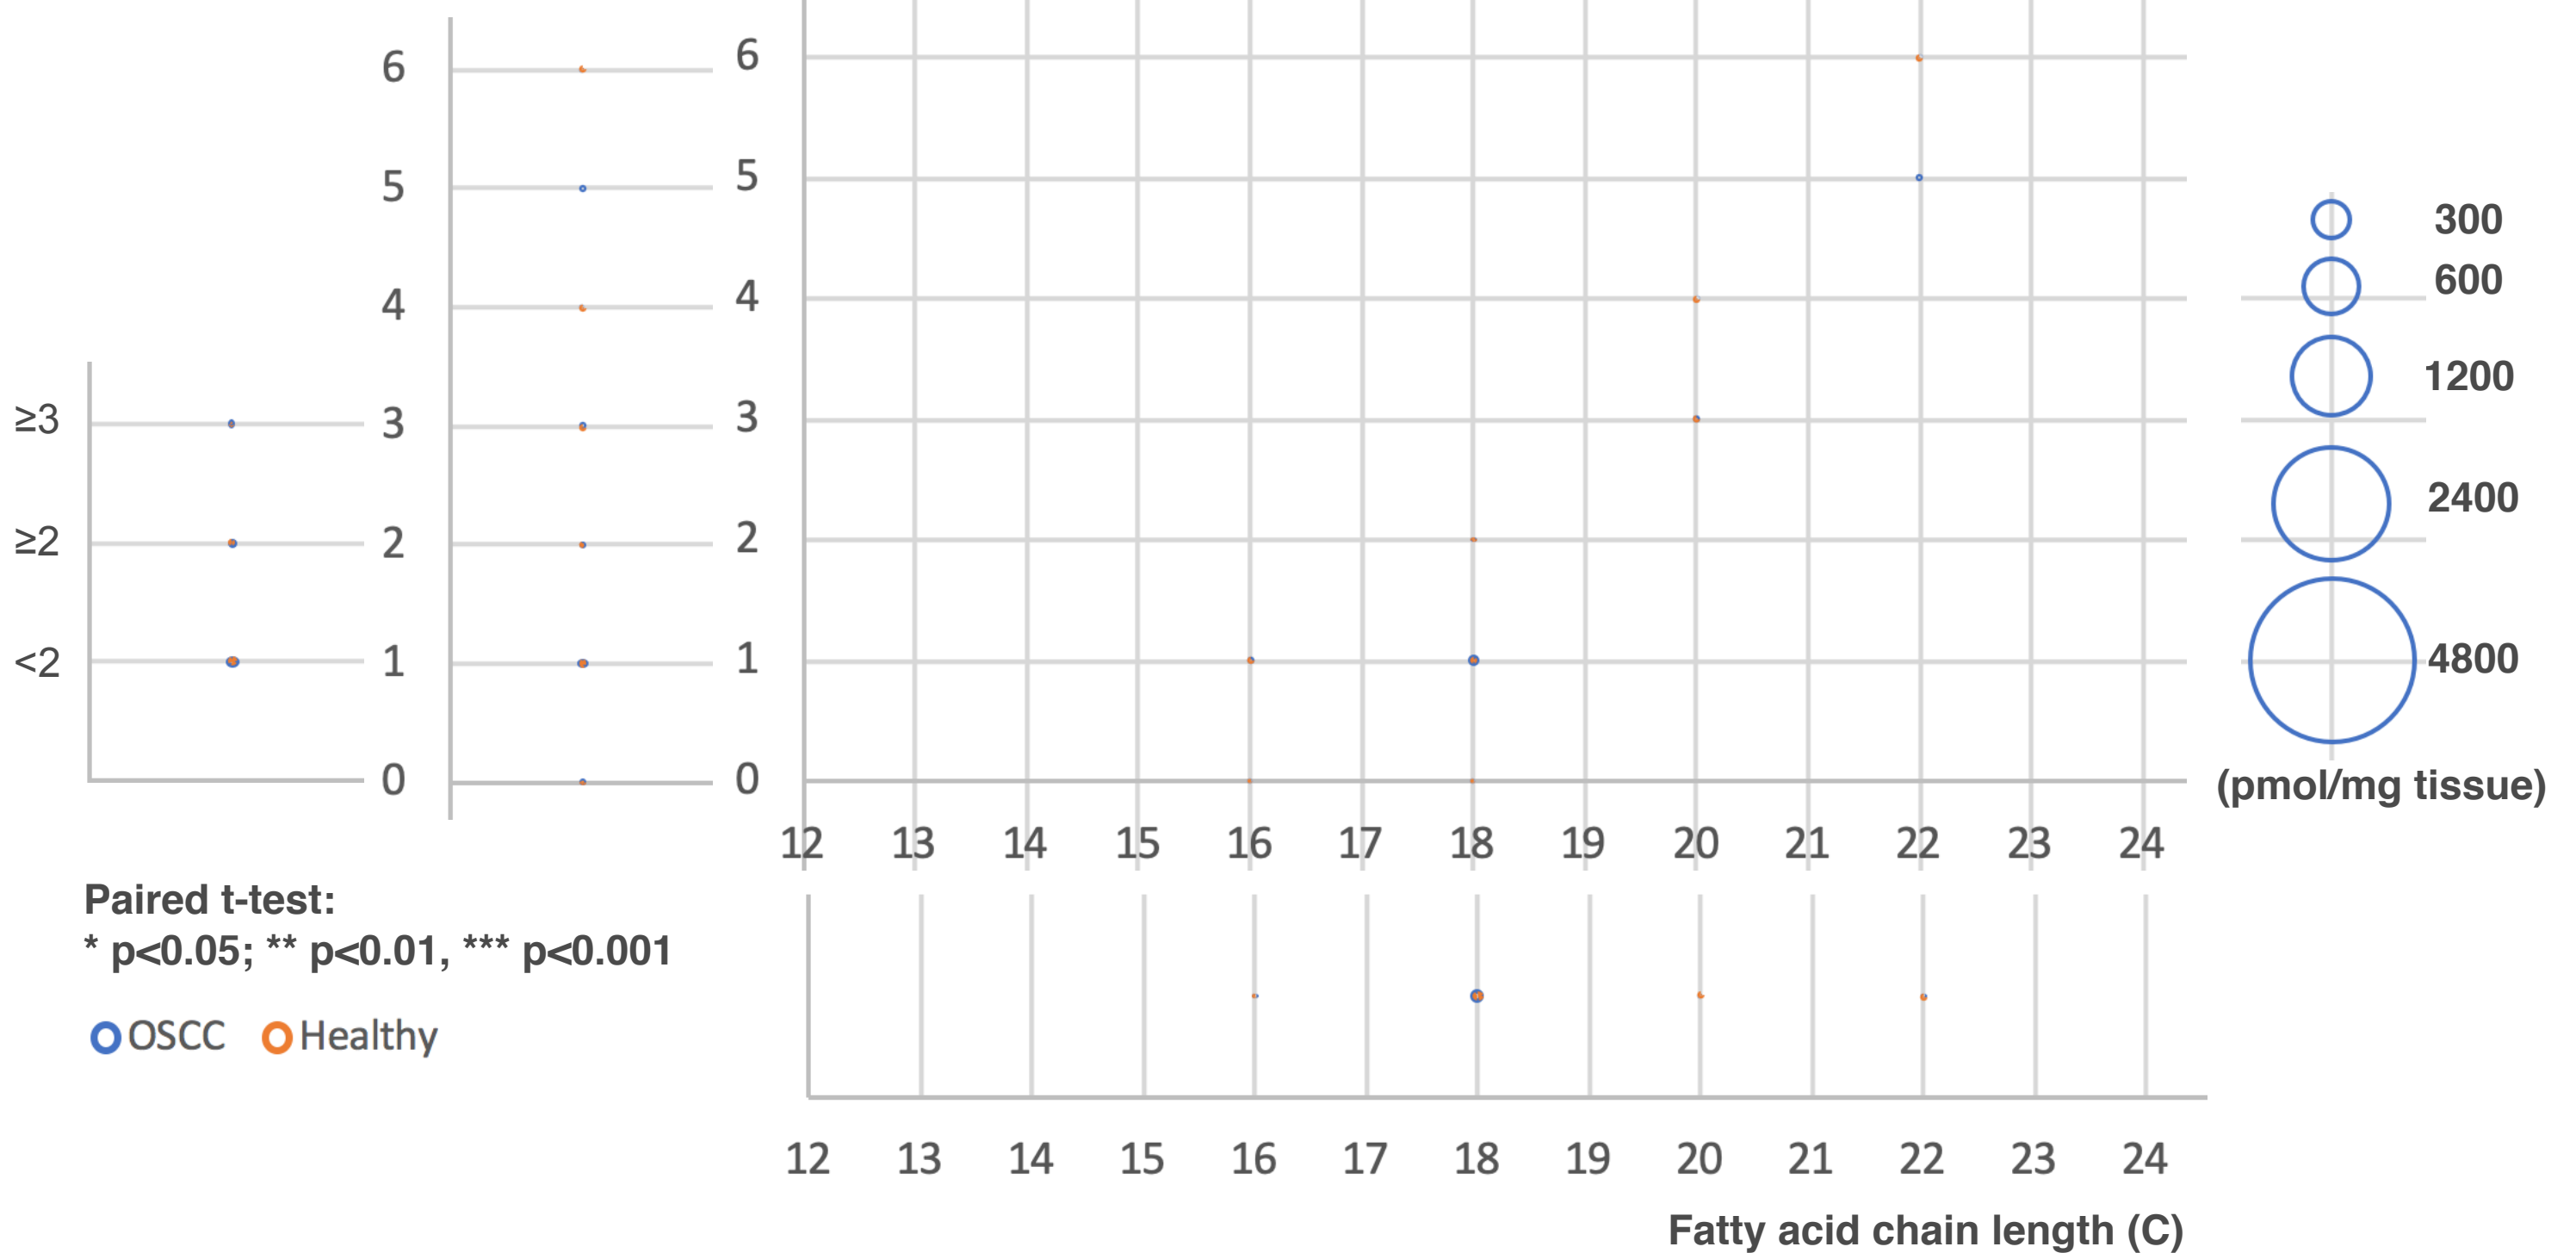

# Phosphatidylglycerol (PG) fatty acids (smaller scale)

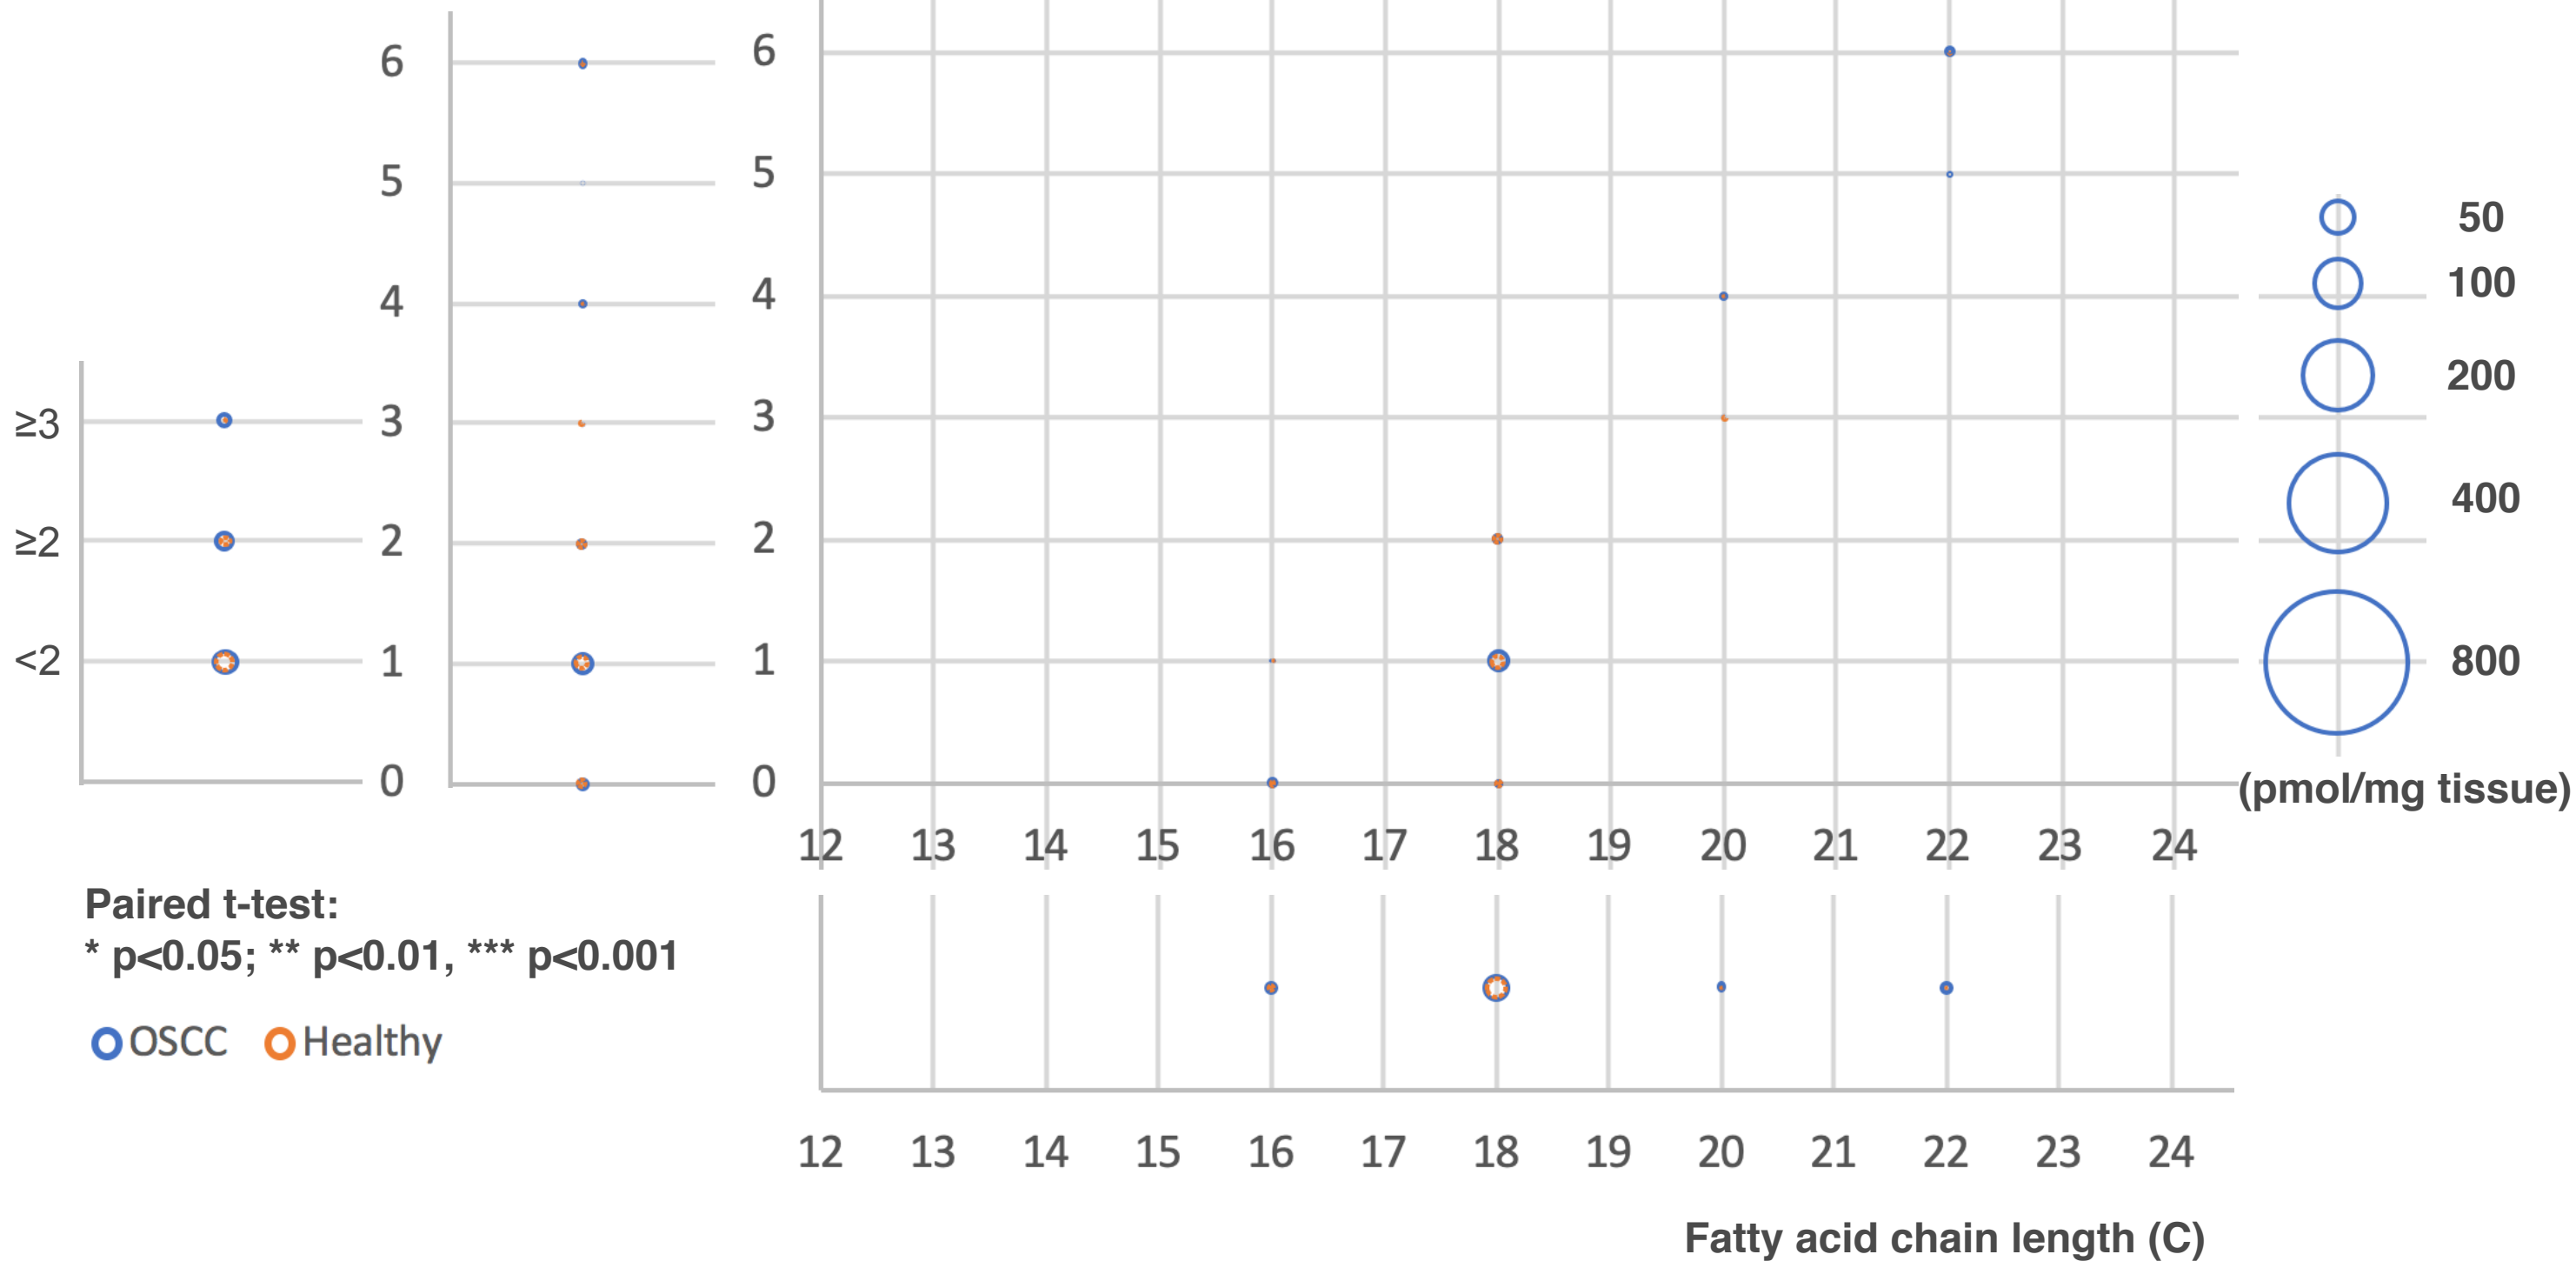

# Phosphatidylinositol (PI) fatty acids

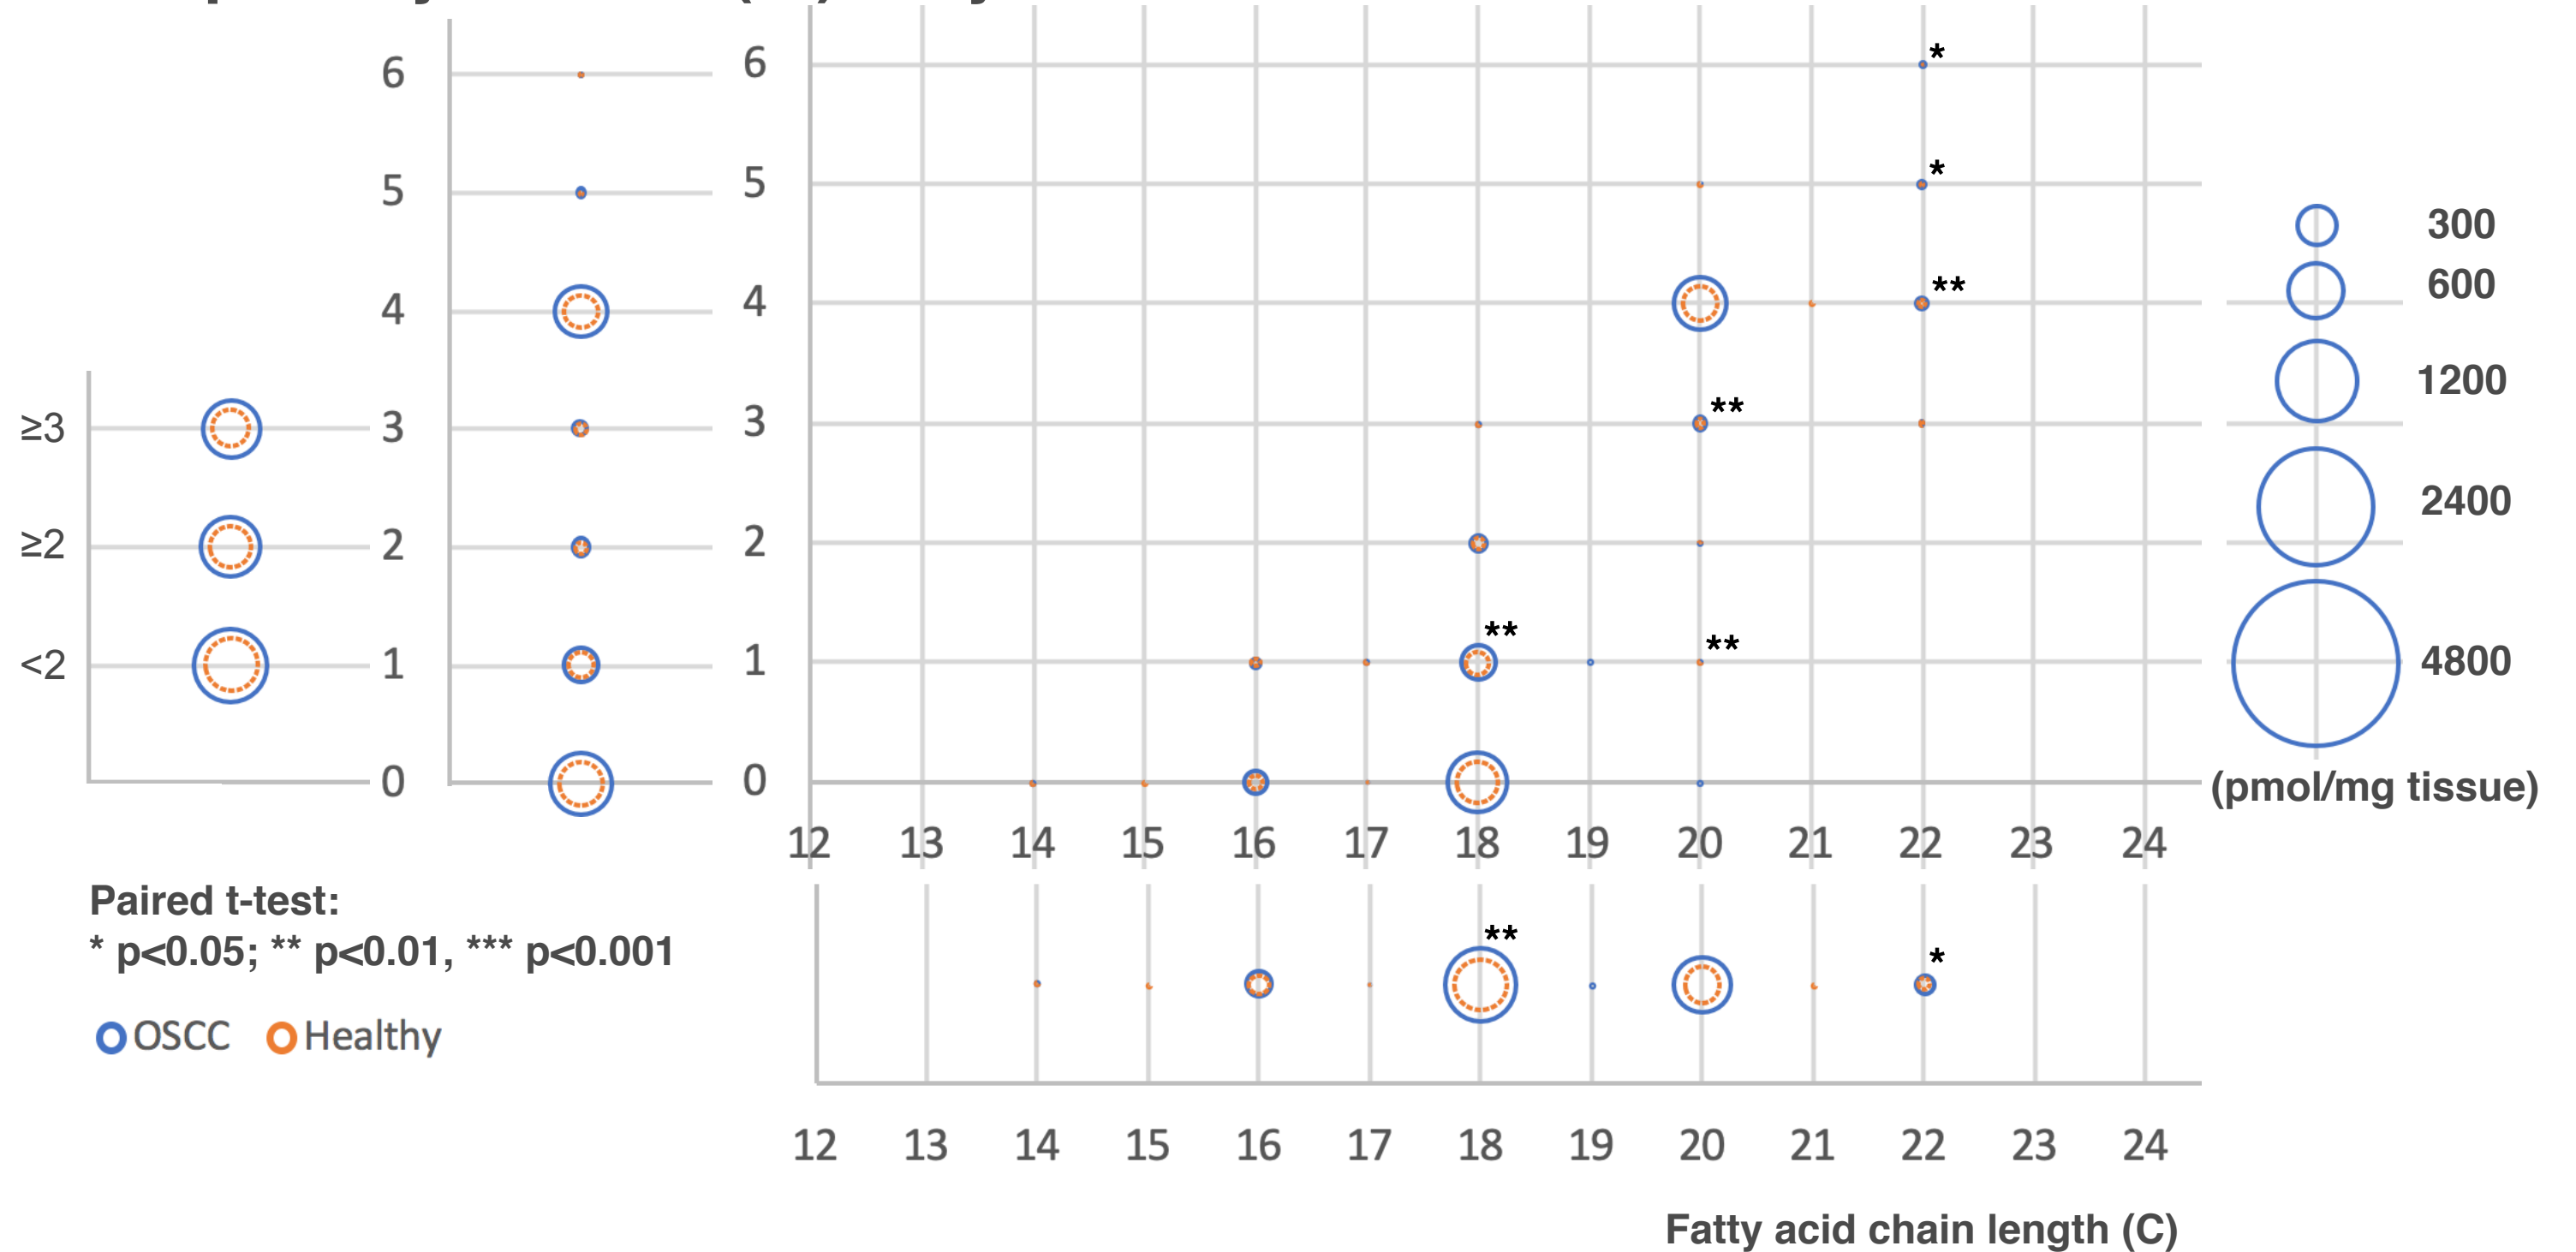

# Phosphatidylinositol (PI) fatty acids (smaller scale)

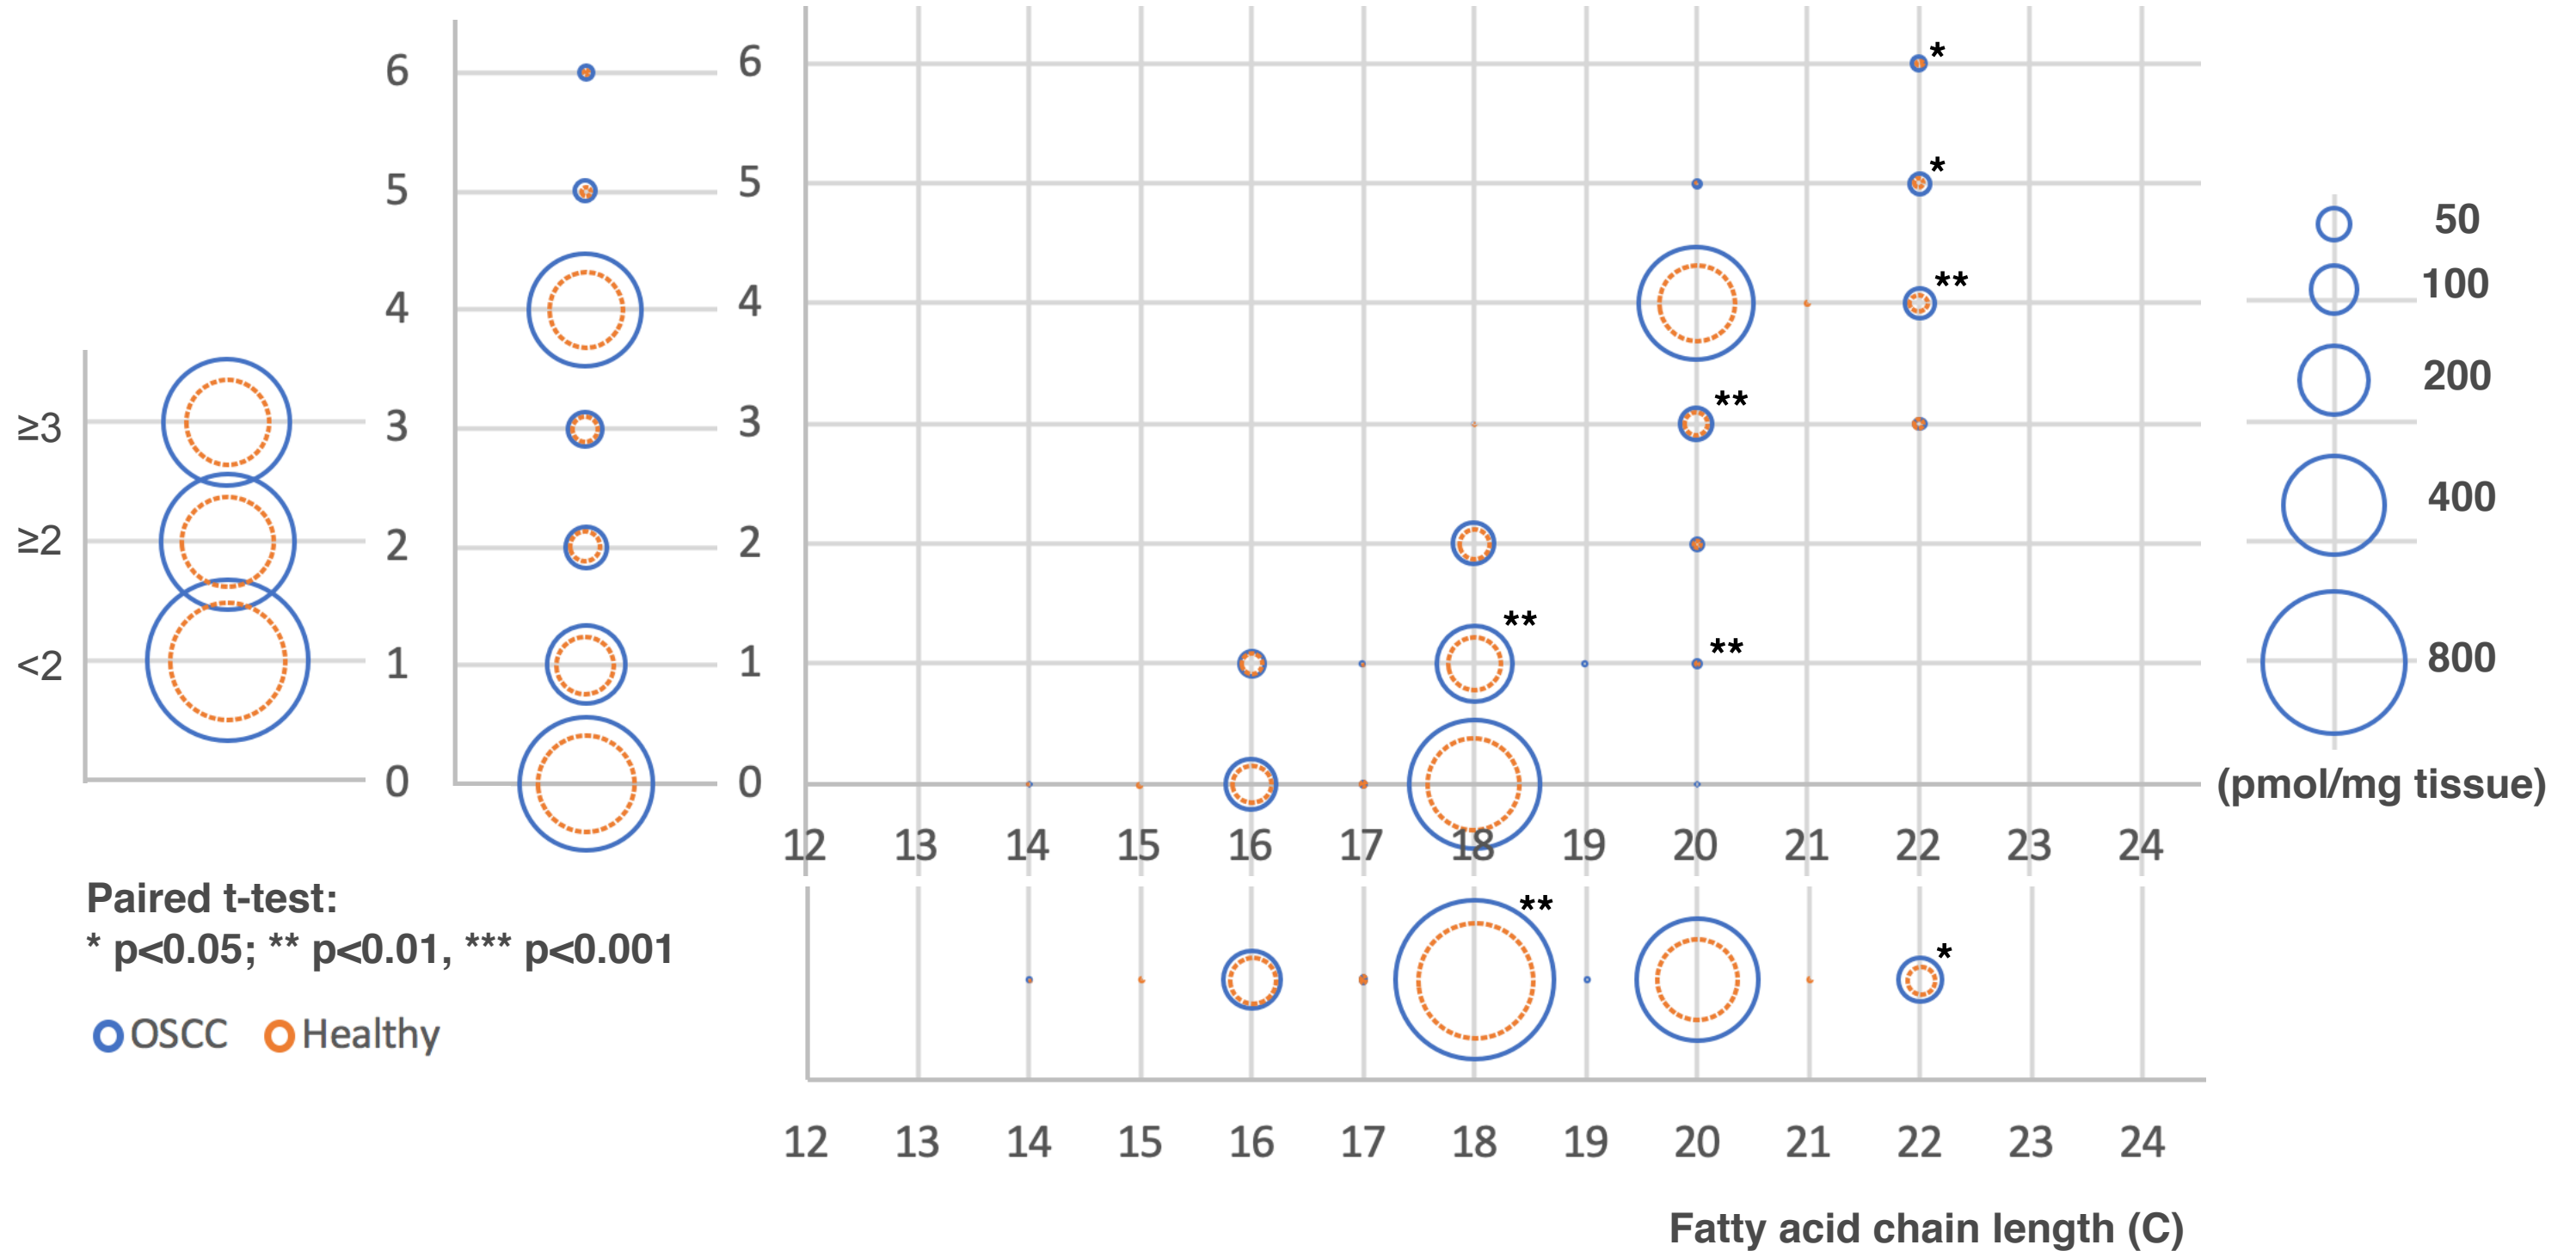

# Phosphatidylserine (PS) fatty acids

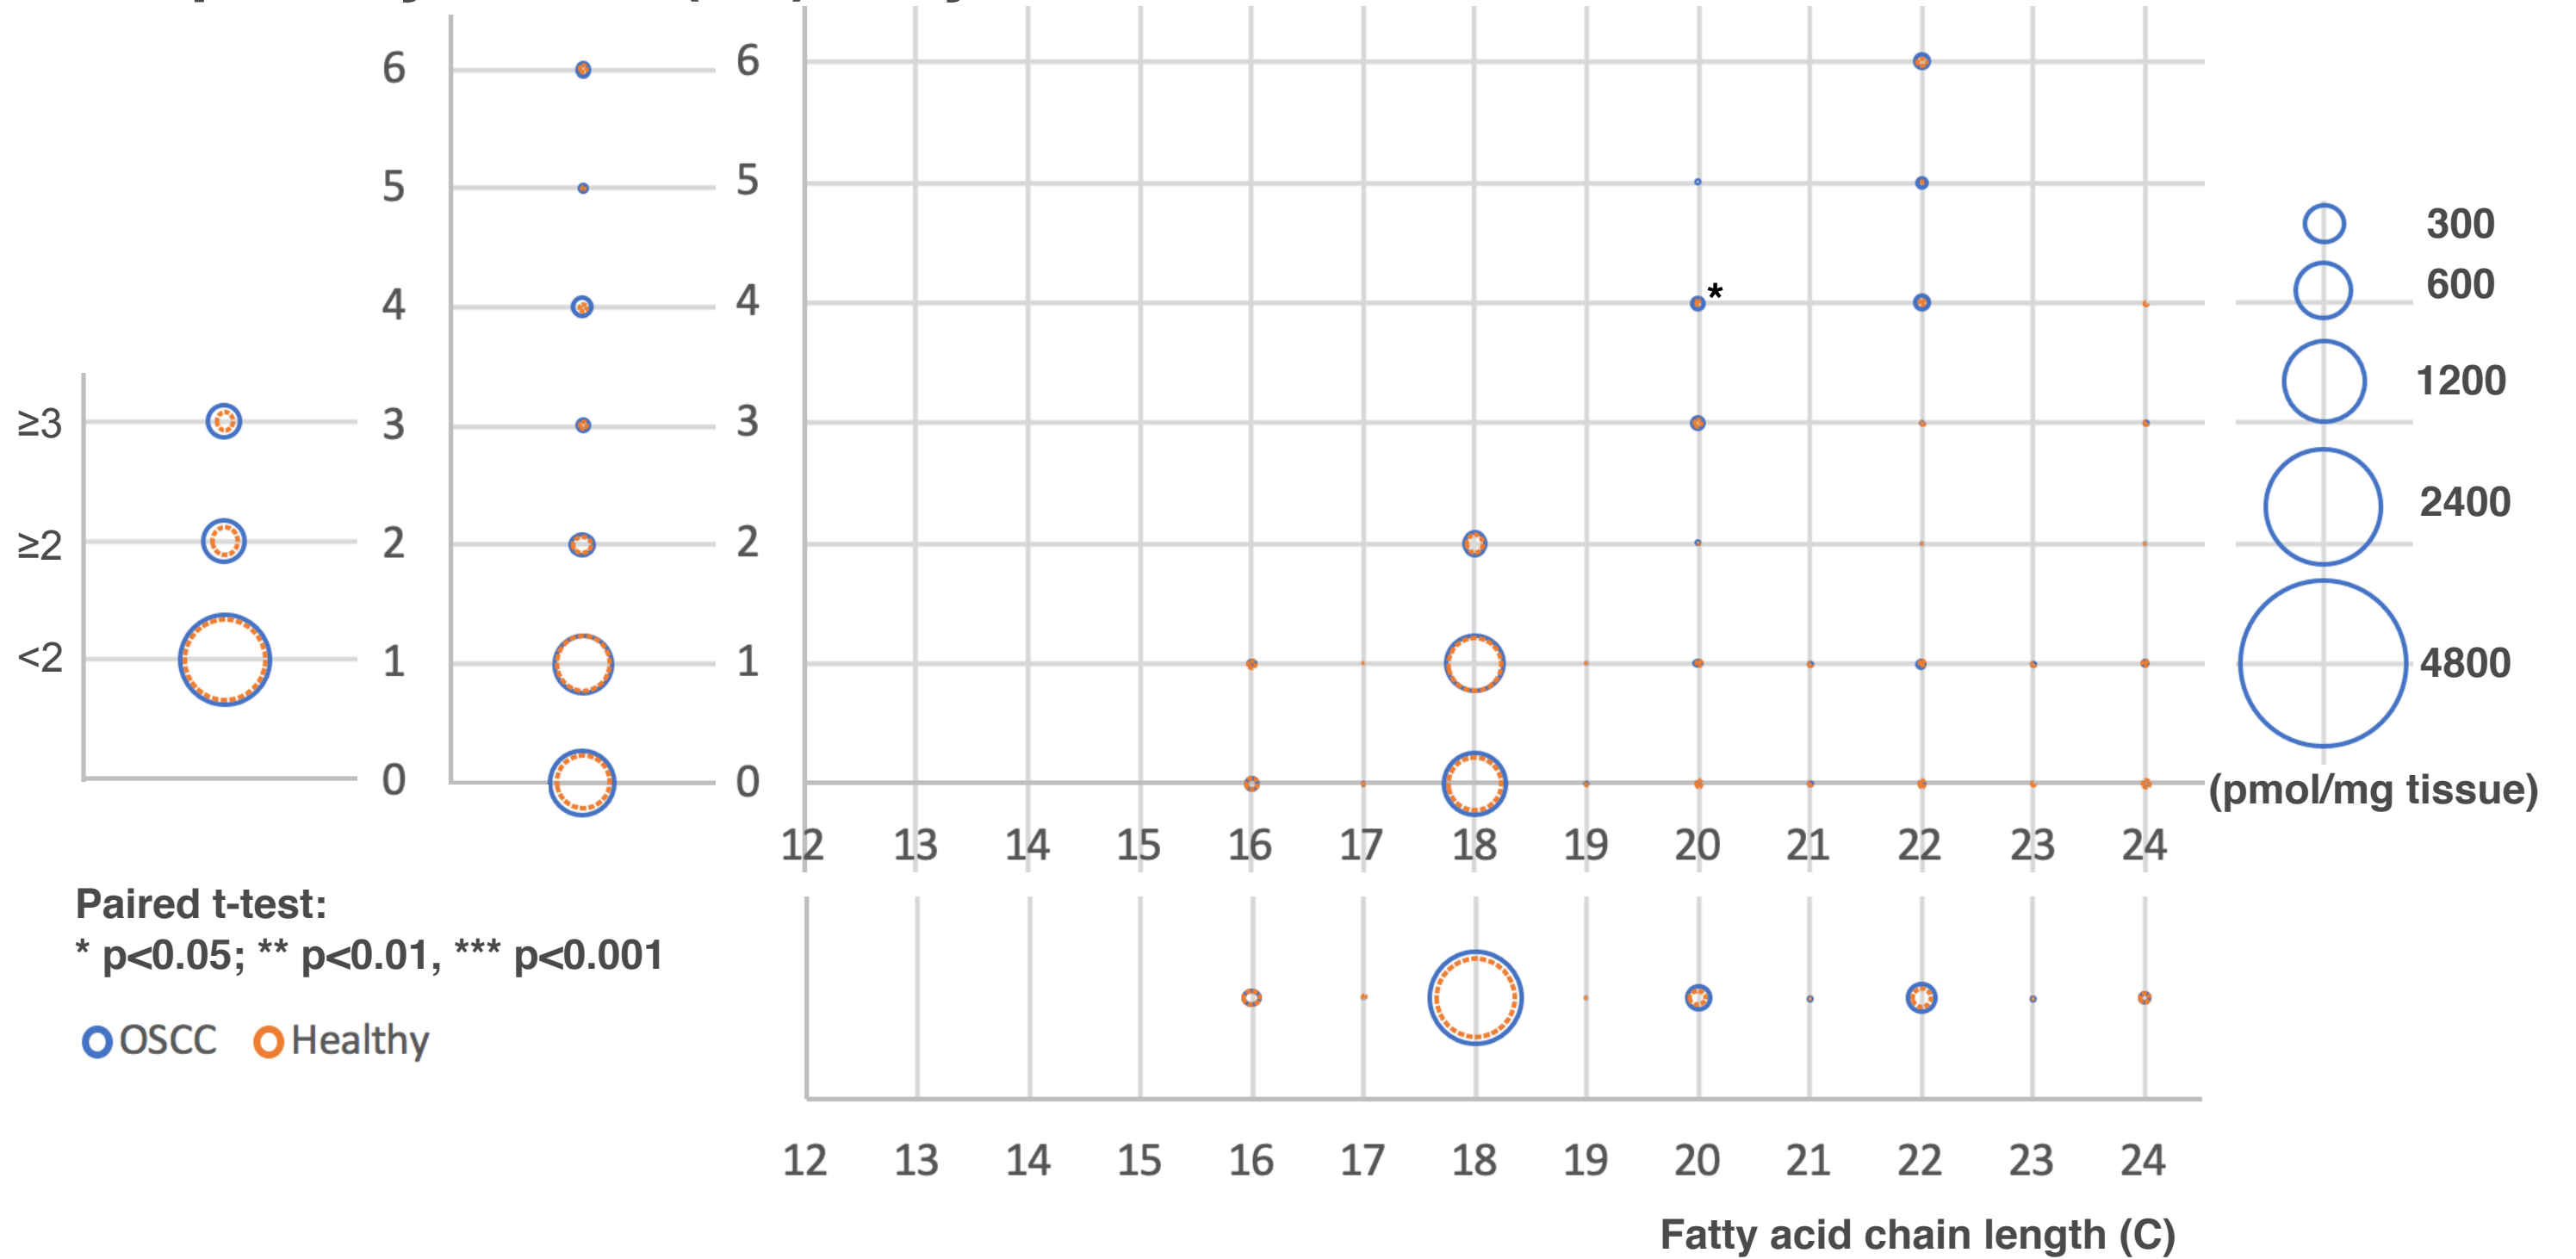

# Phosphatidylserine (PS) fatty acids (smaller scale)

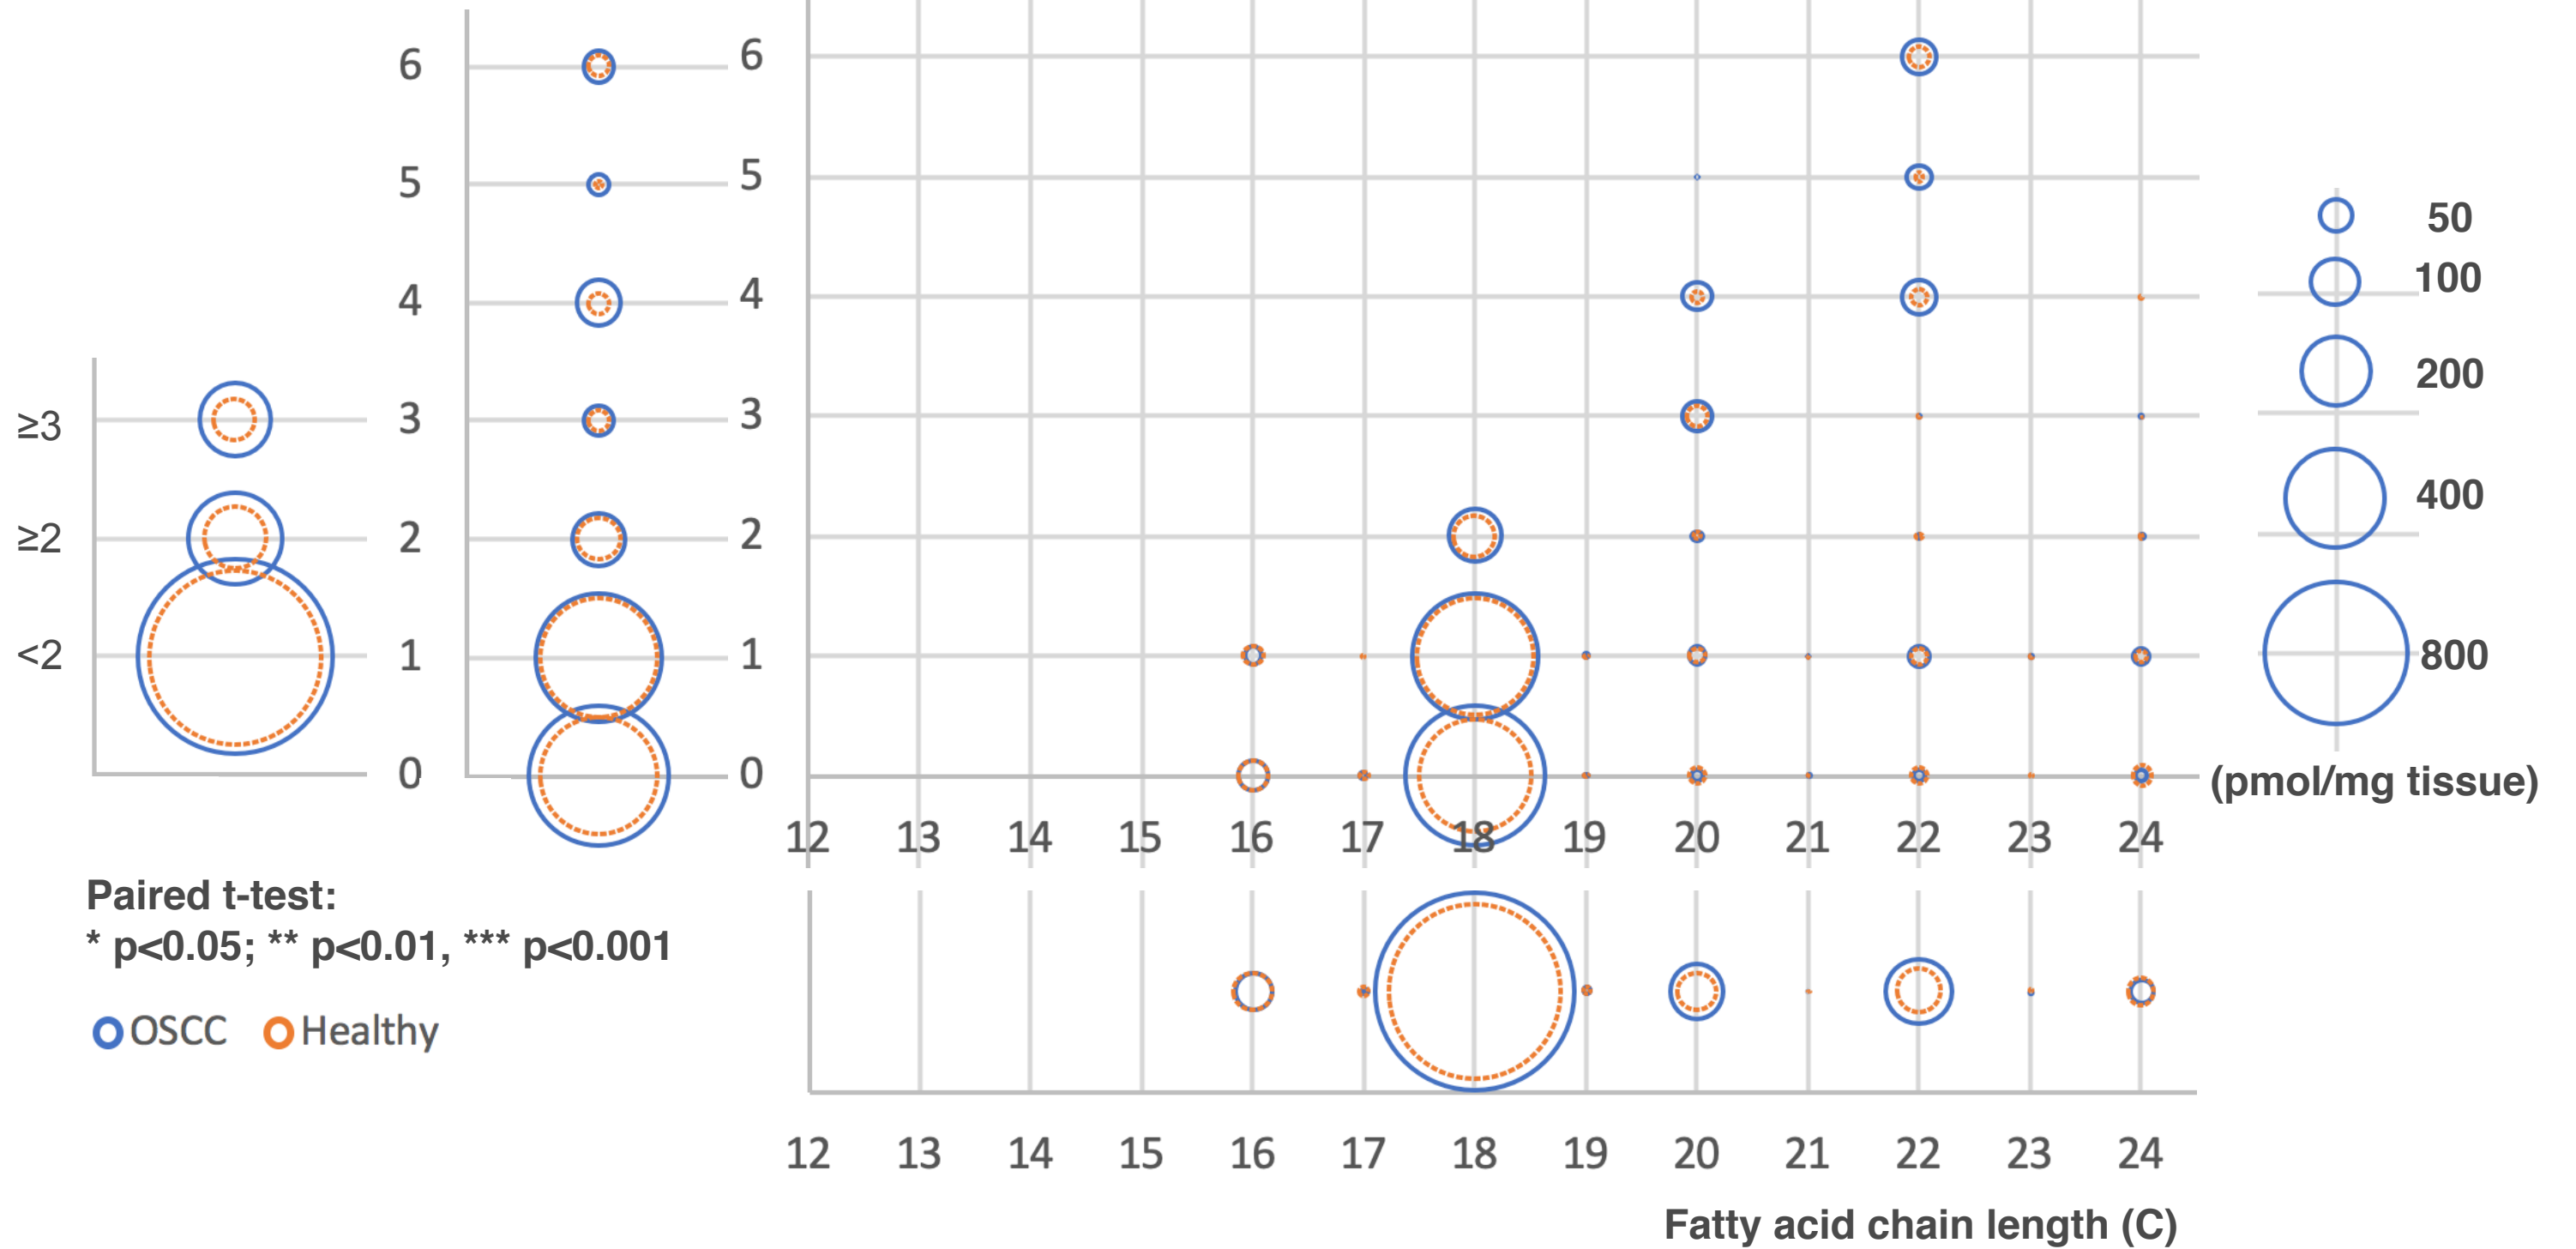



# Phosphatidylethanolamine (PE) fatty acids

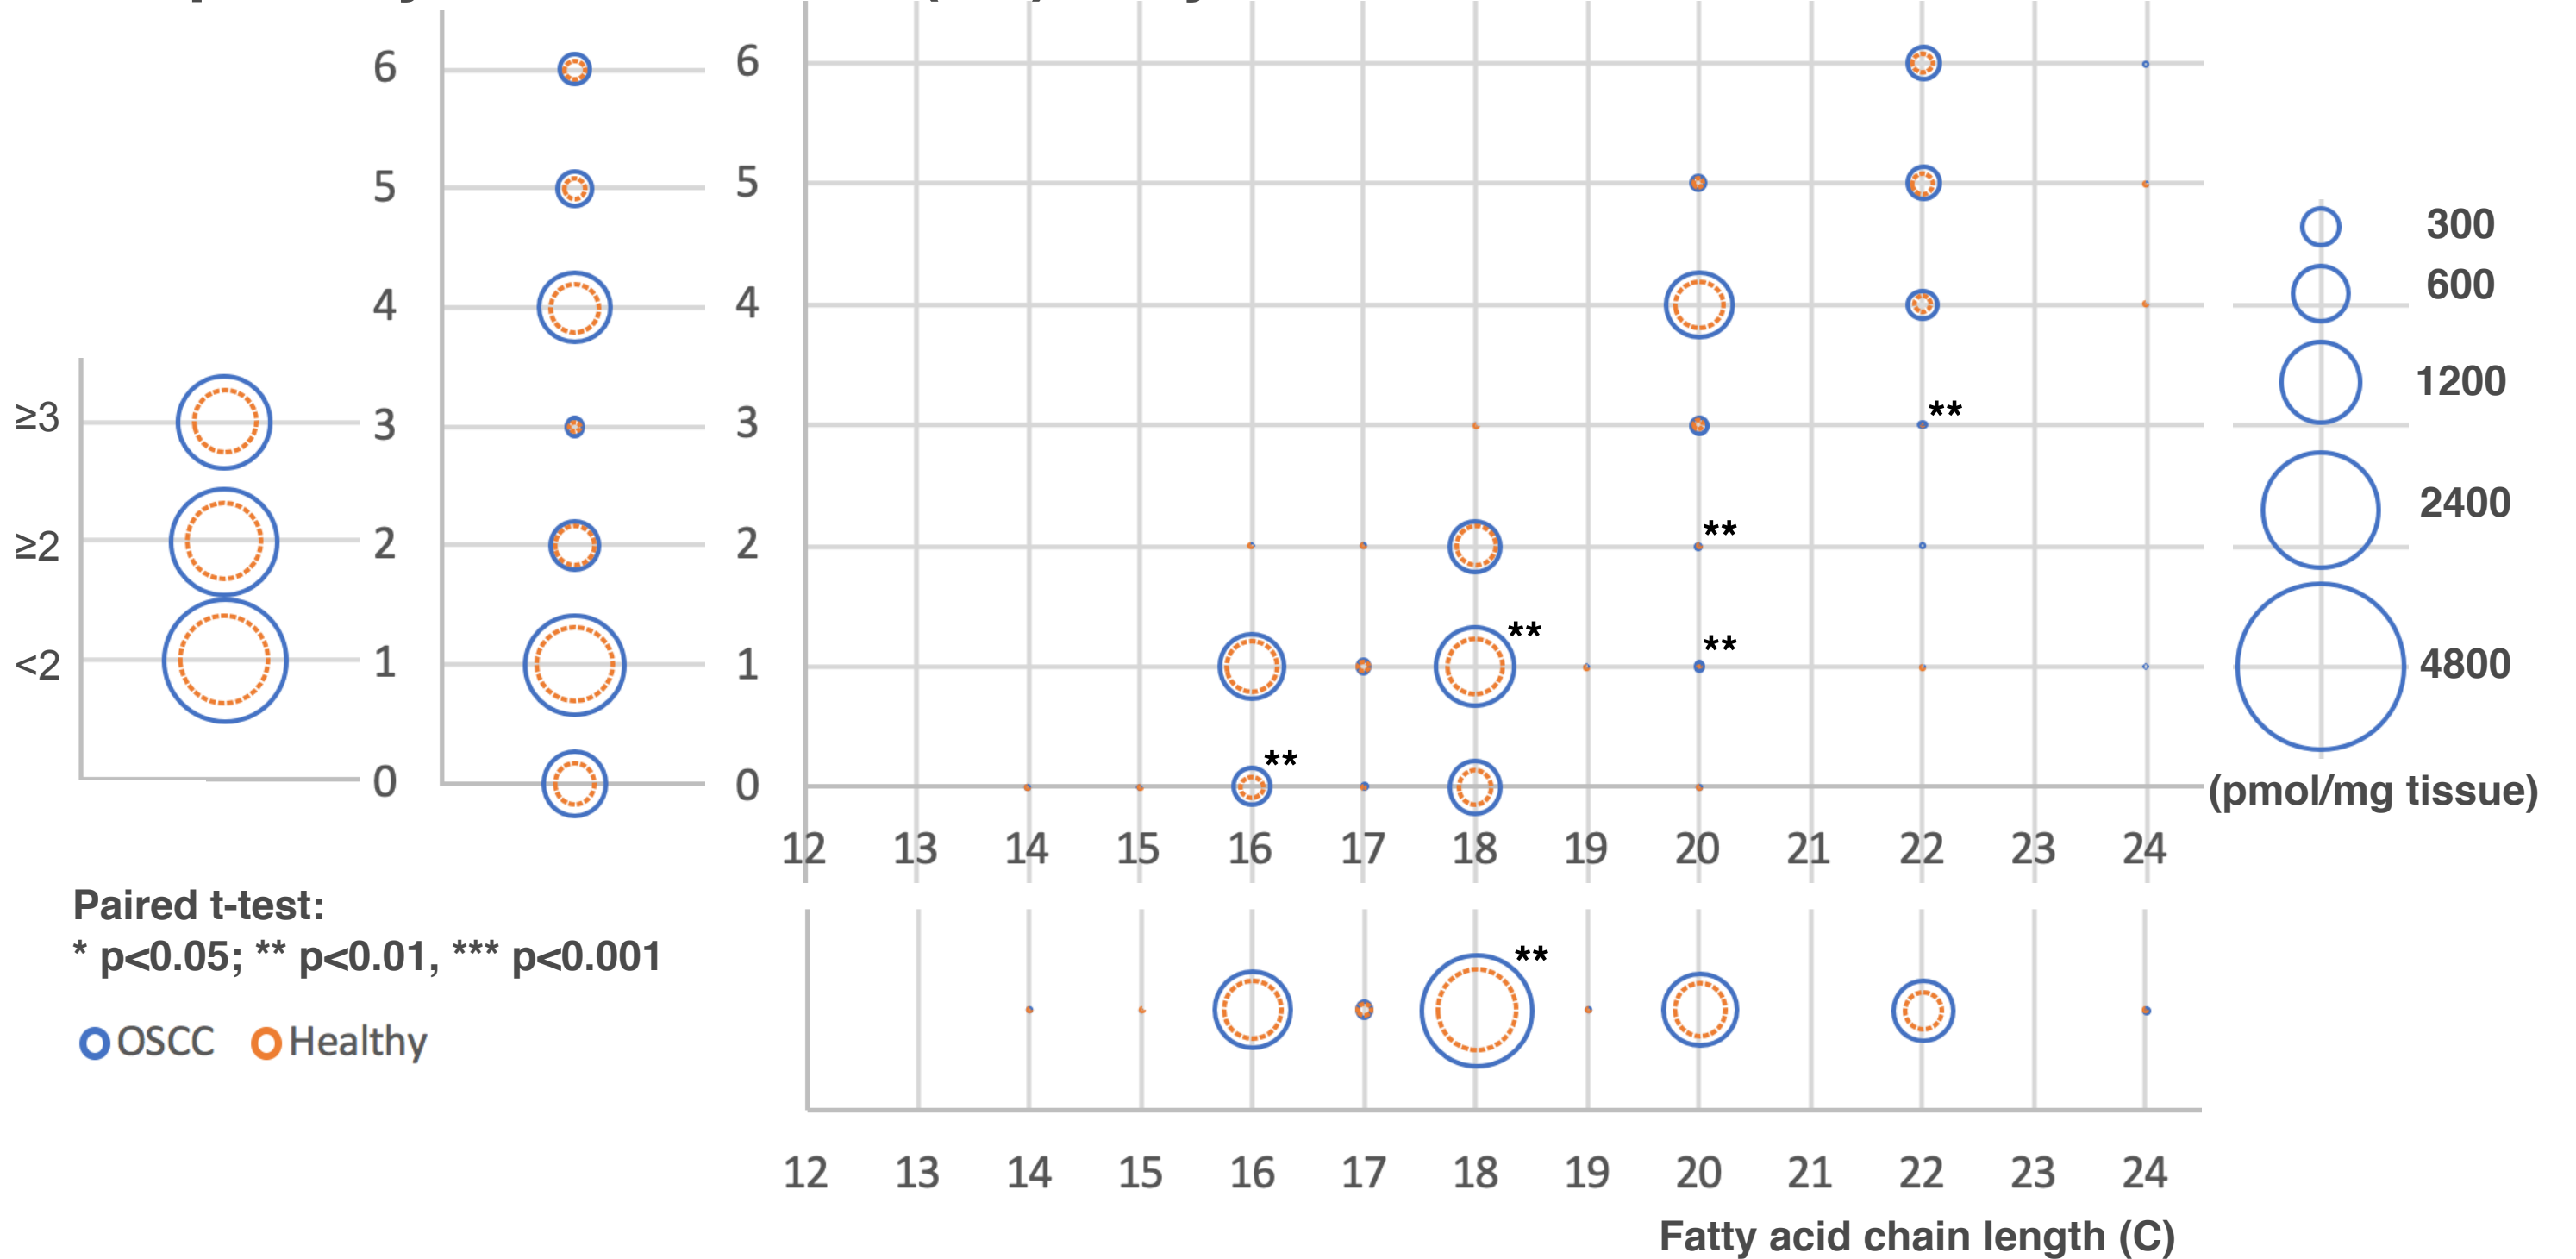

# Phosphatidylcholine (PC) fatty acids

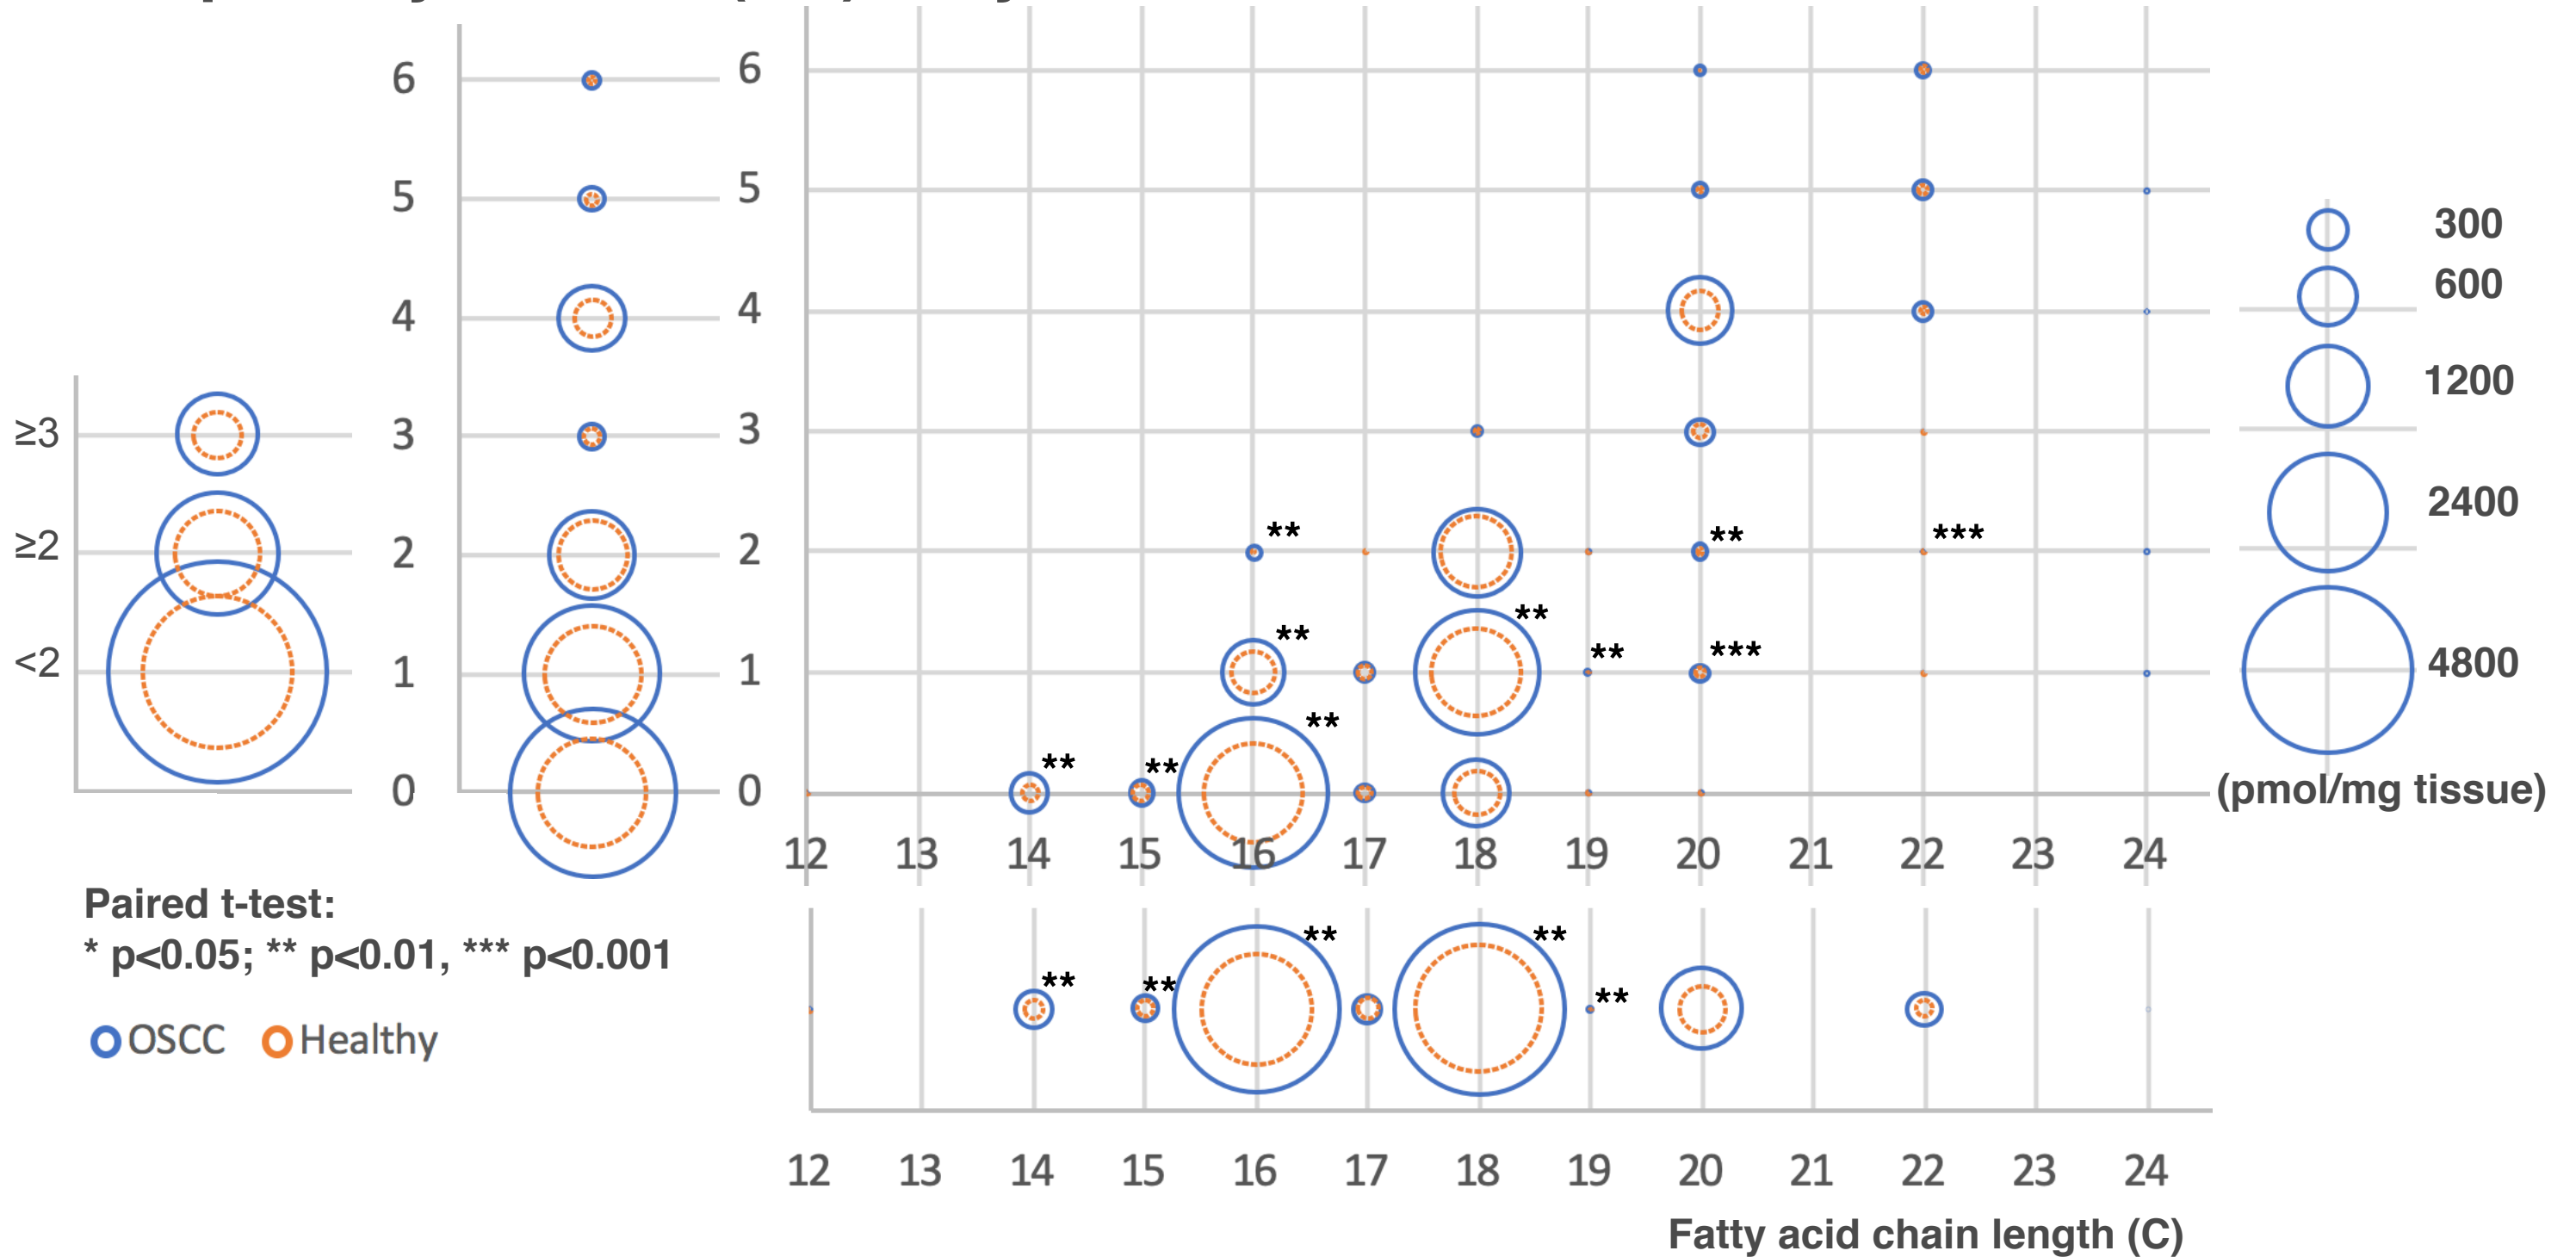

Supplement: mmc15.pdf [file mmc15.pdf]
