# Supplementary figures and images for: Mass Spectrometry–Based Lipidomics of Oral Squamous Cell Carcinoma Tissue Reveals Aberrant Cholesterol and Glycerophospholipid Metabolism — A Pilot Study
Source: PubMed Central journal article supplement — Transl Oncol. 2020 Jun 16;13(10):100807. doi: 10.1016/j.tranon.2020.100807 (PMC7303674; doi:10.1016/j.tranon.2020.100807), 2020-06-16

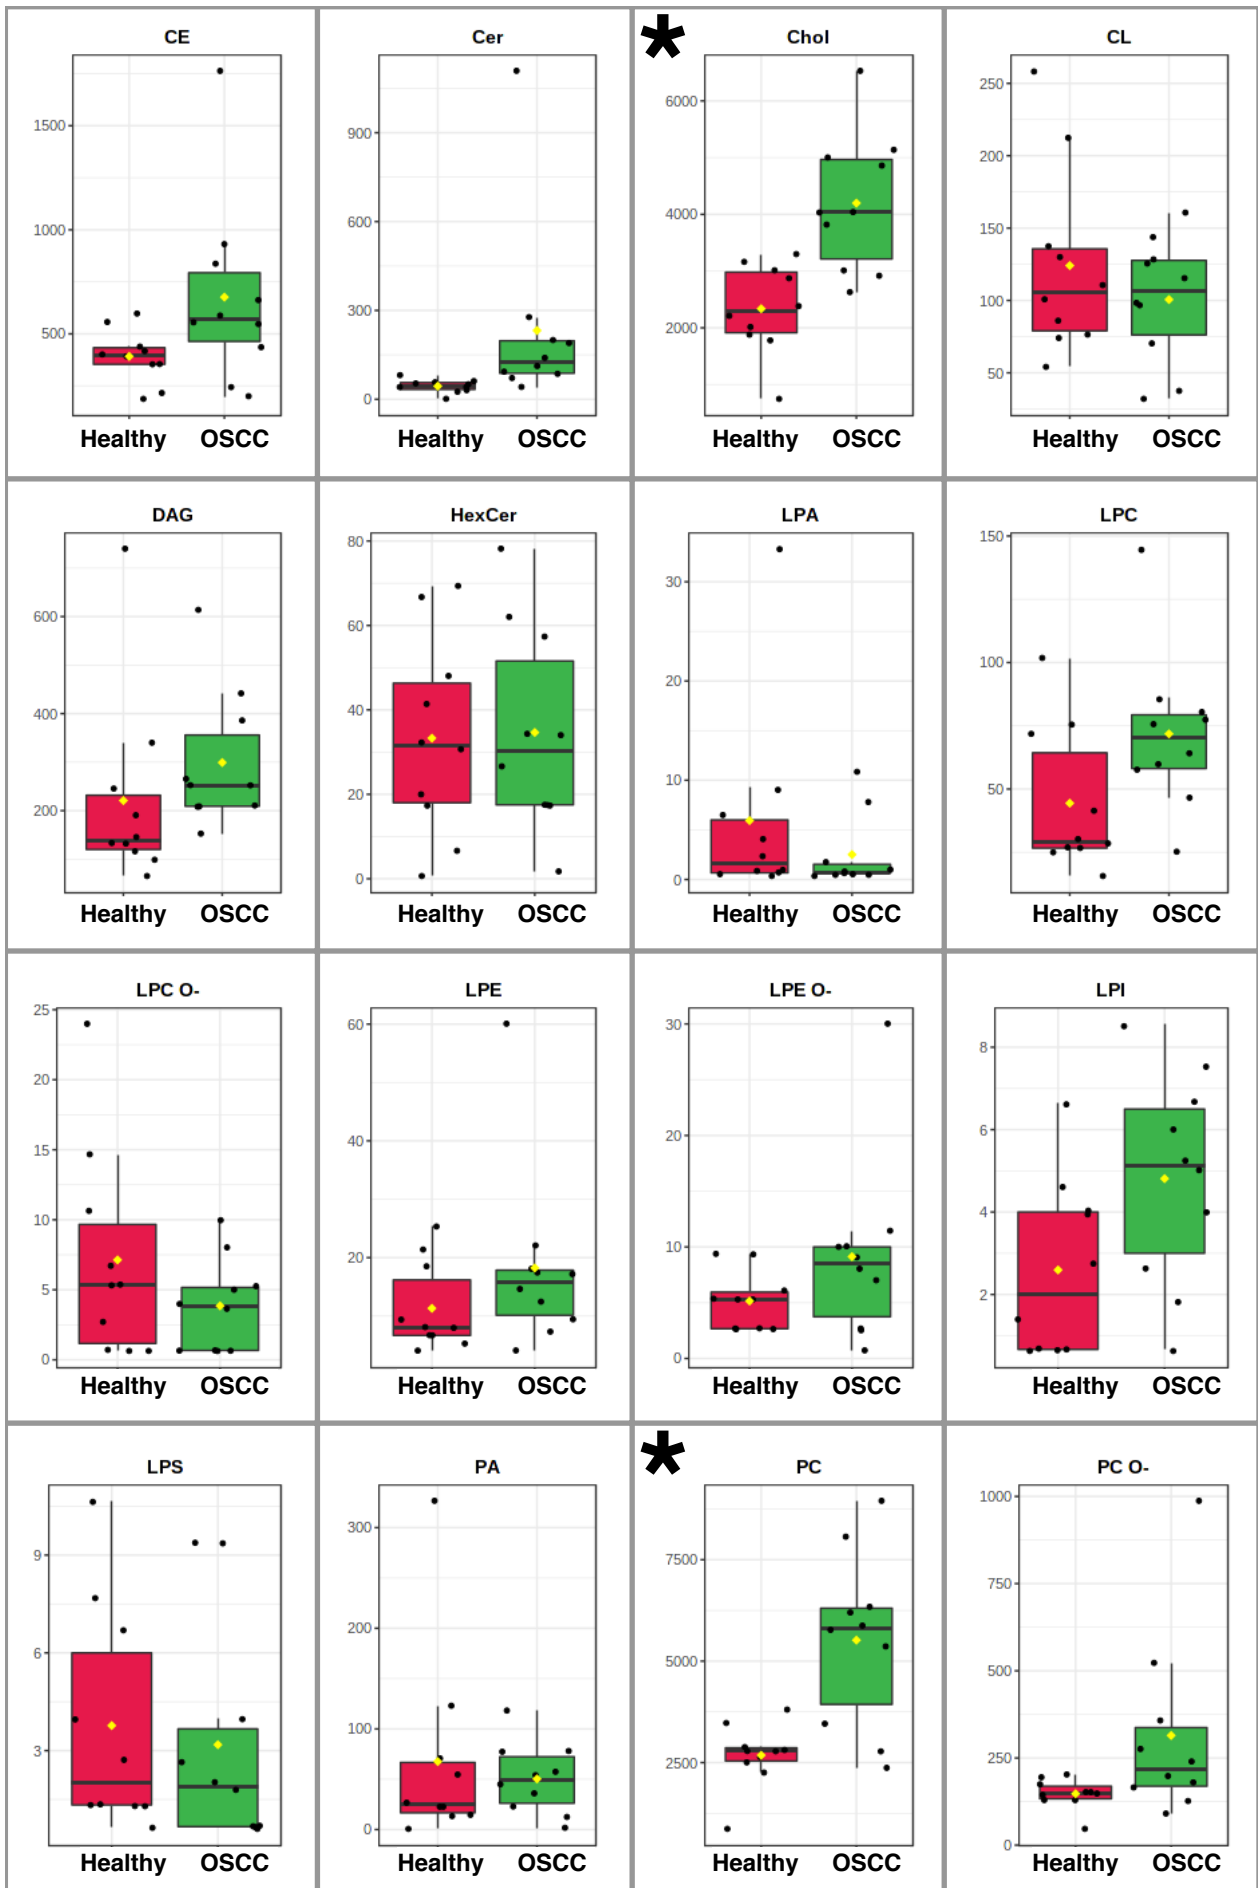

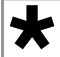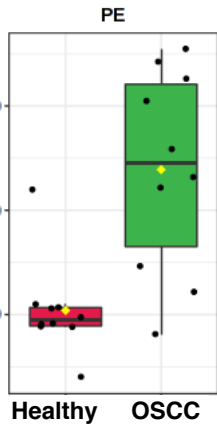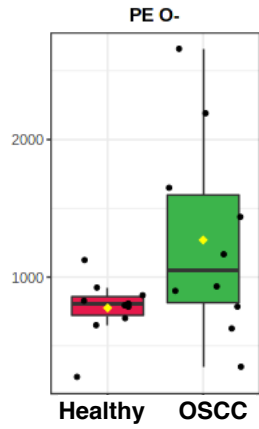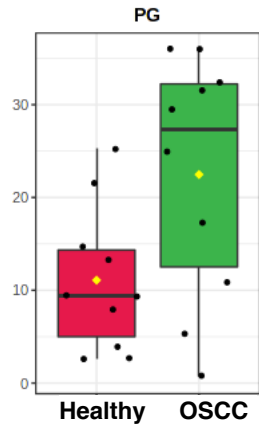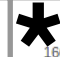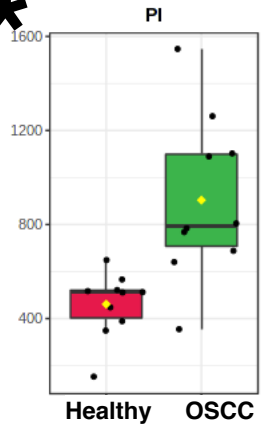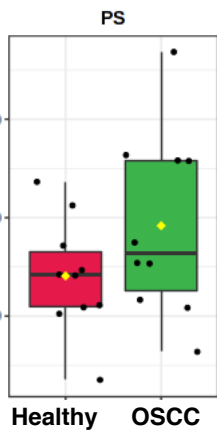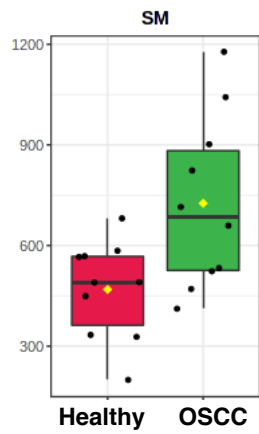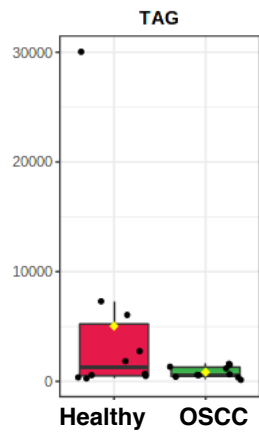

Supplement: mmc10.pdf [file mmc10.pdf]

species

Scores Plot

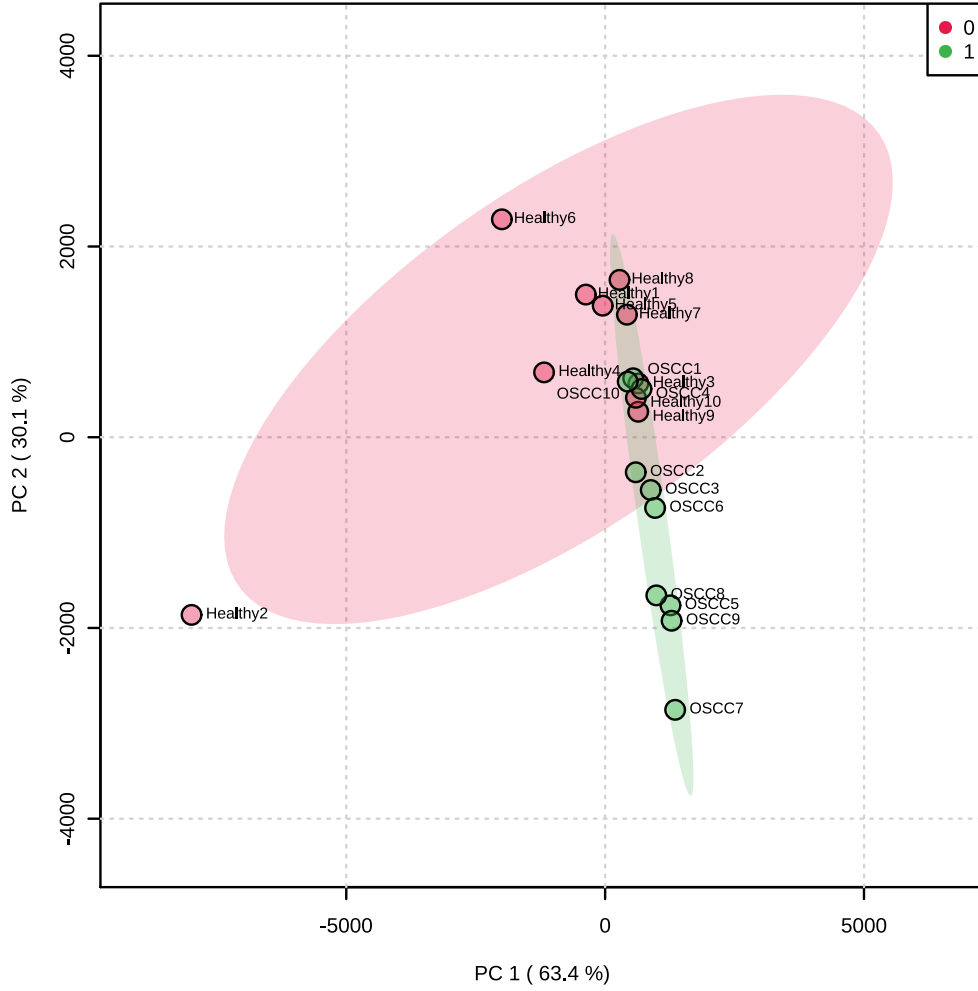

Scores Plot

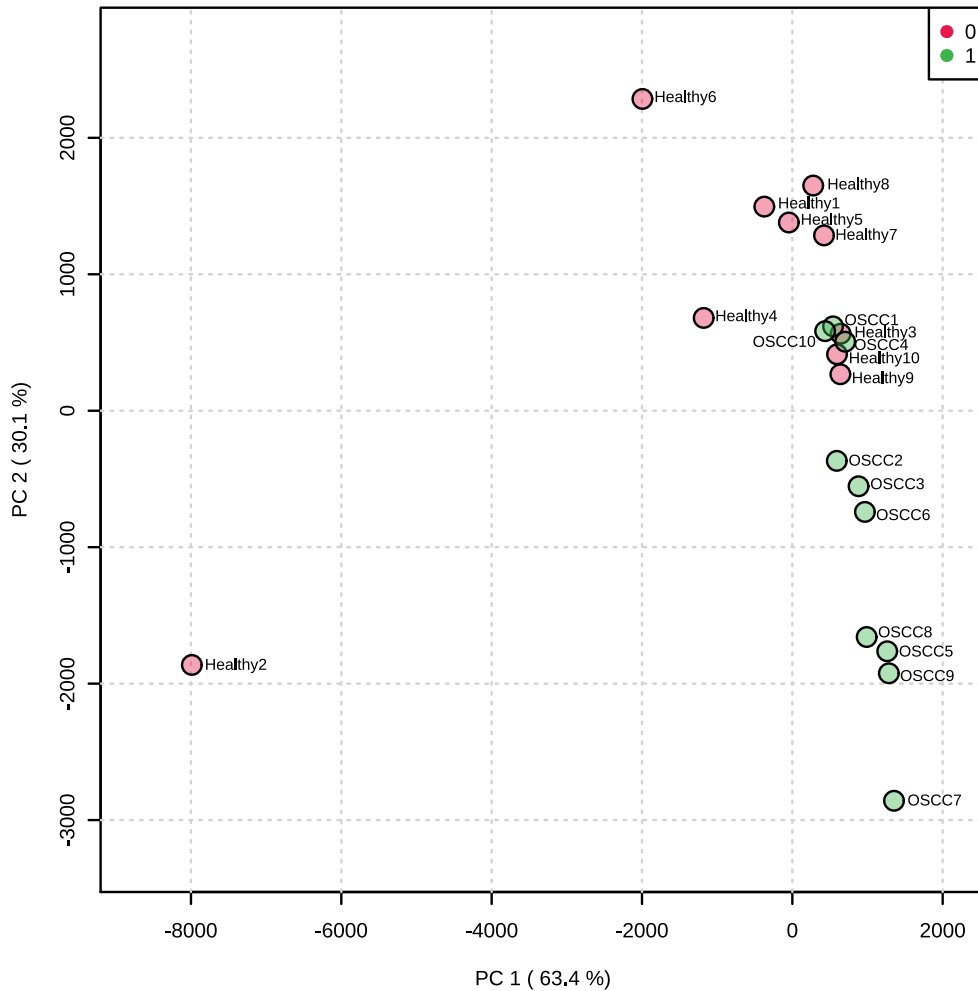



species

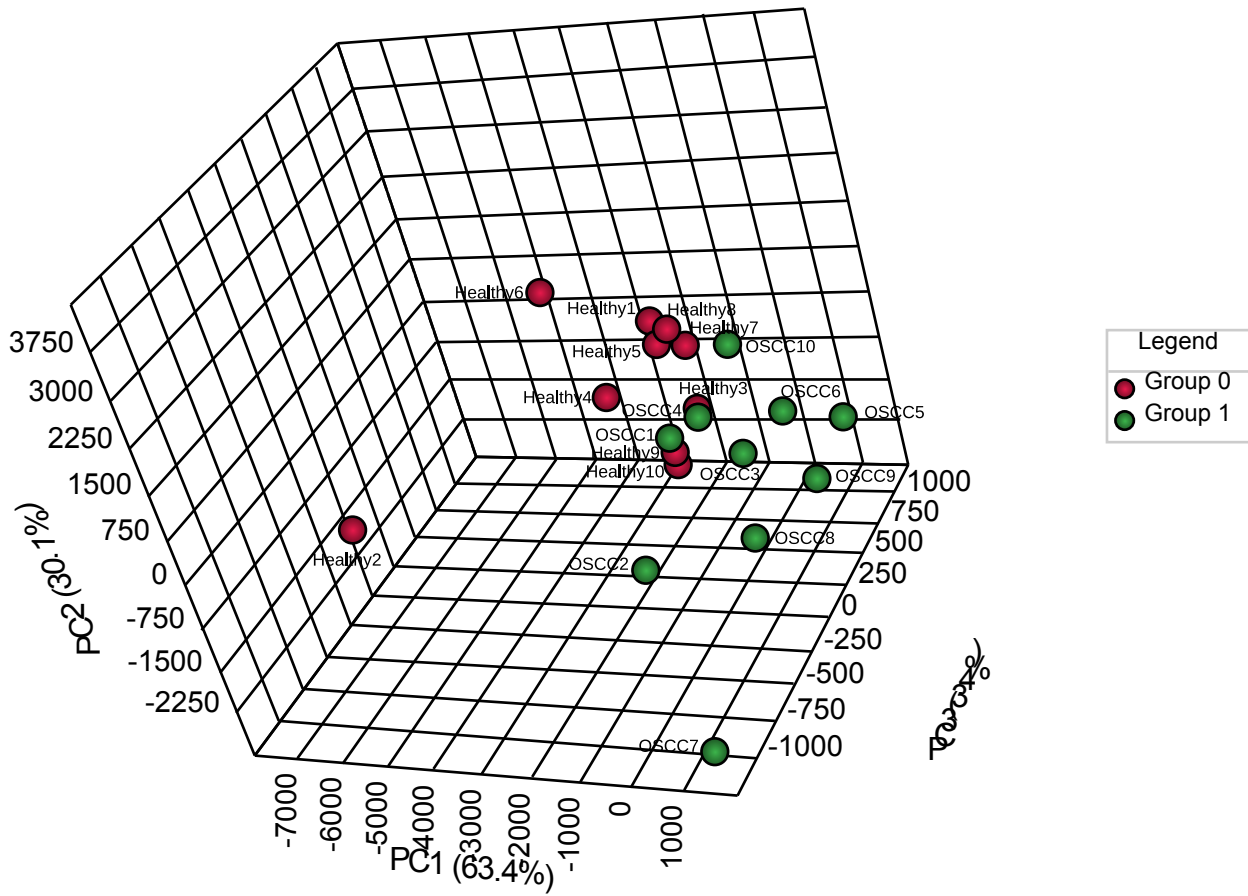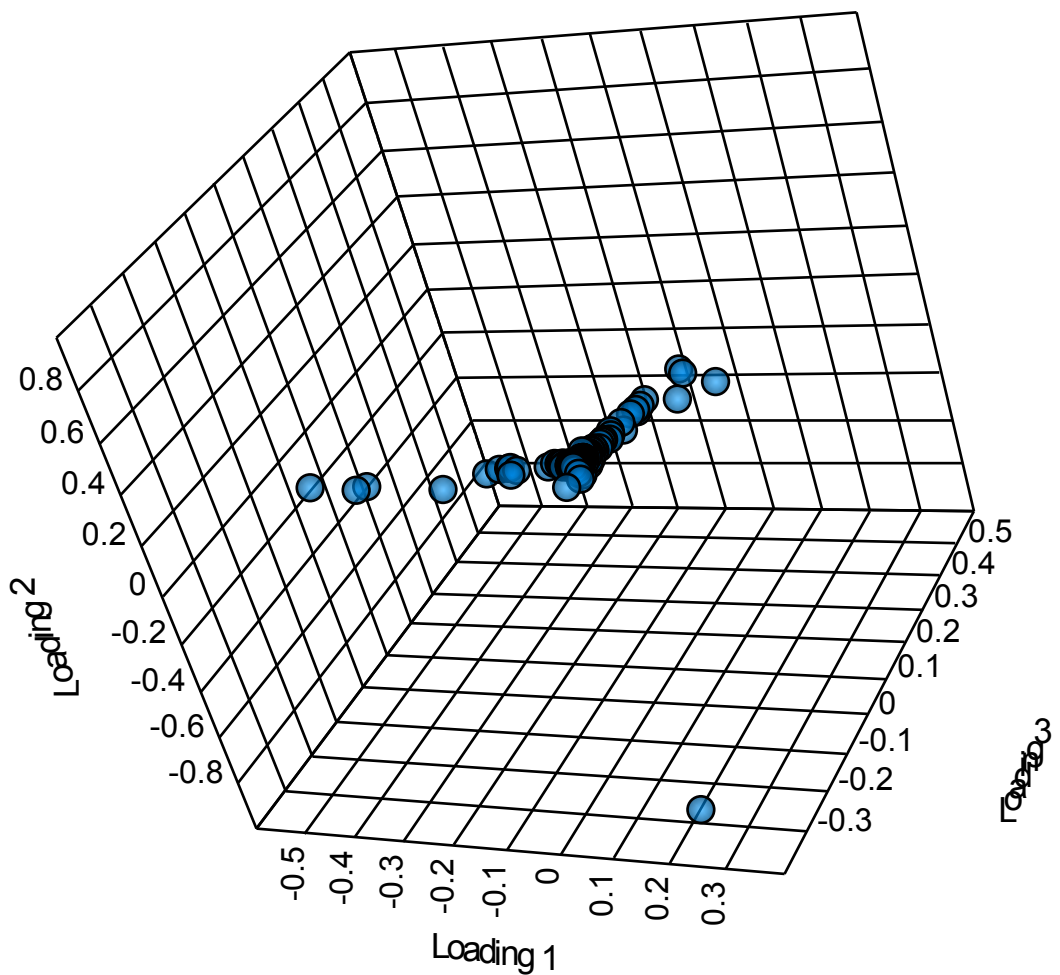

species

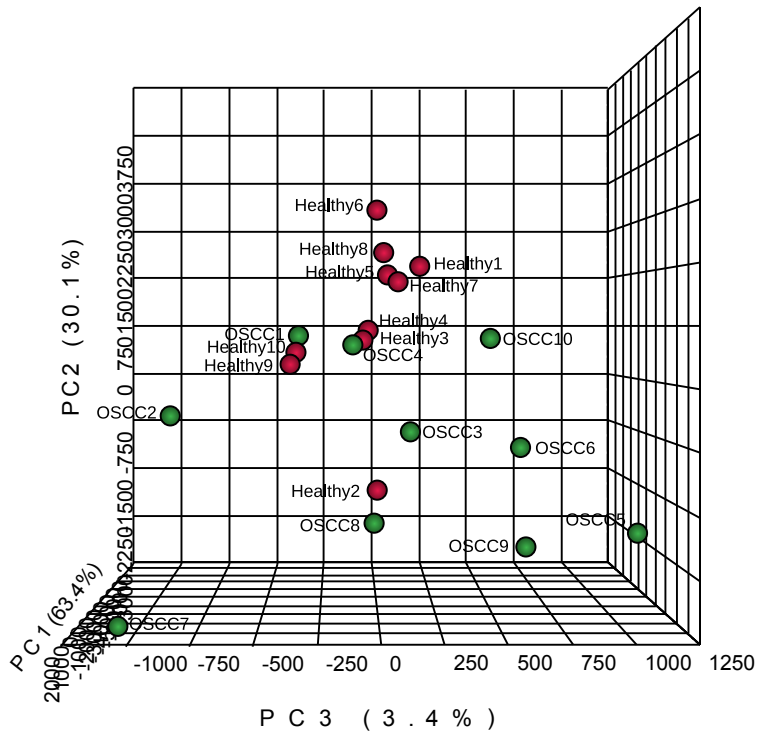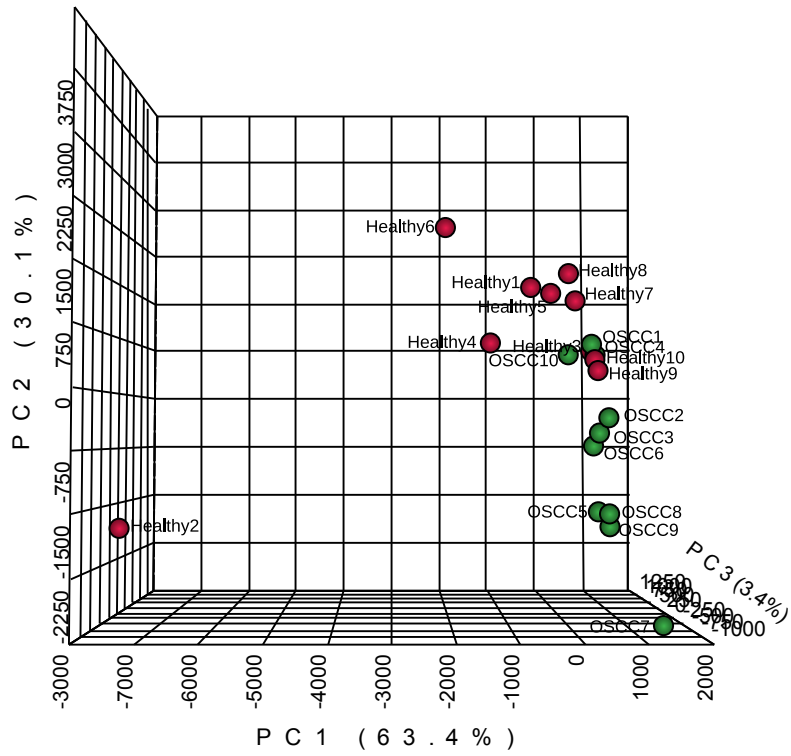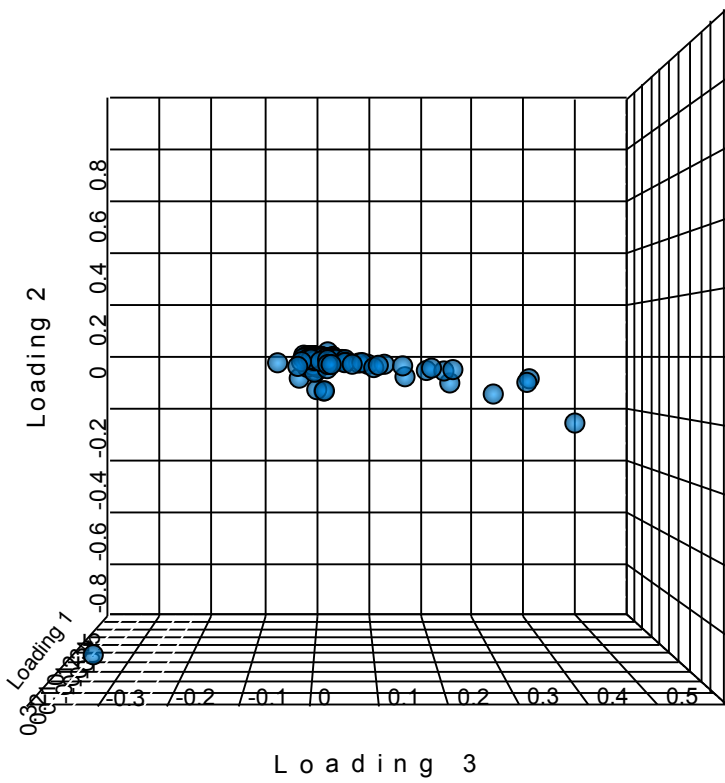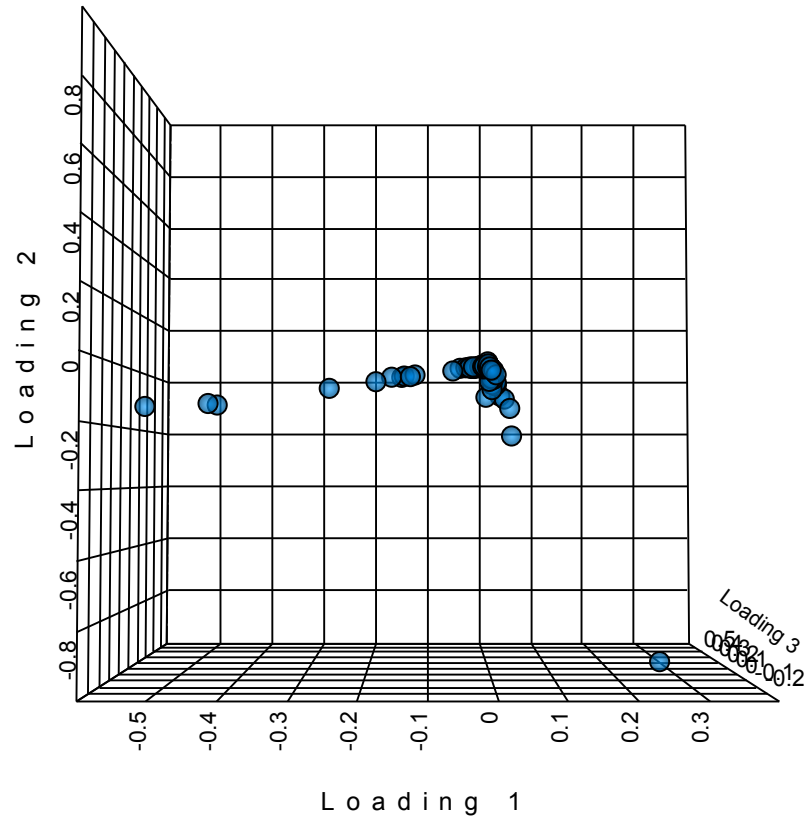

Supplement: mmc12.pdf [file mmc12.pdf]

# classes

## Scores Plot

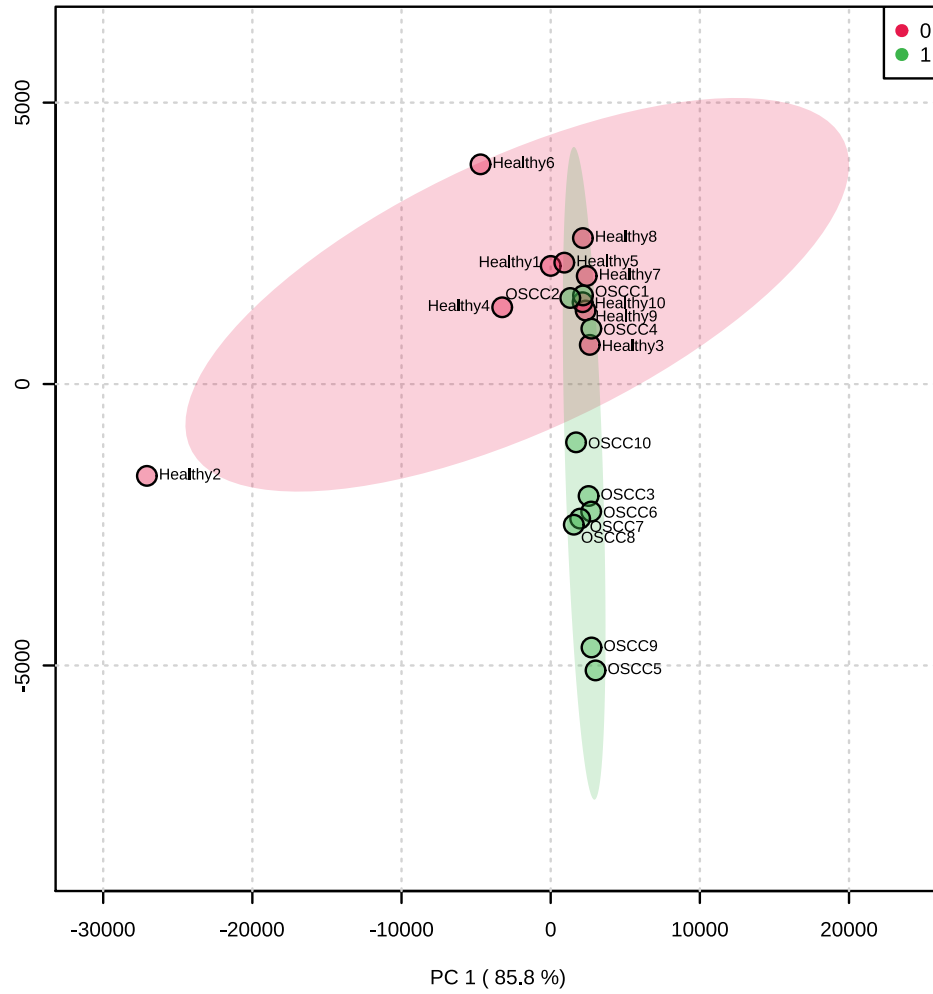

## Scores Plot

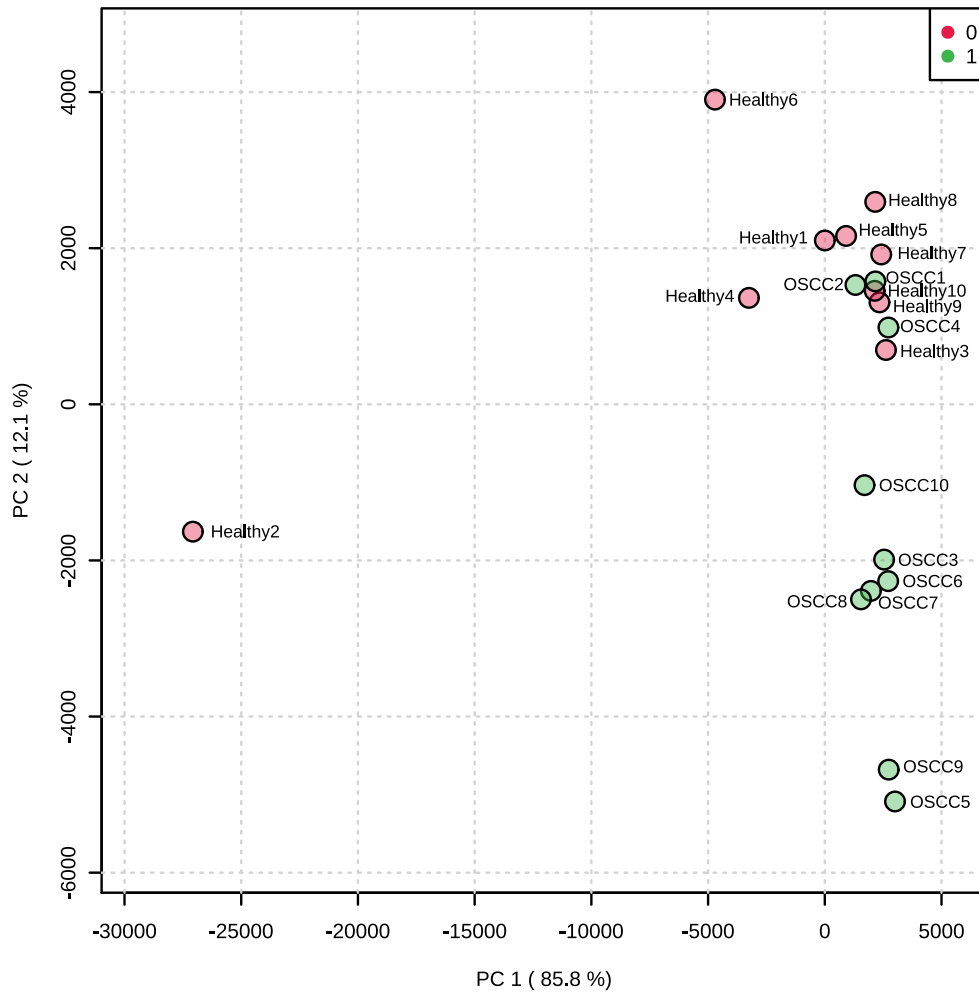

# classes

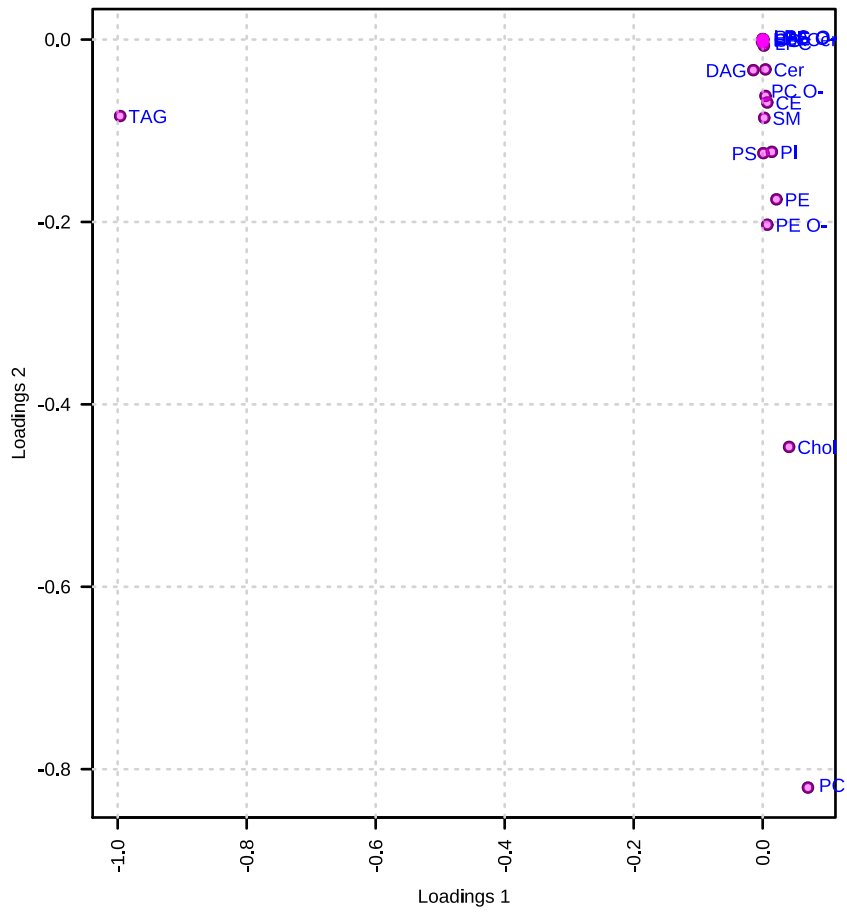

# classes

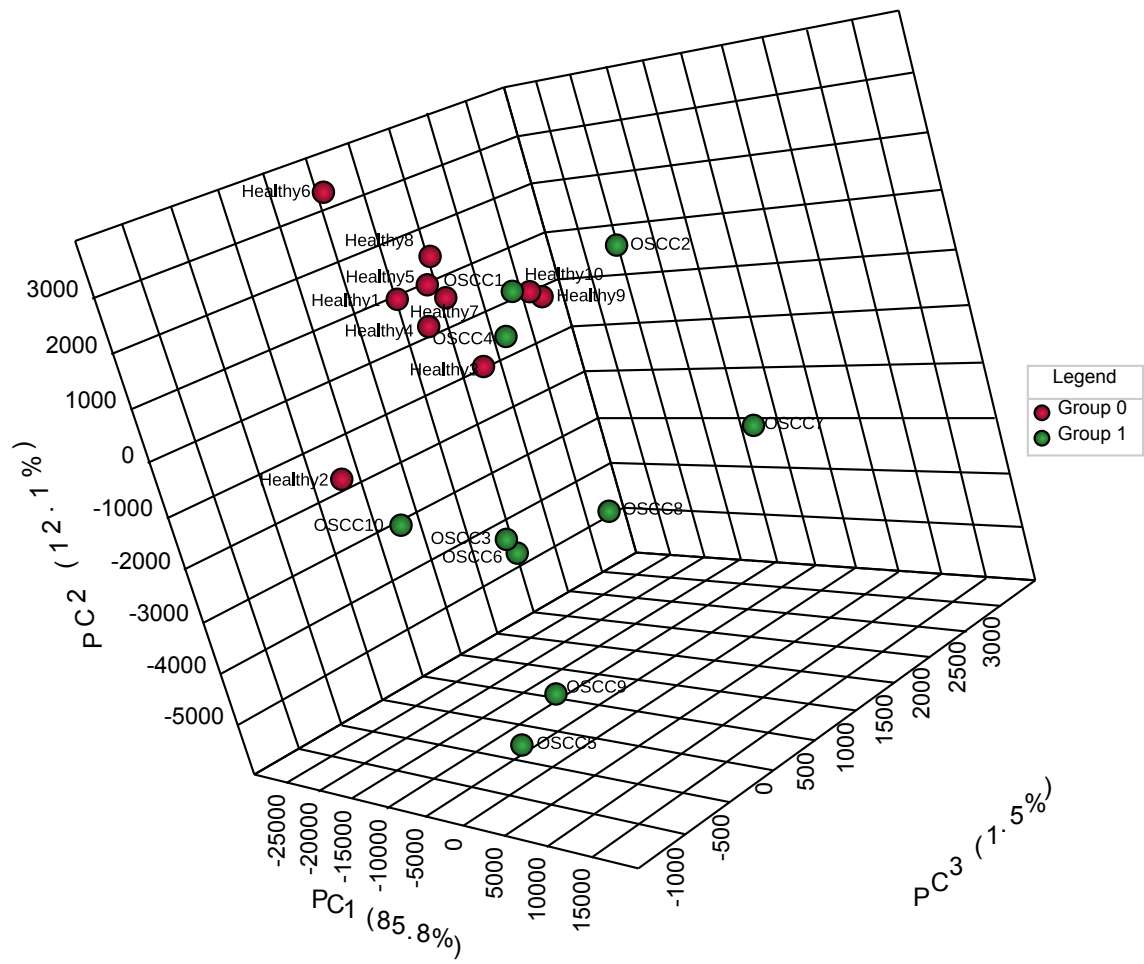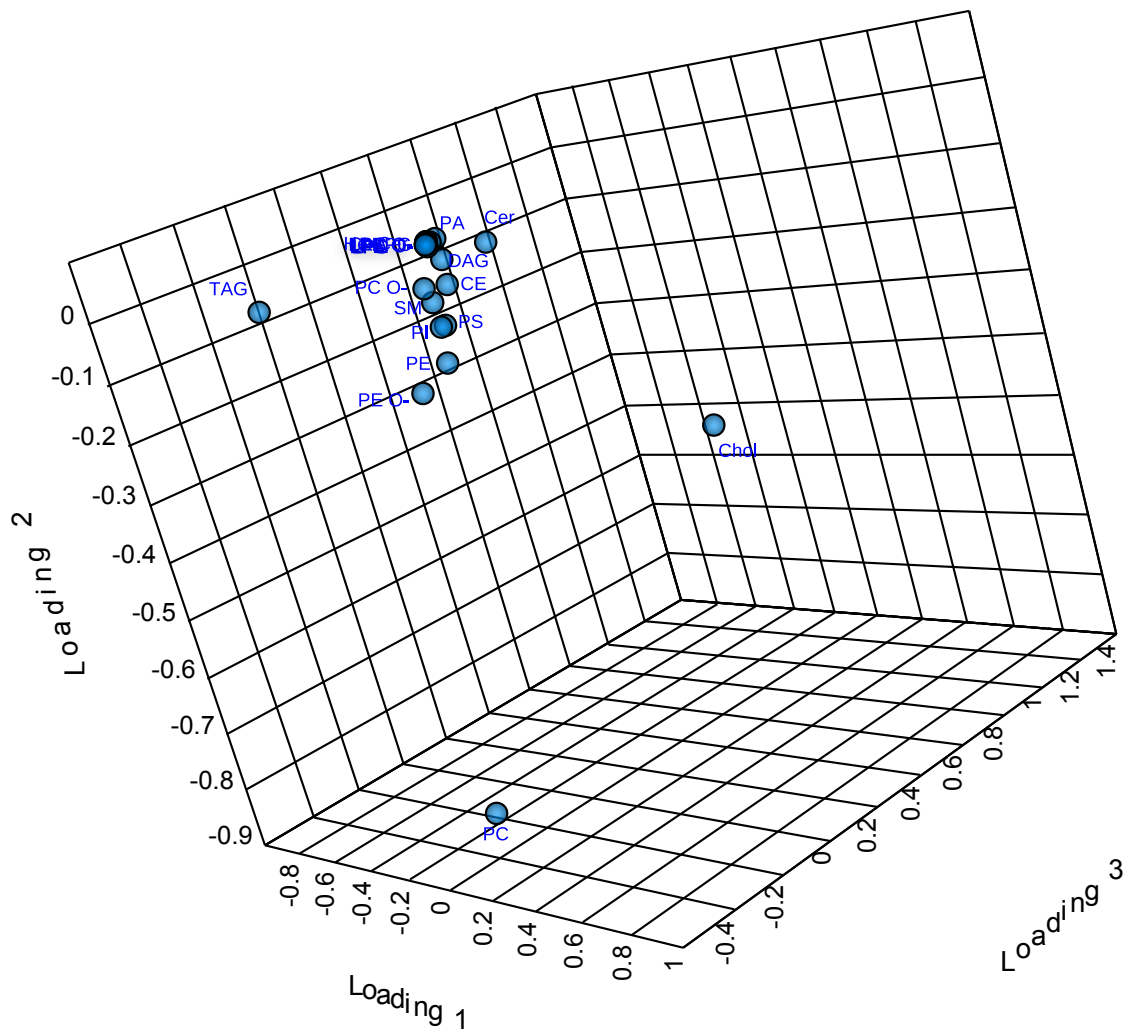

# classes

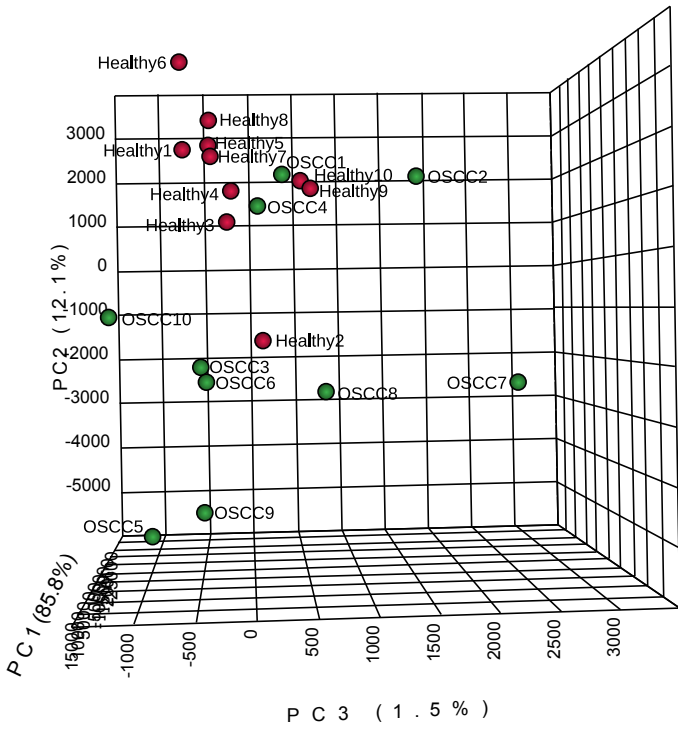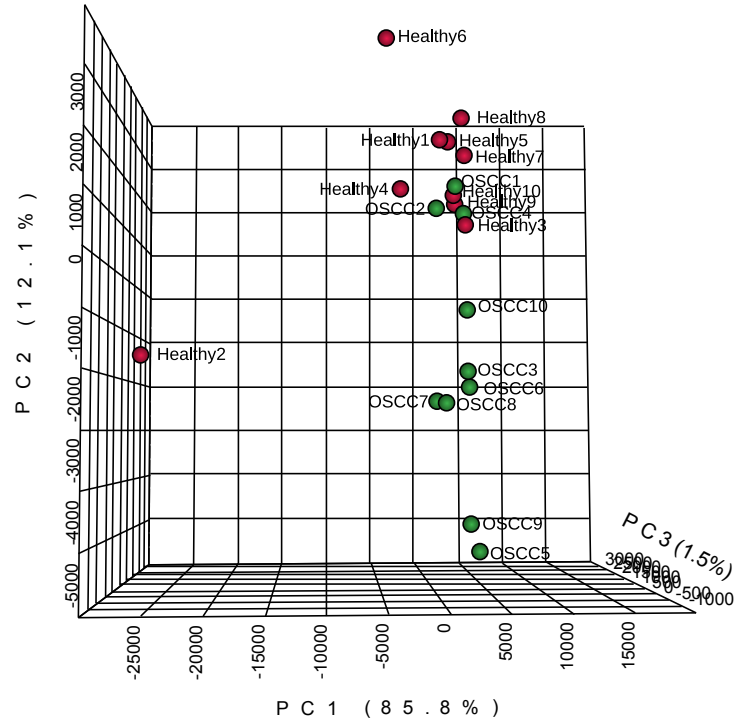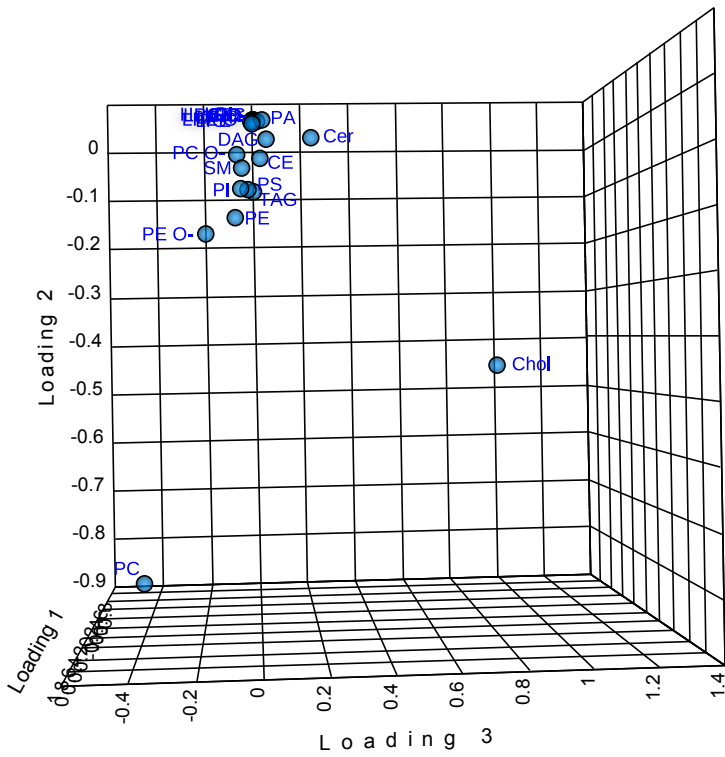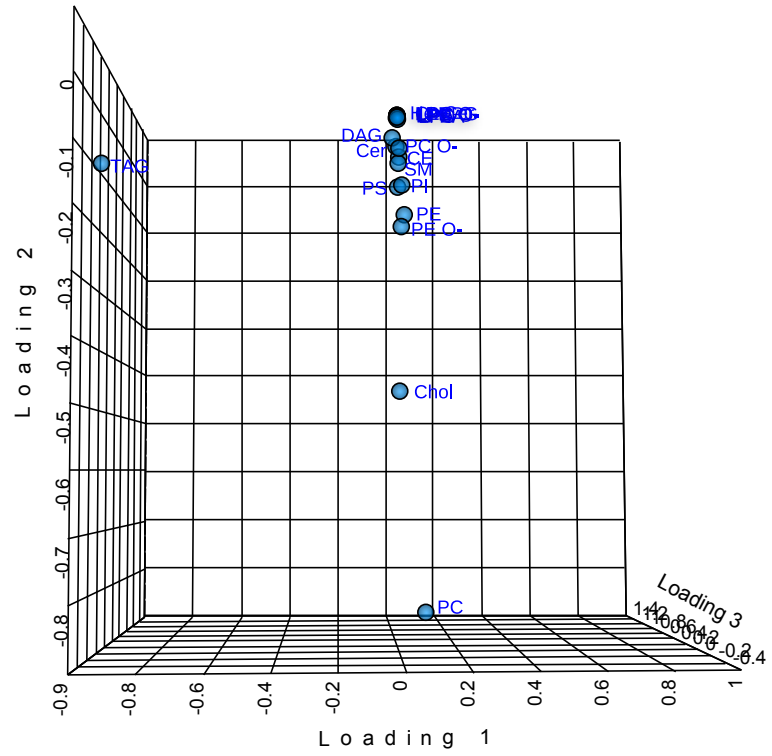

Supplement: mmc13.pdf [file mmc13.pdf]

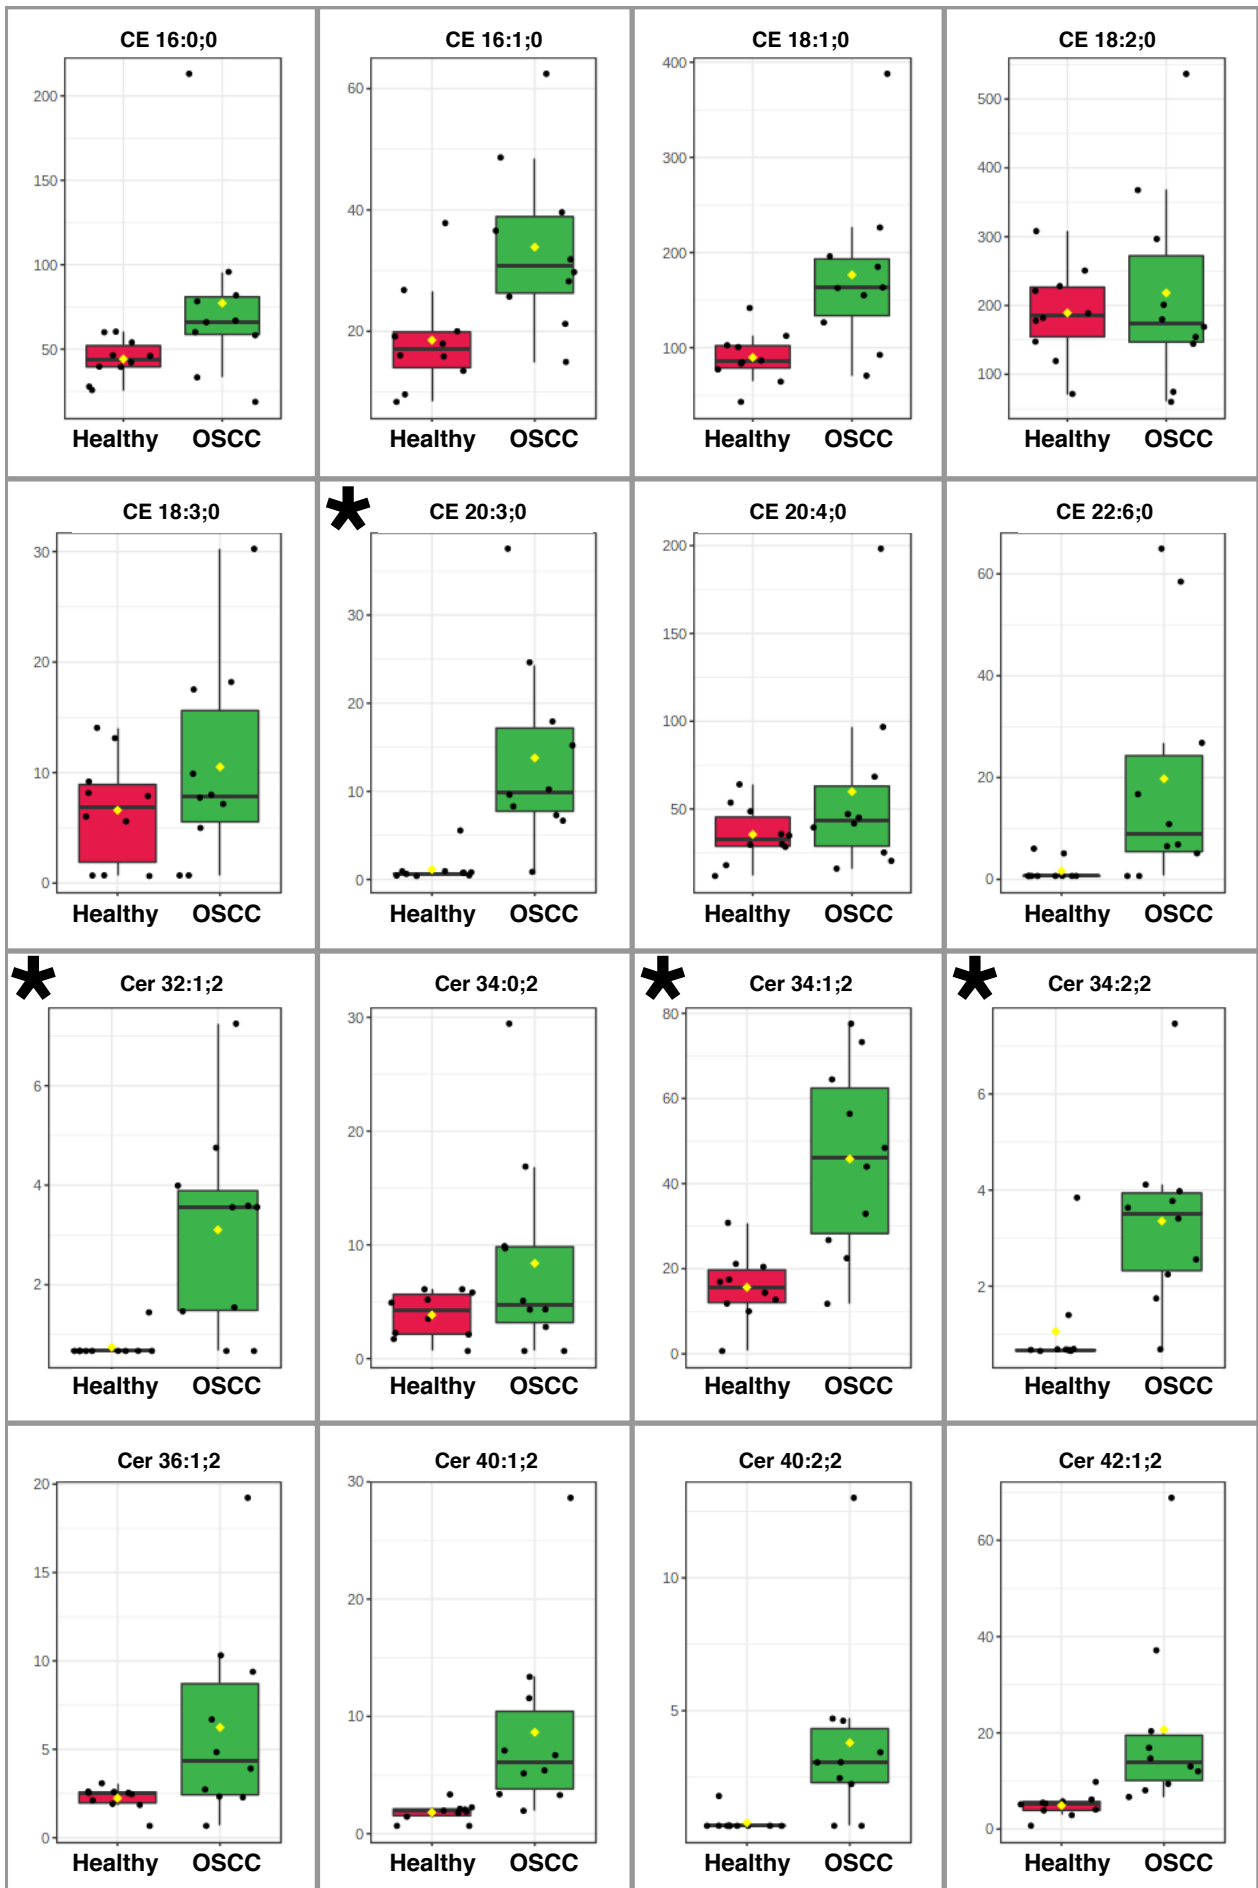

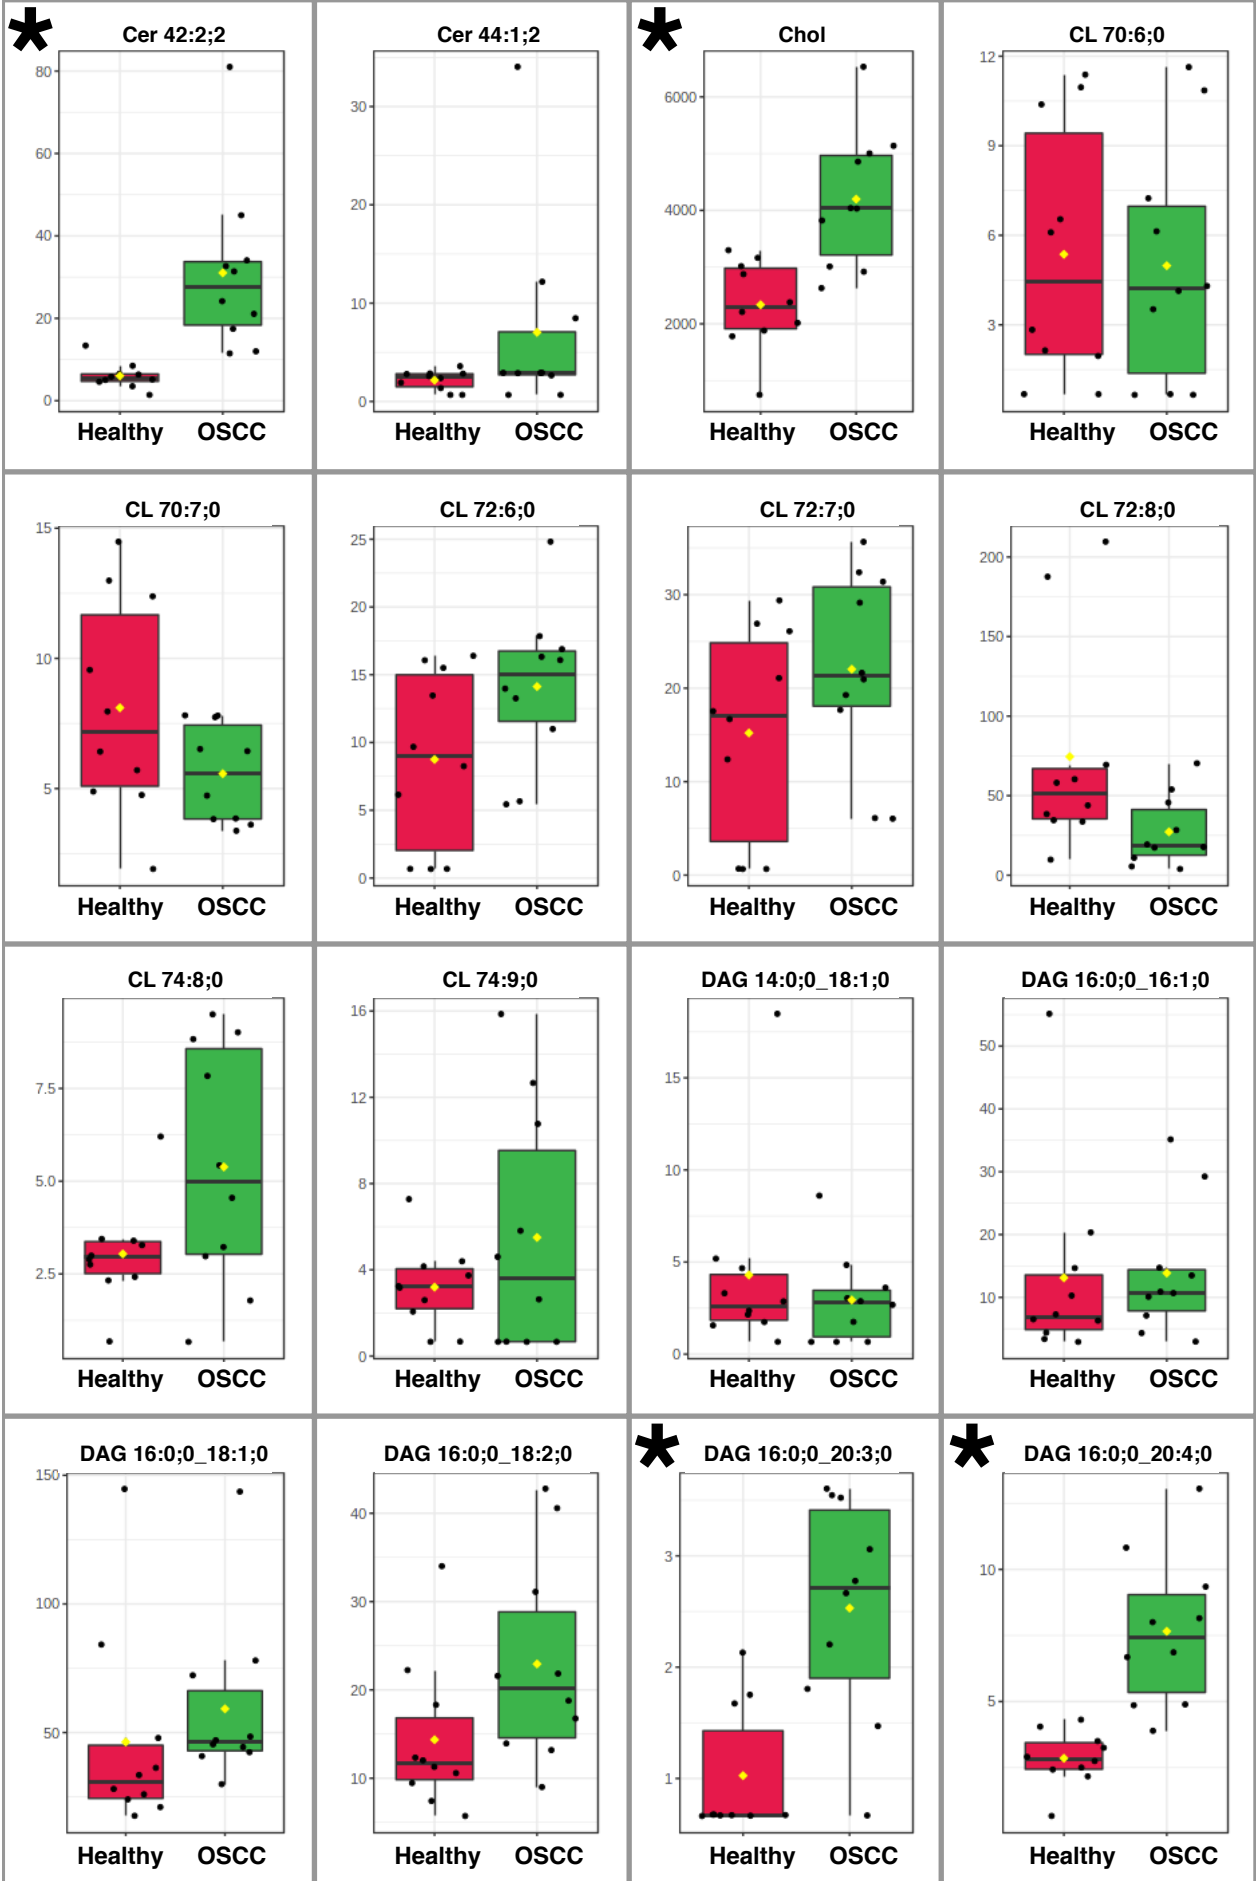

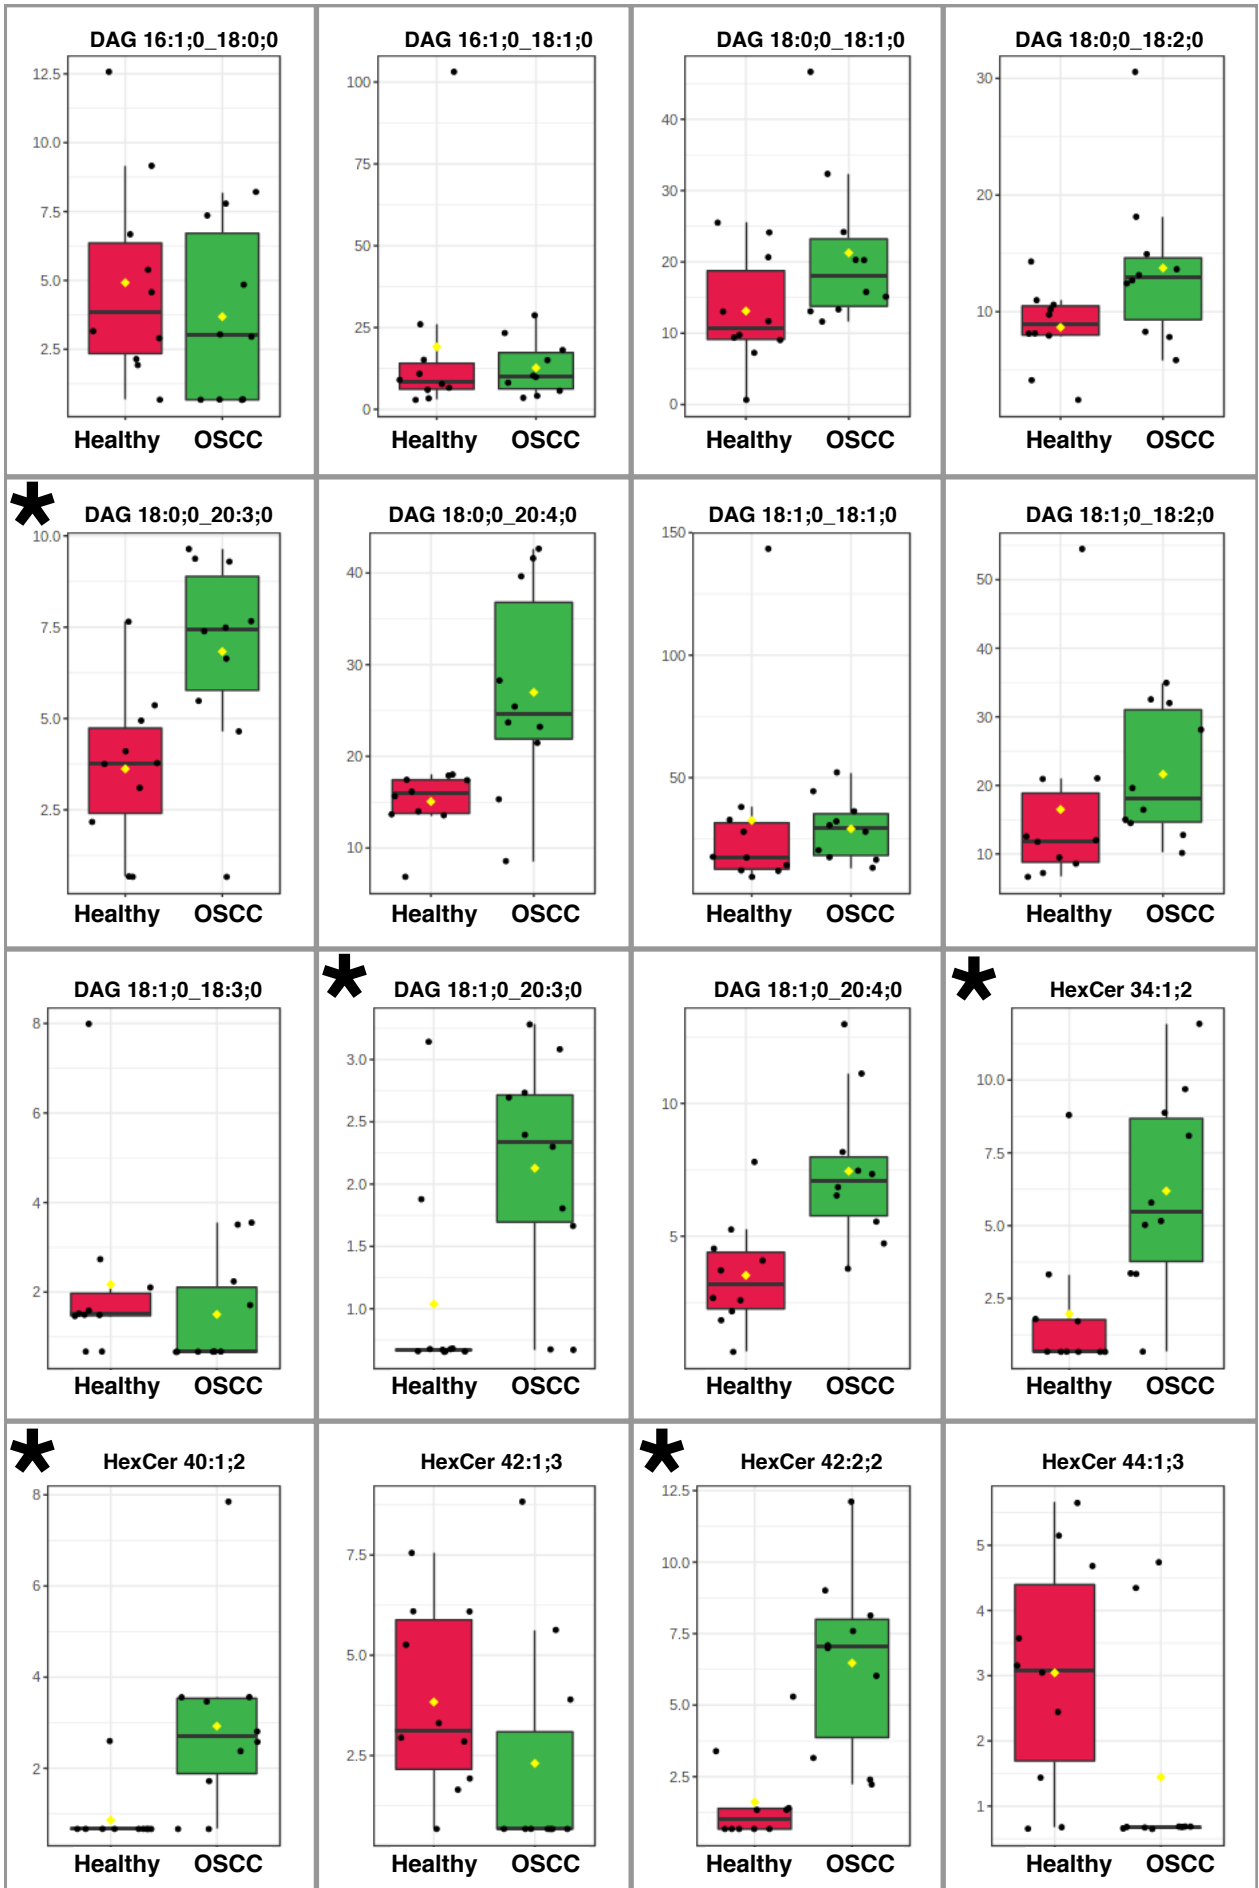

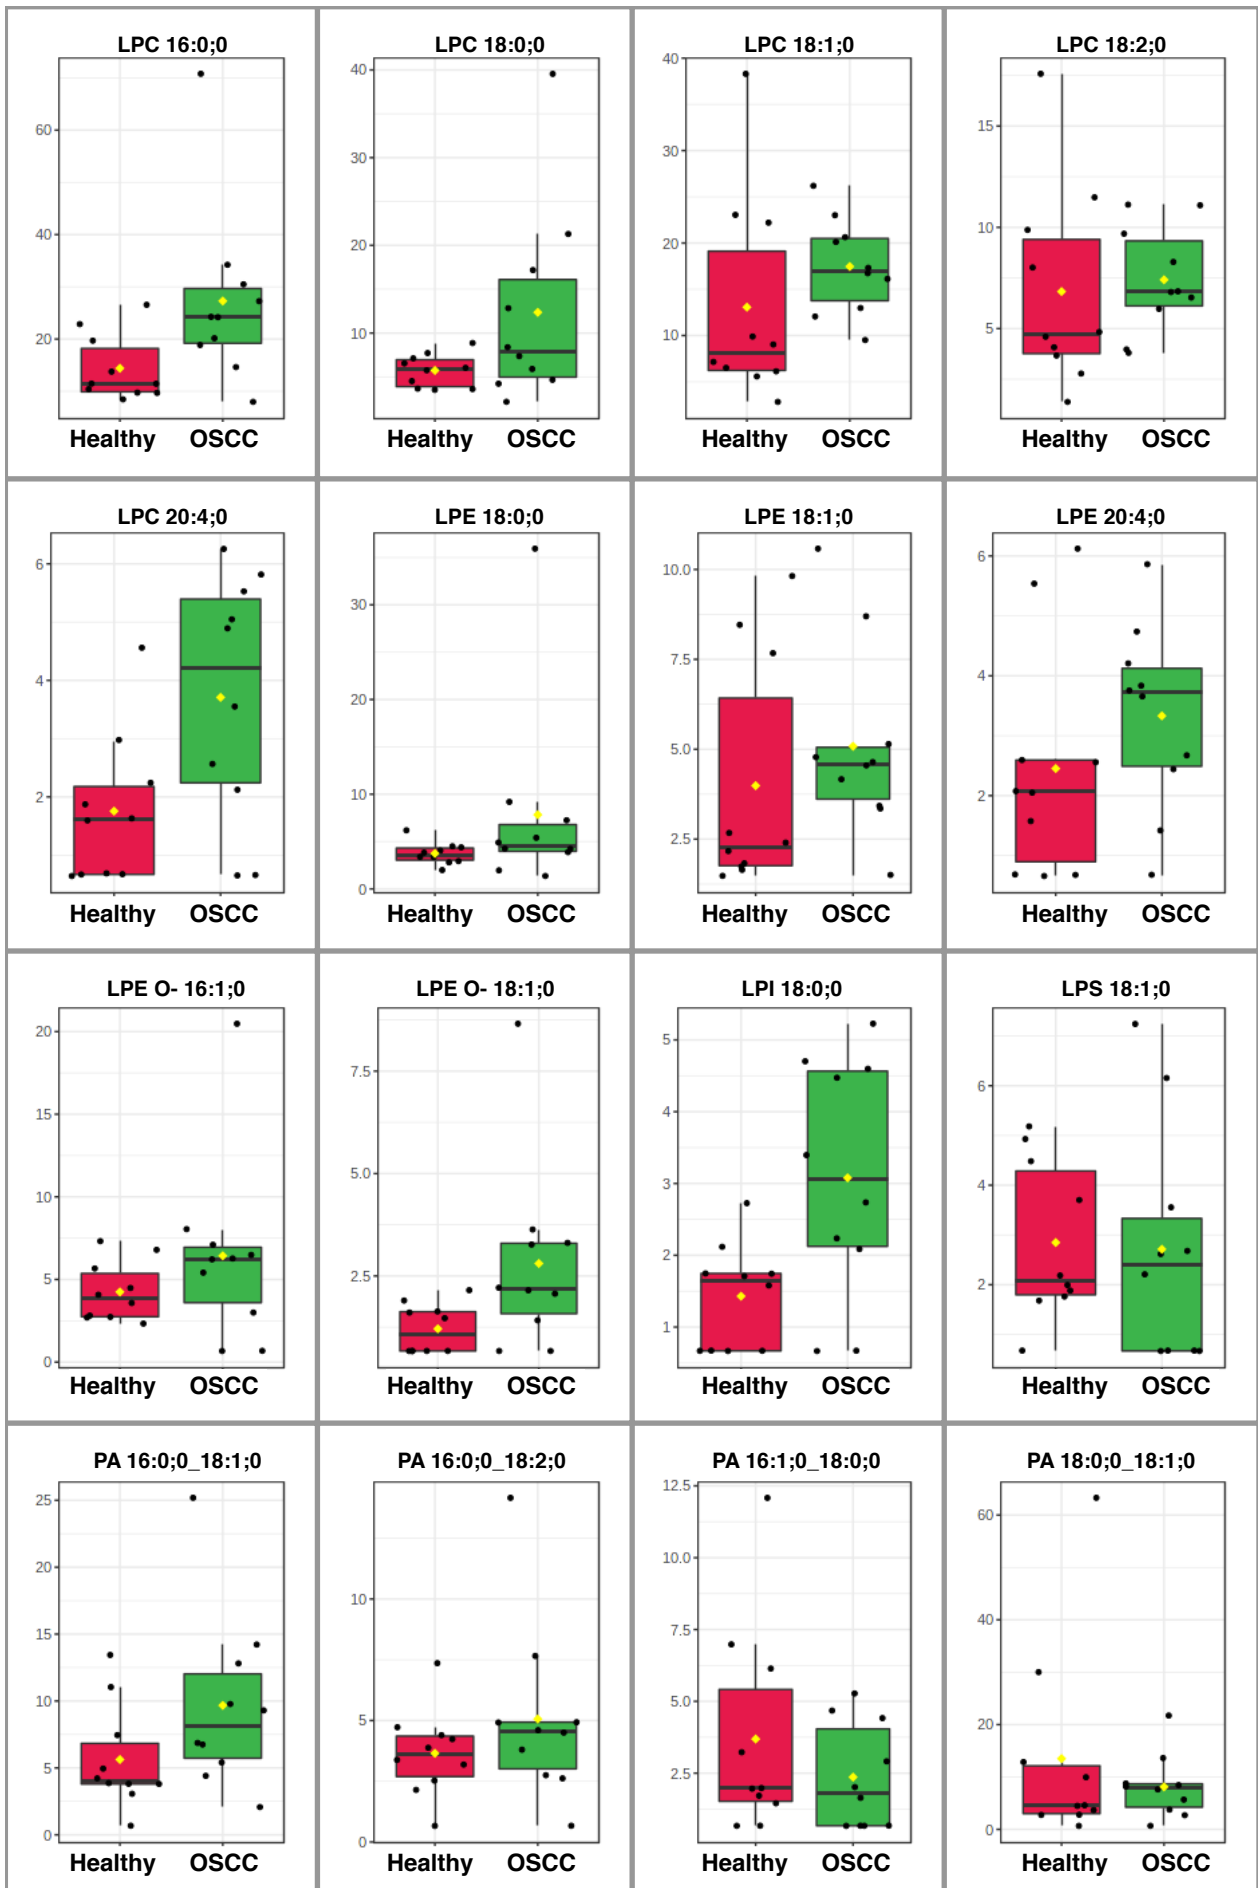

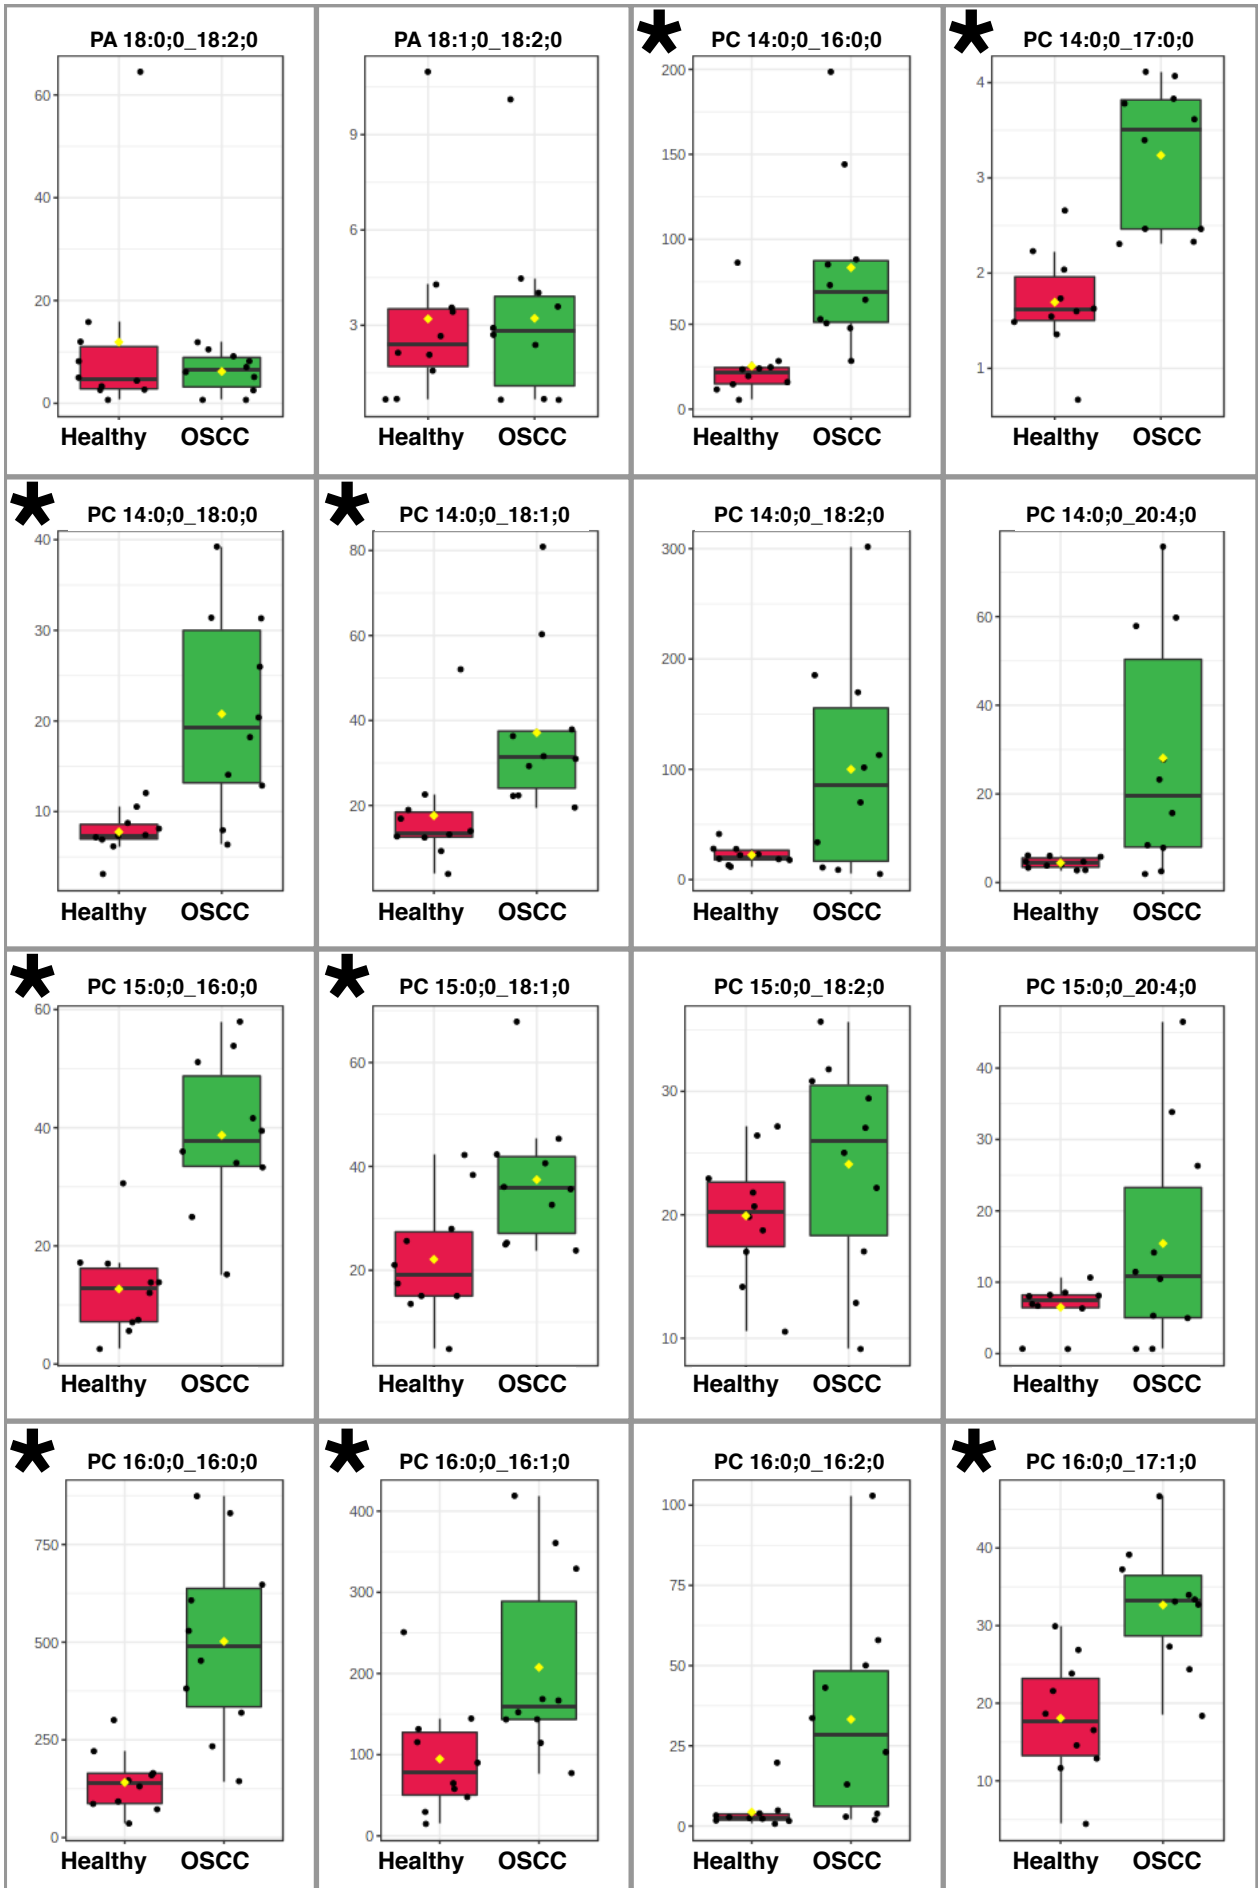

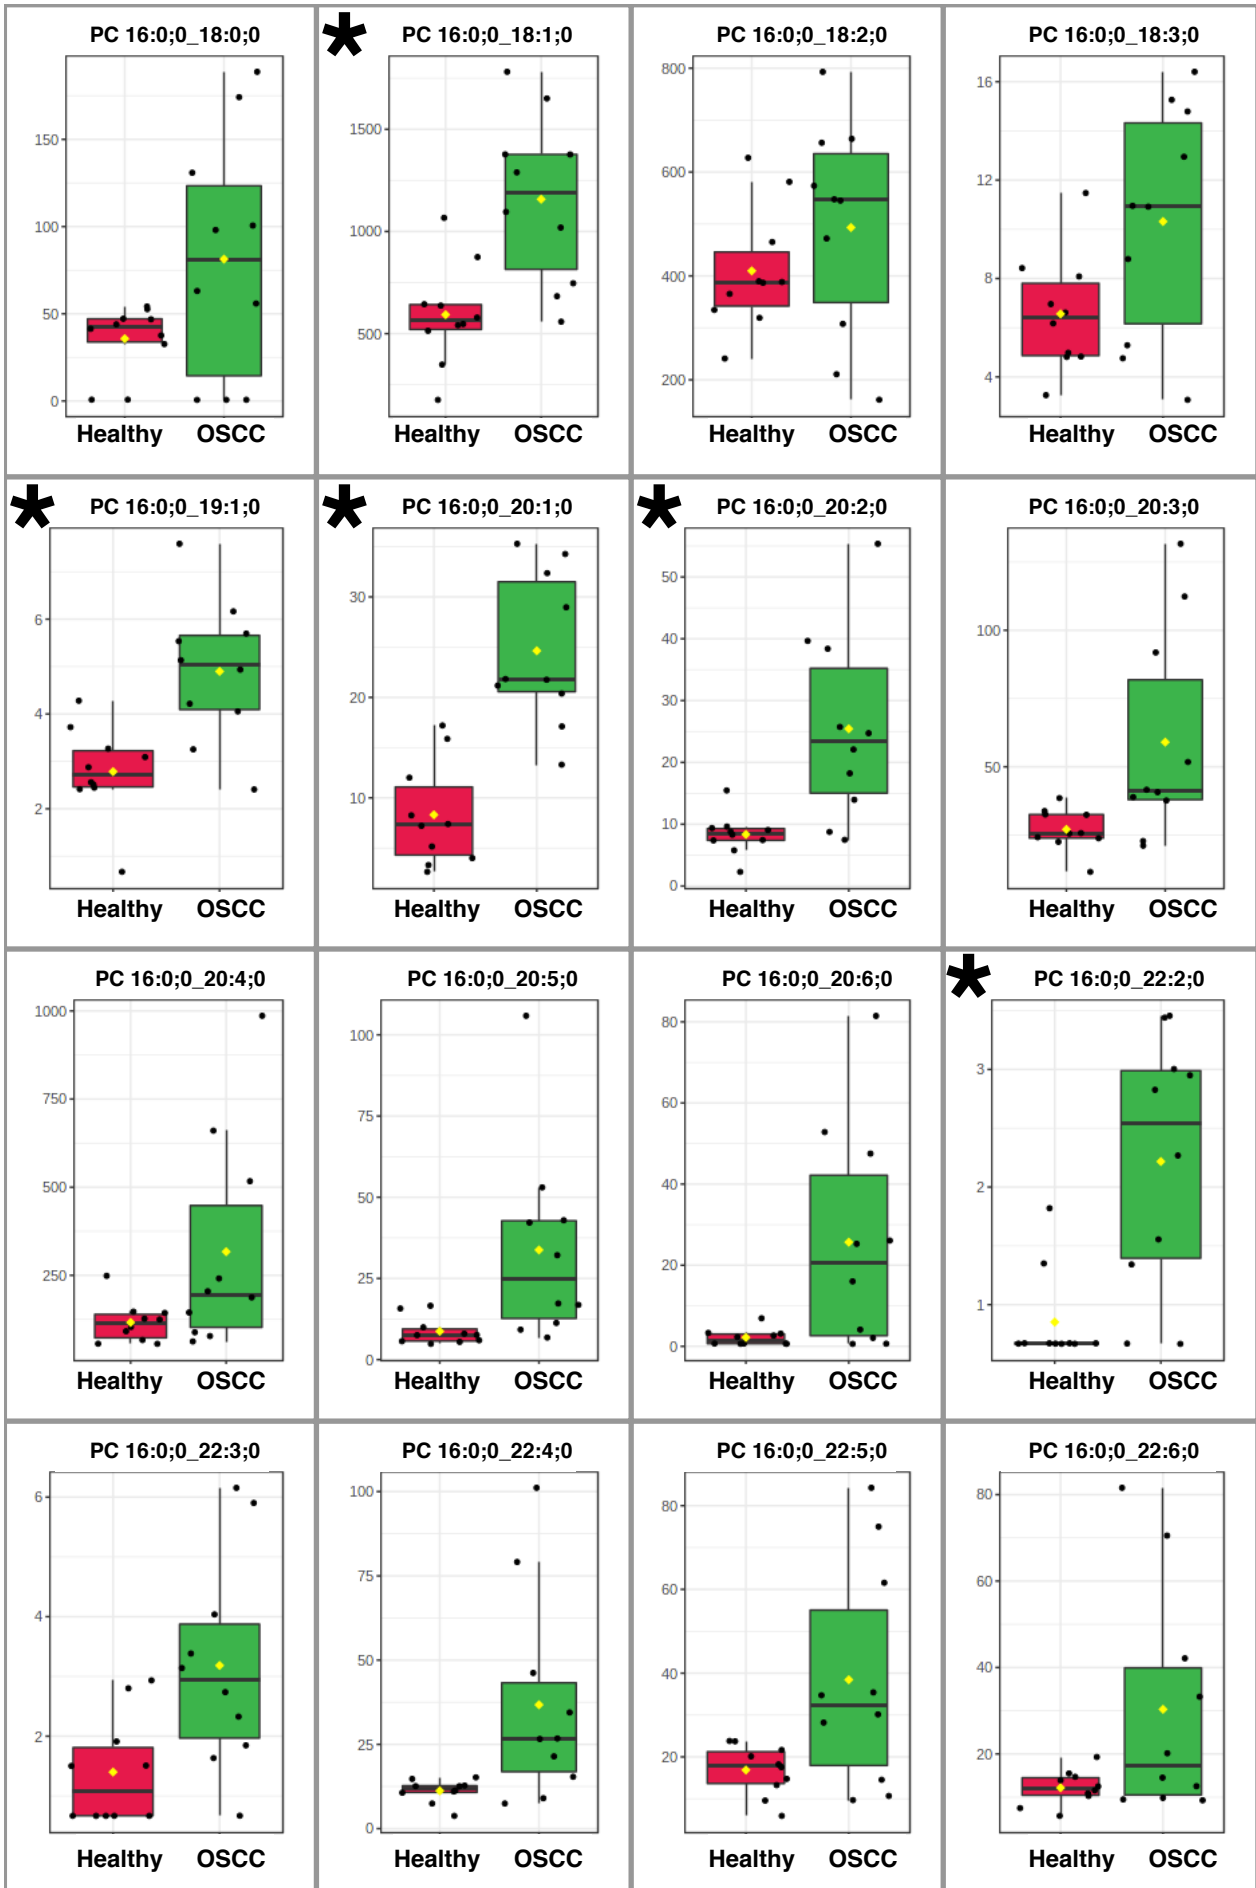

\*

PC 16:1;0\_16:1;0

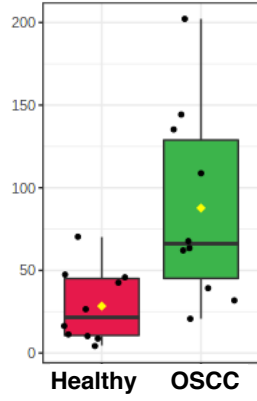

PC 16:1;0\_17:0;0

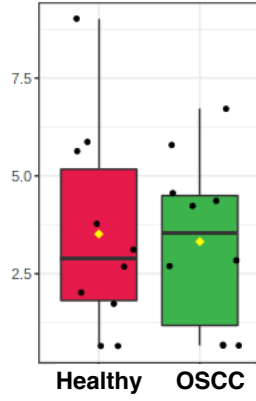

PC 16:1;0\_17:1;0

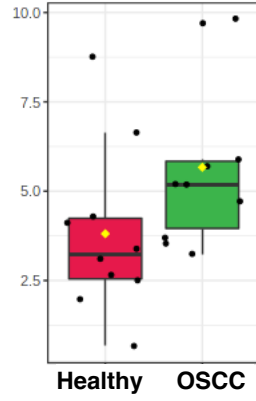

PC 16:1;0\_18:0;0

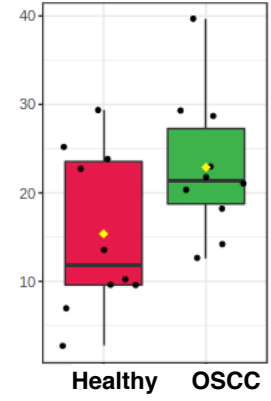

PC 16:1;0\_18:1;0

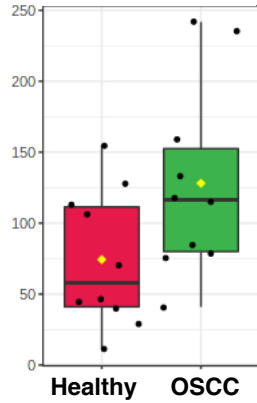

PC 16:1;0\_18:2;0

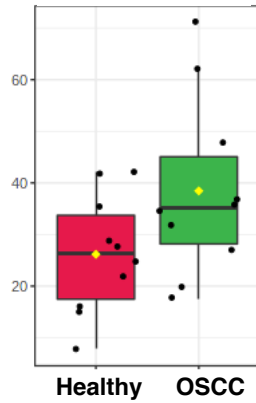

\*

PC 16:1;0\_20:3;0

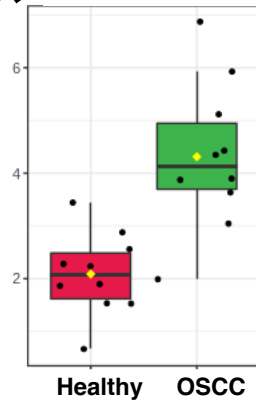

PC 16:1;0\_20:4;0

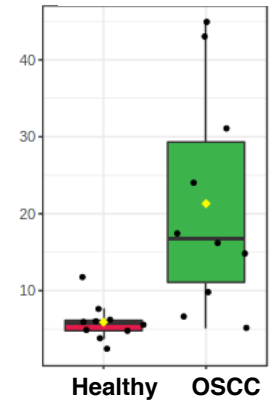

PC 17:0;0\_18:1;0

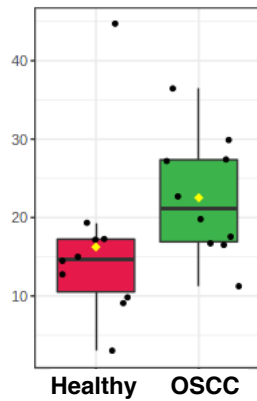

PC 17:0;0\_18:2;0

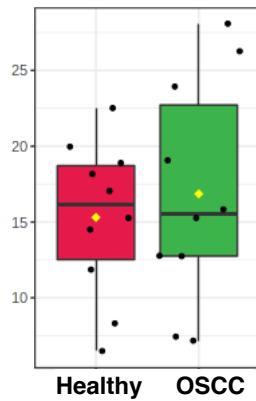

PC 17:0;0\_20:4;0

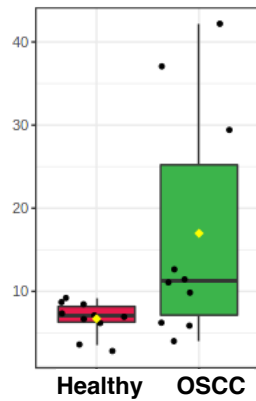

PC 17:1;0\_18:0;0

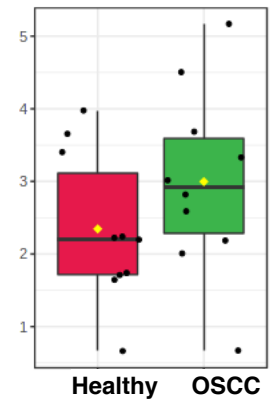

PC 17:1;0\_18:1;0

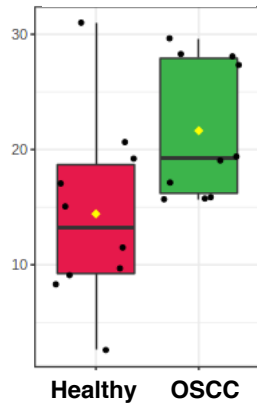

PC 17:1;0\_18:2;0

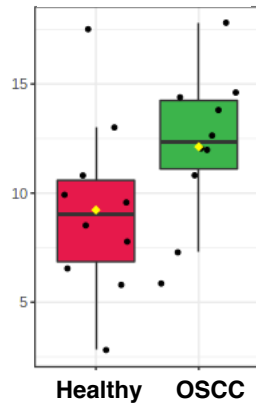

PC 18:0;0\_18:1;0

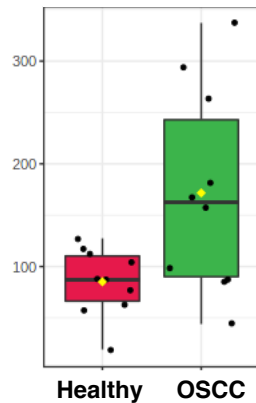

PC 18:0;0\_18:2;0

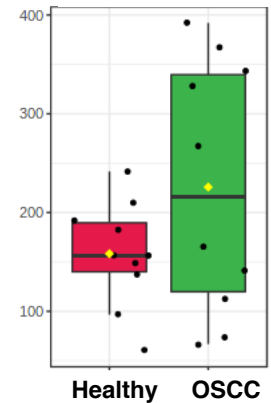

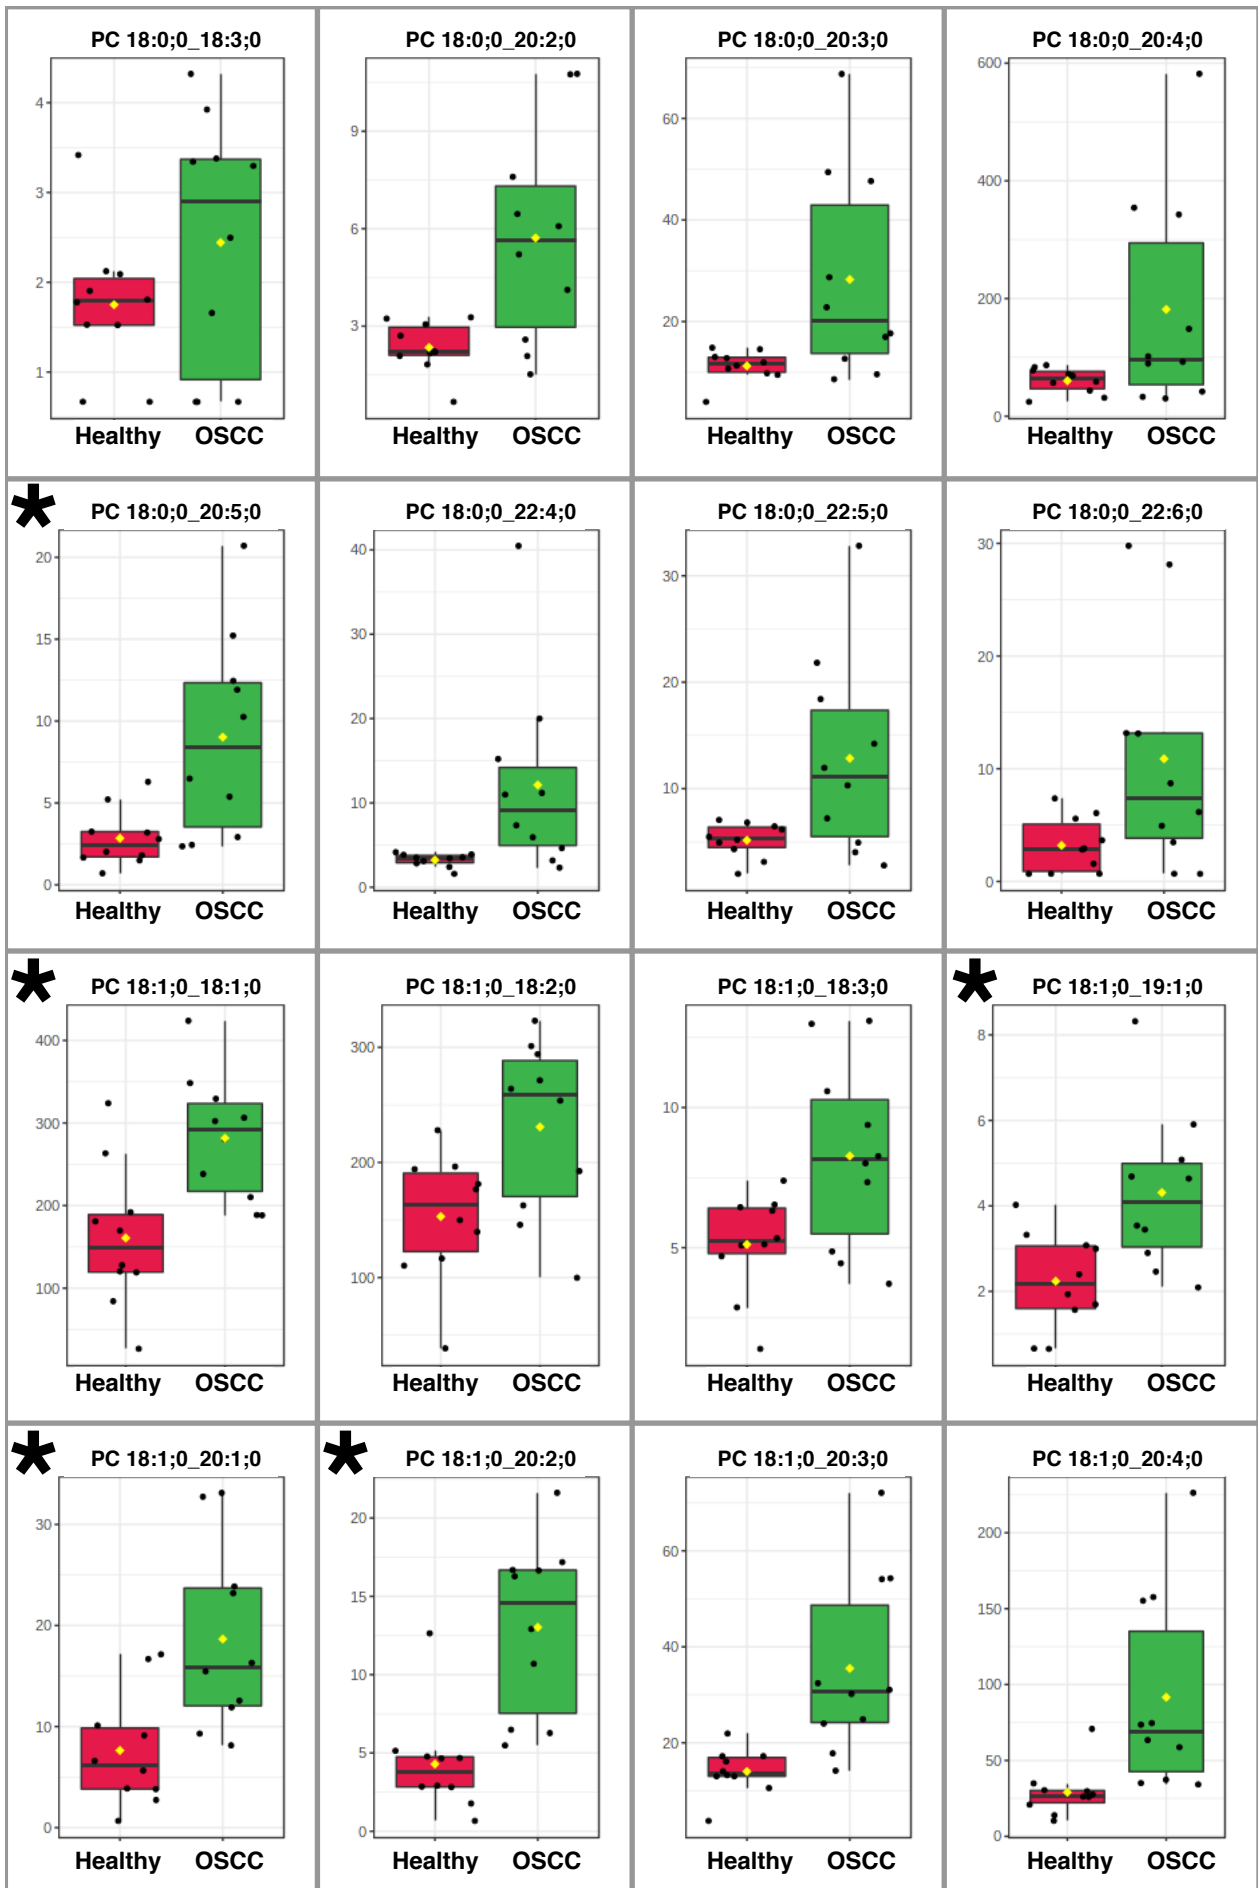



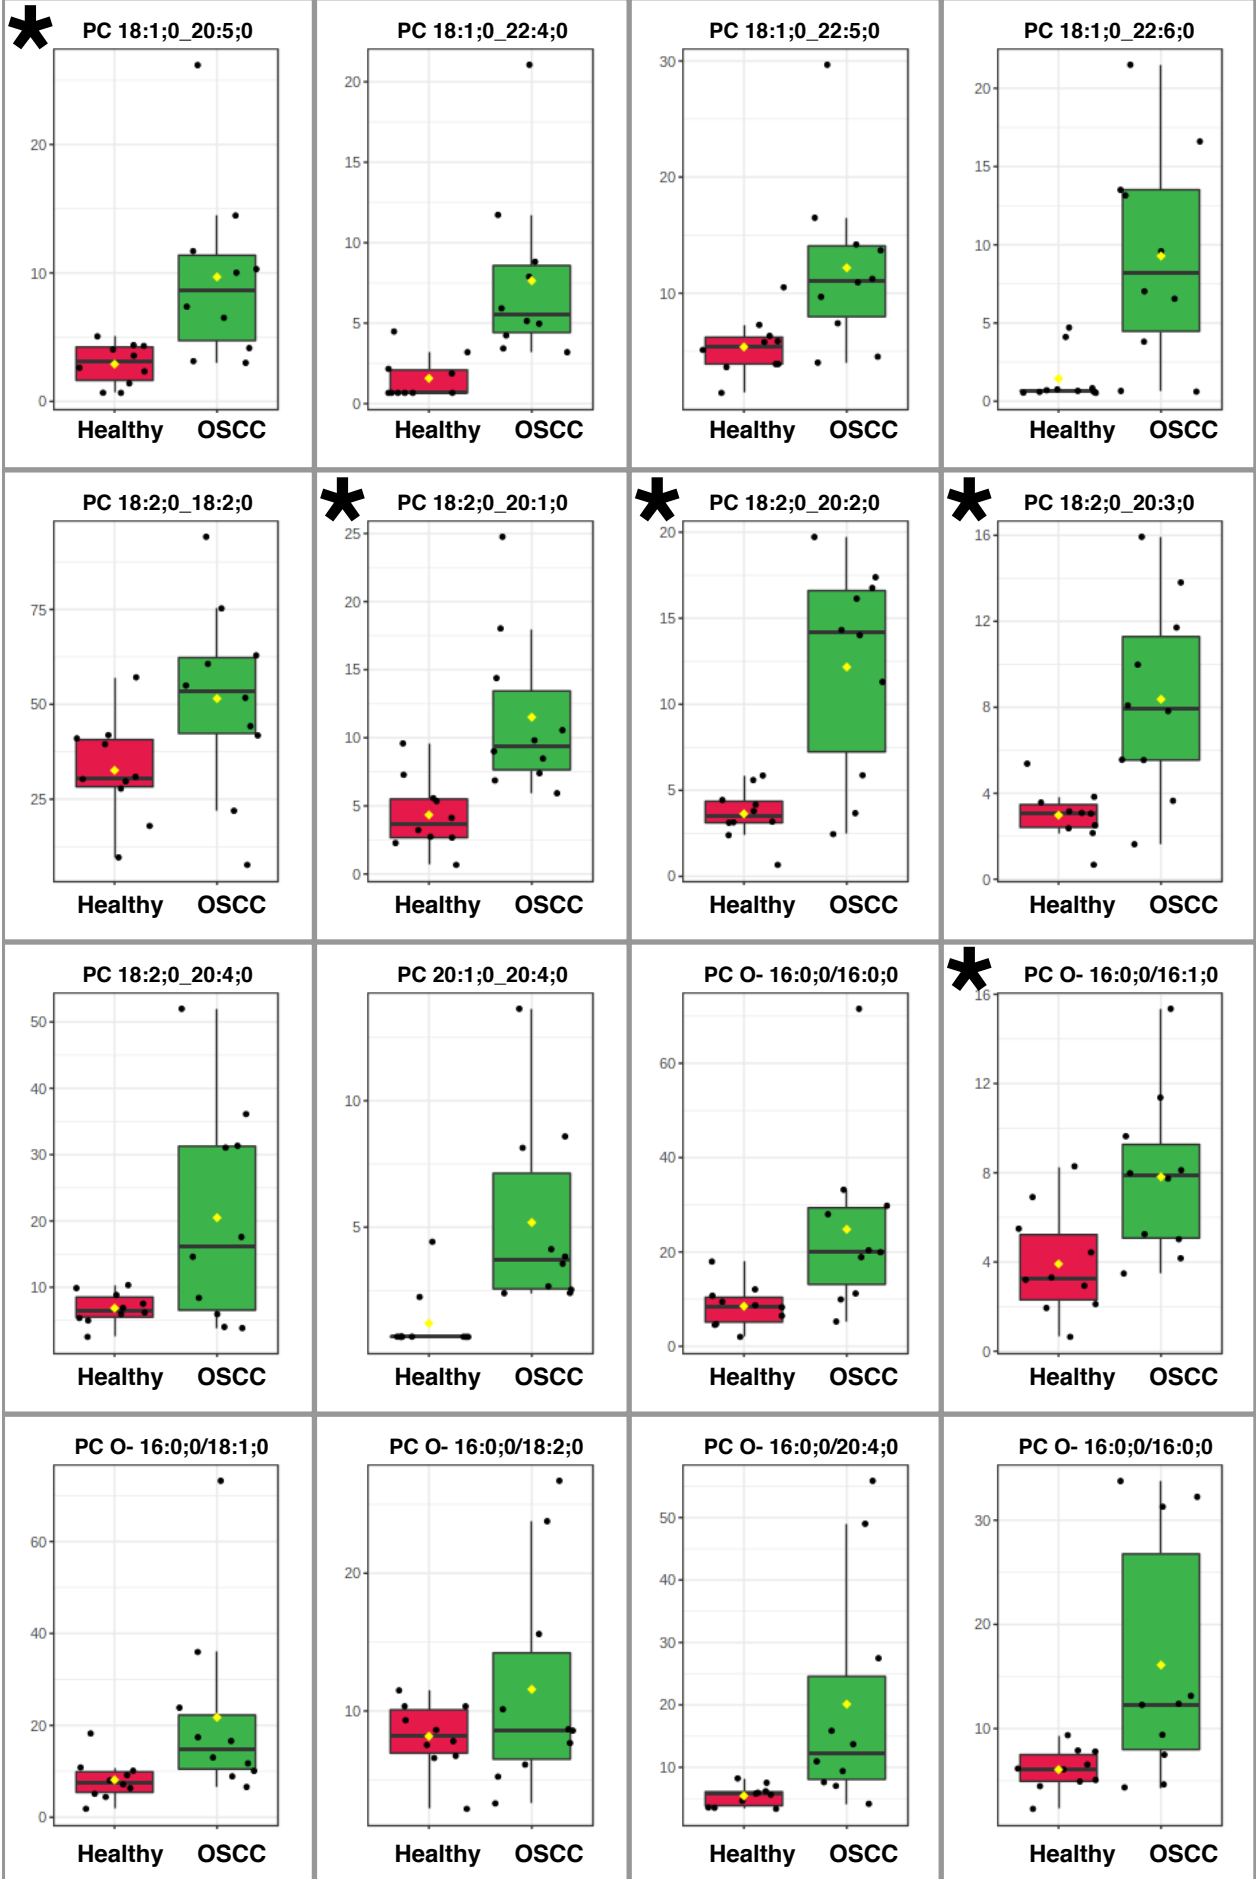

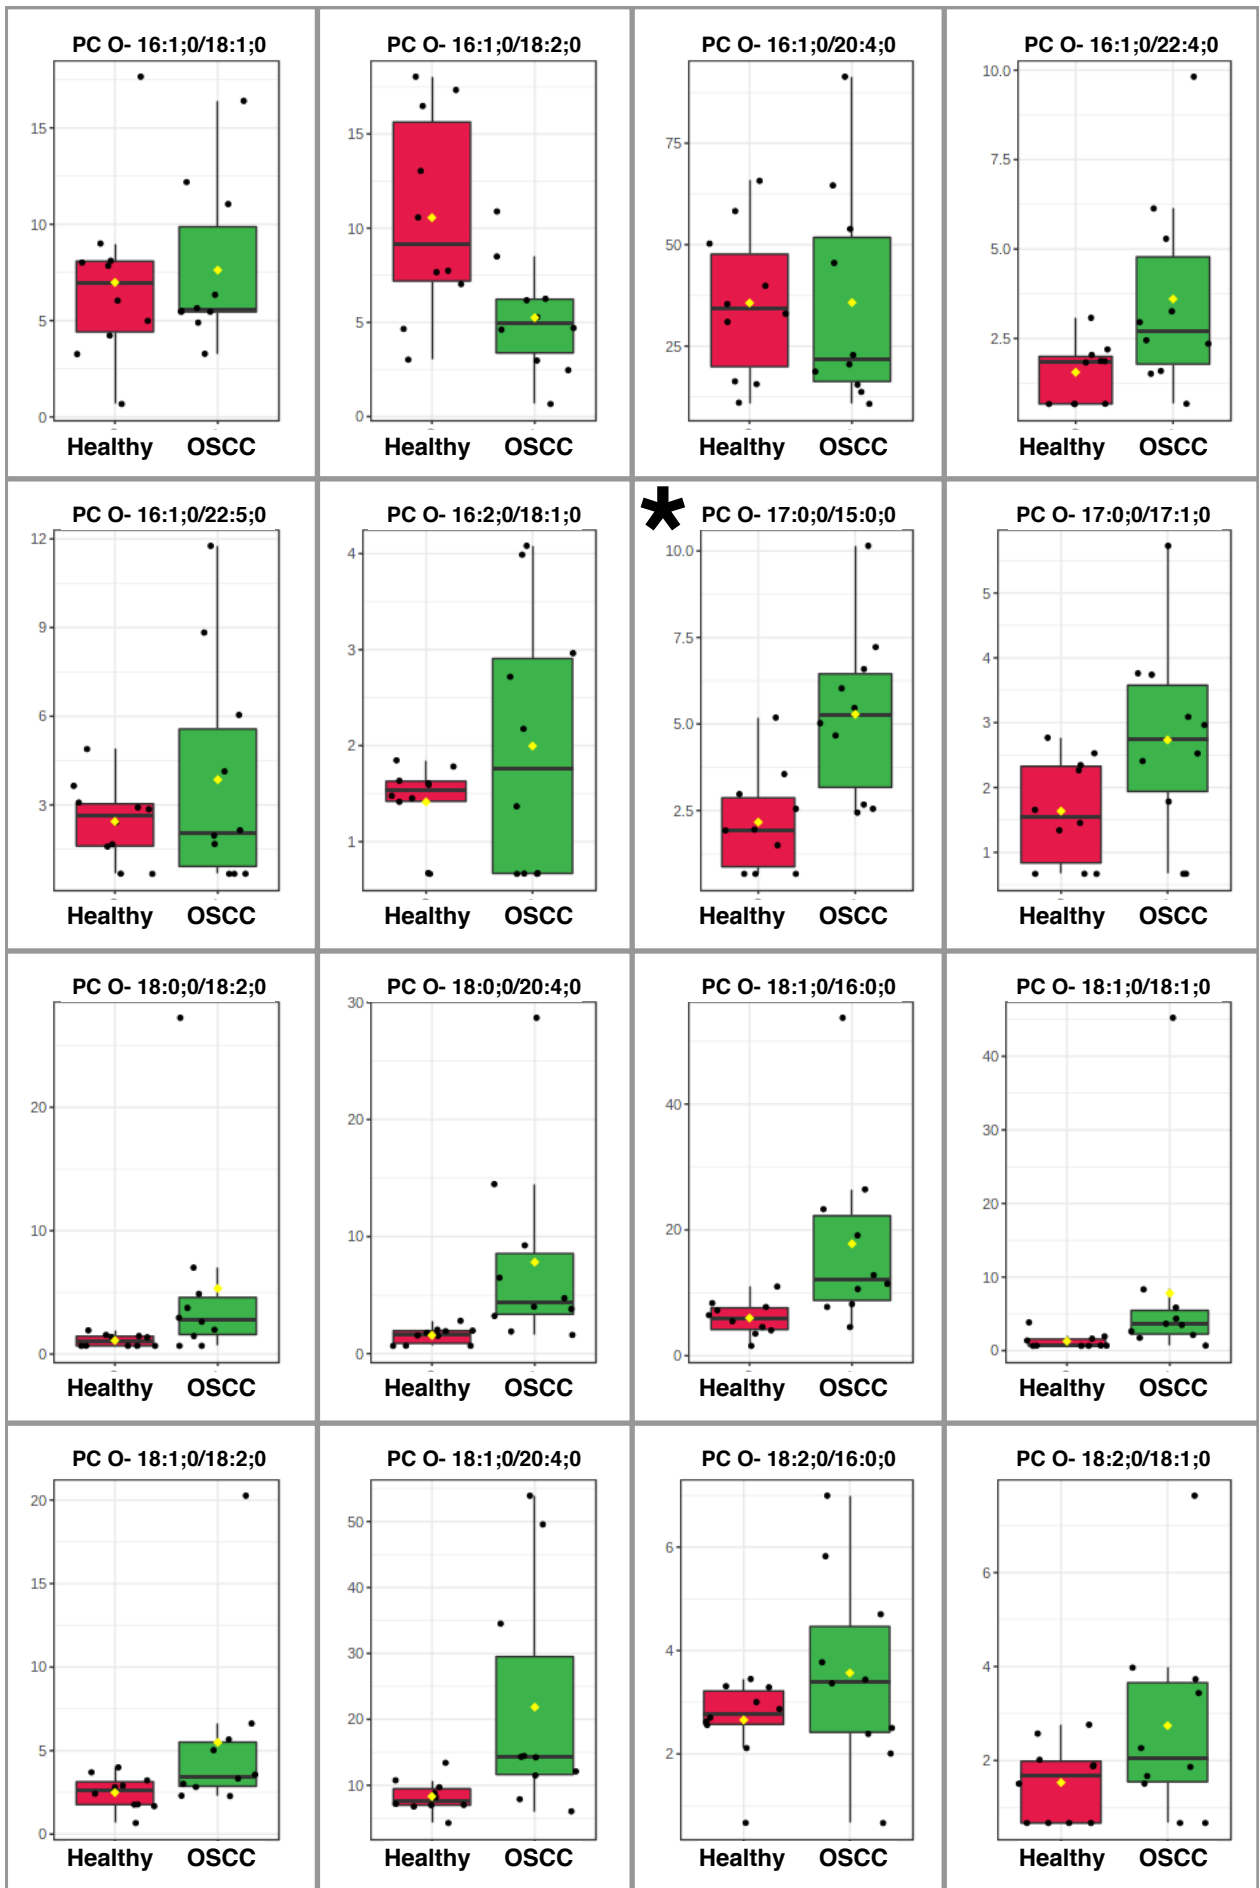

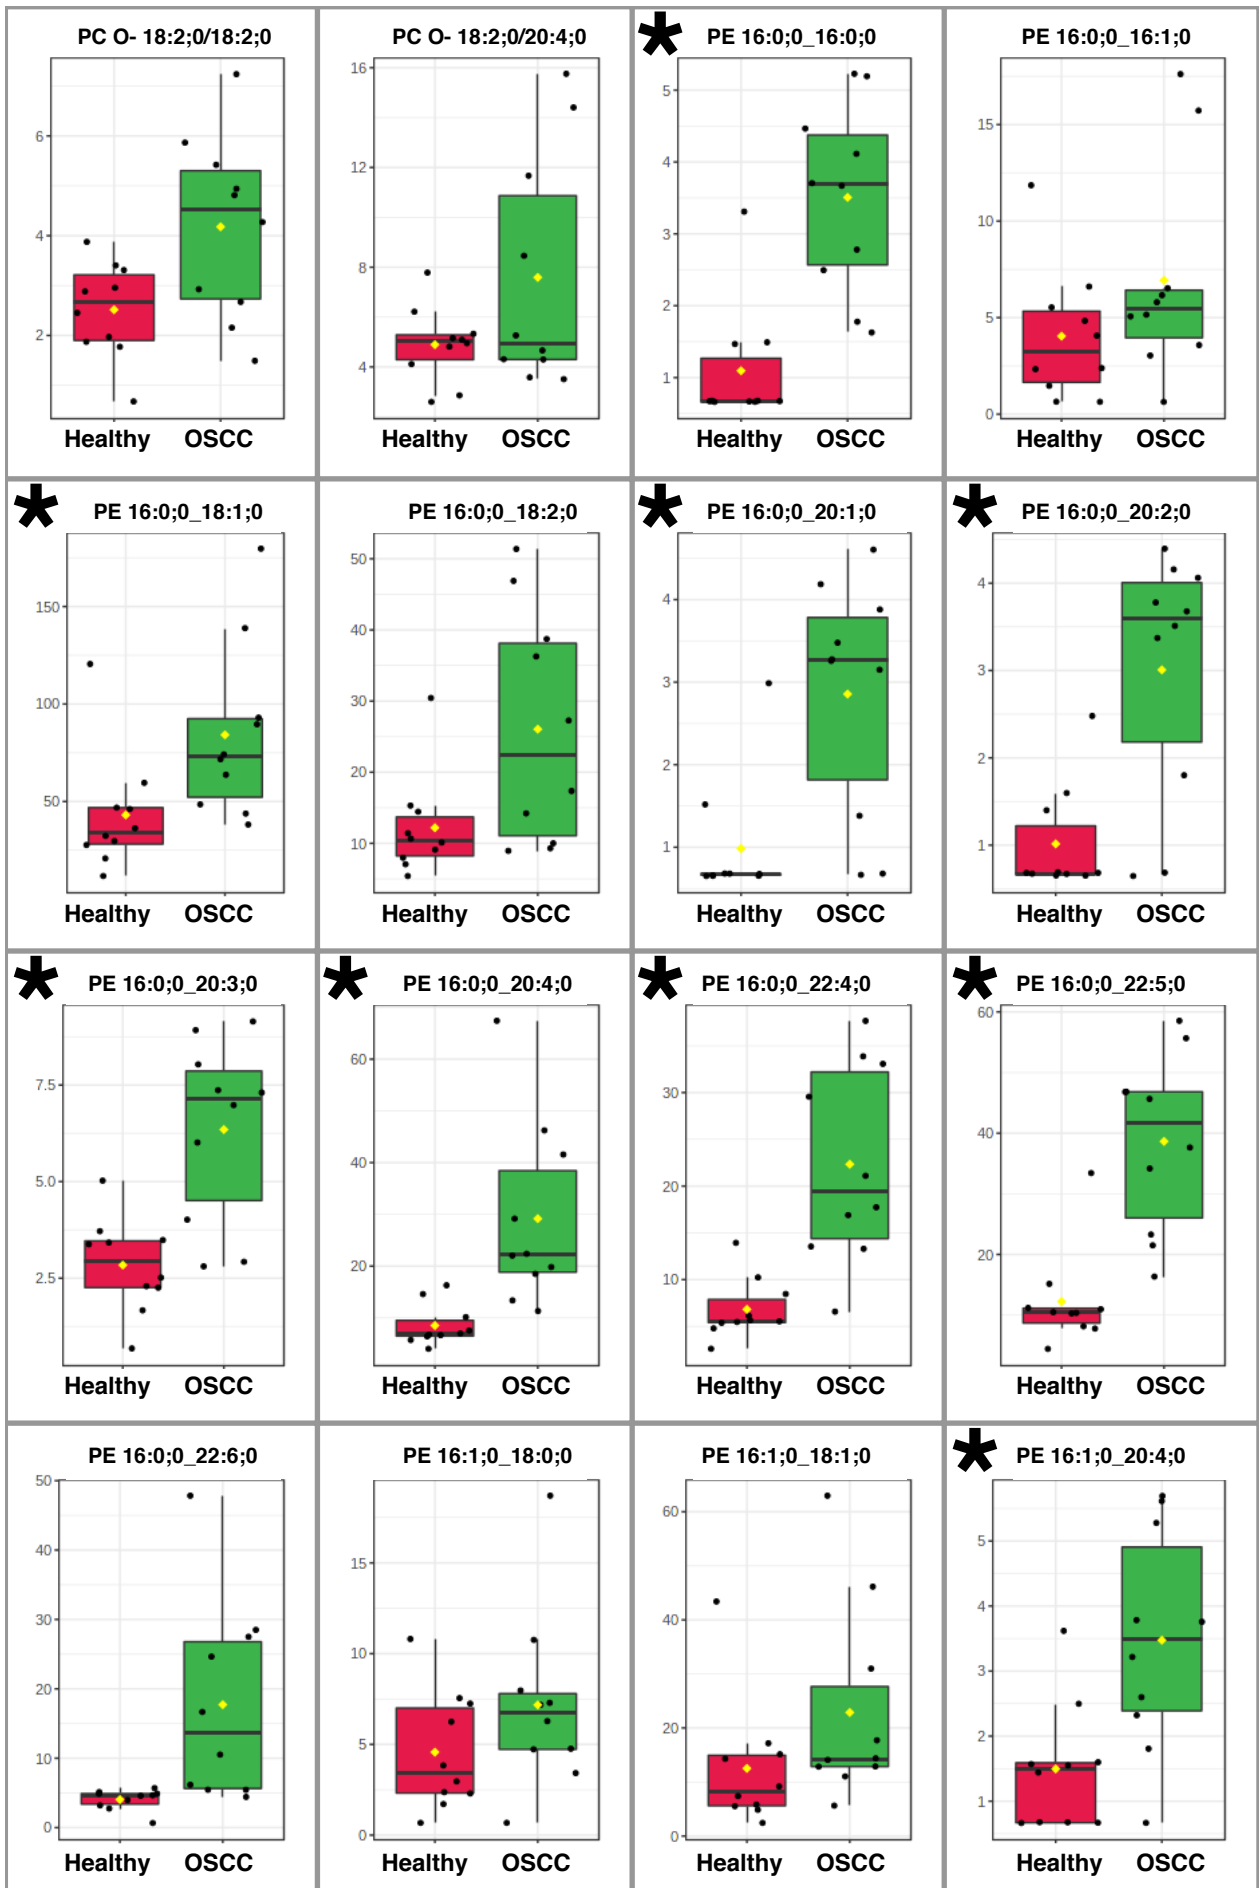

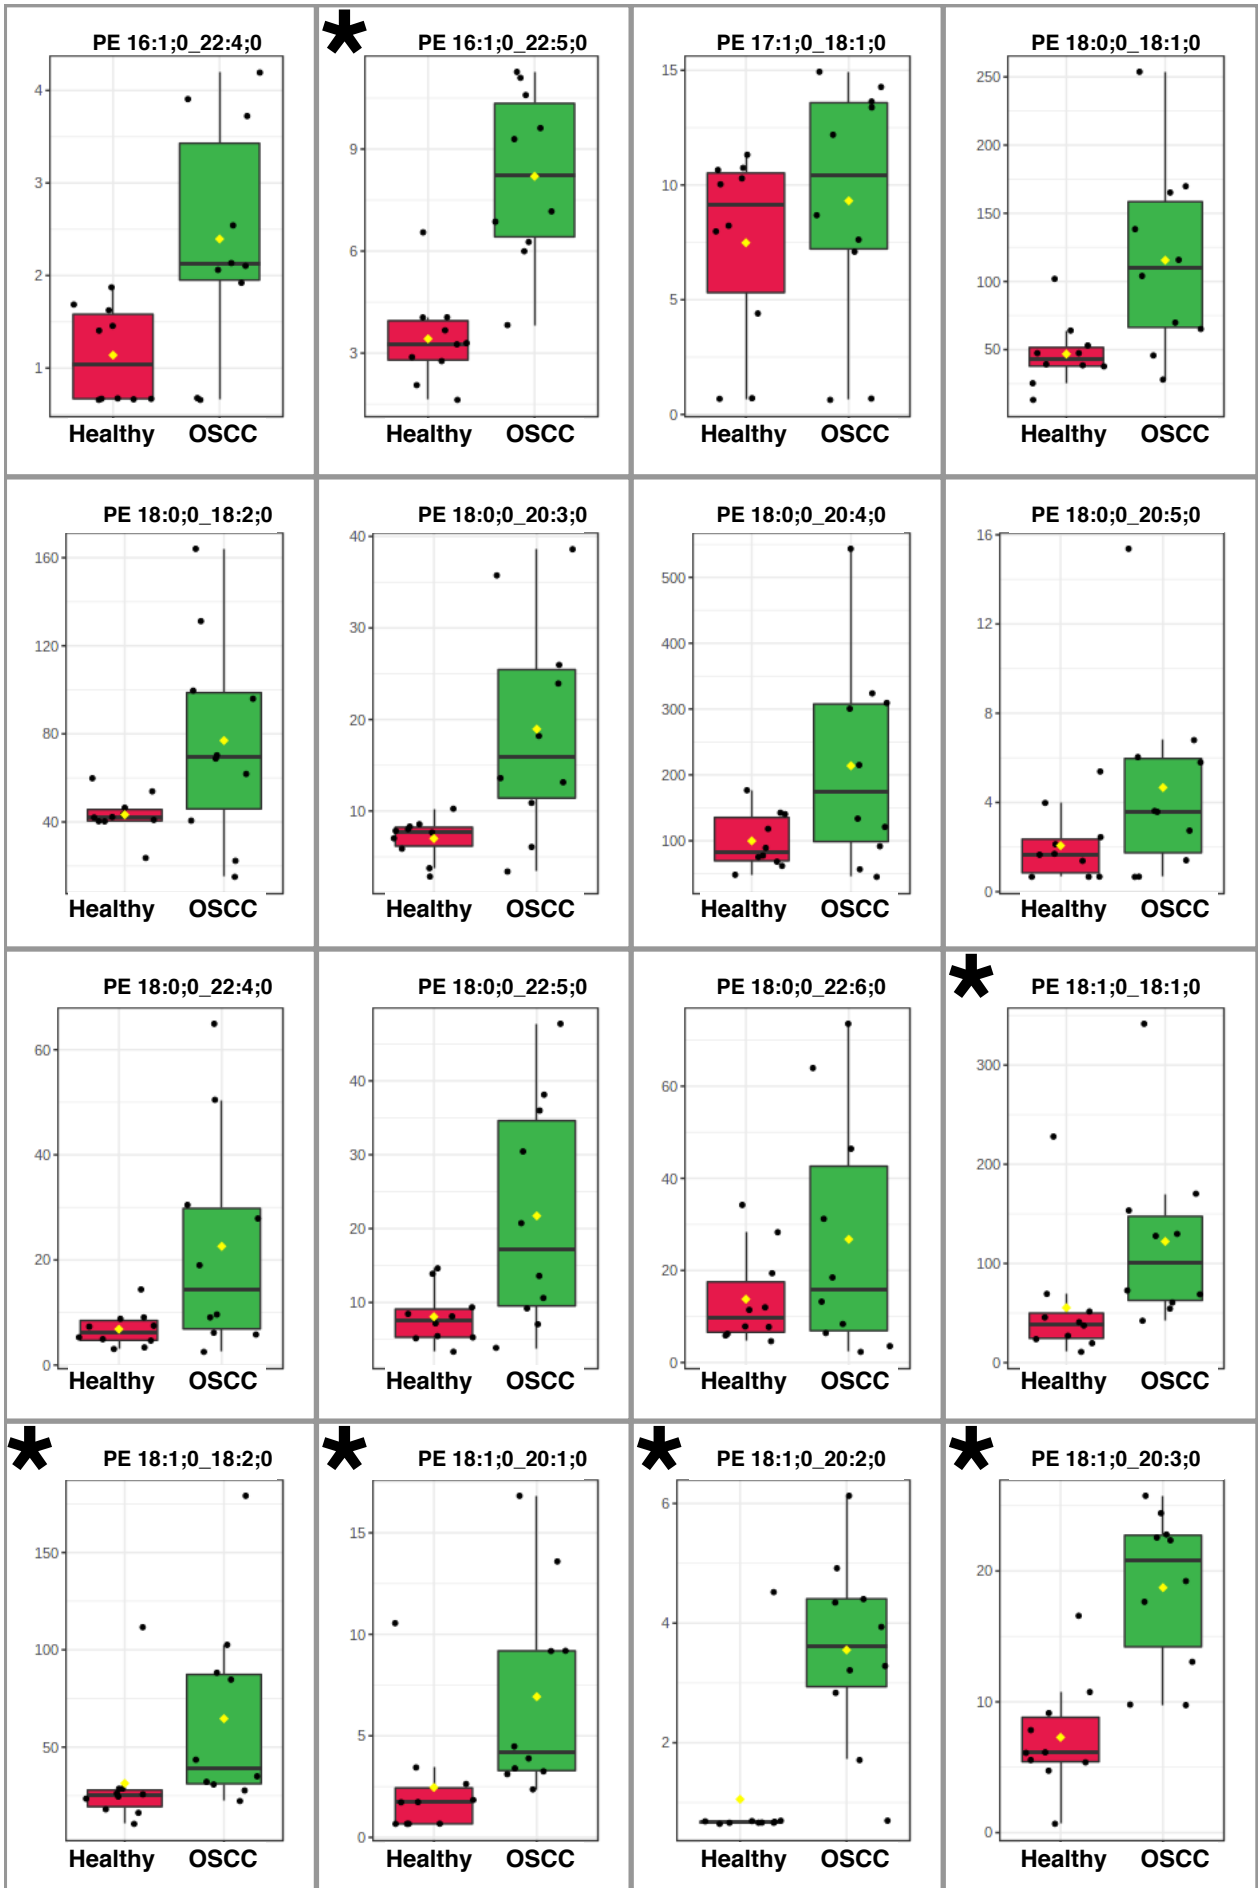

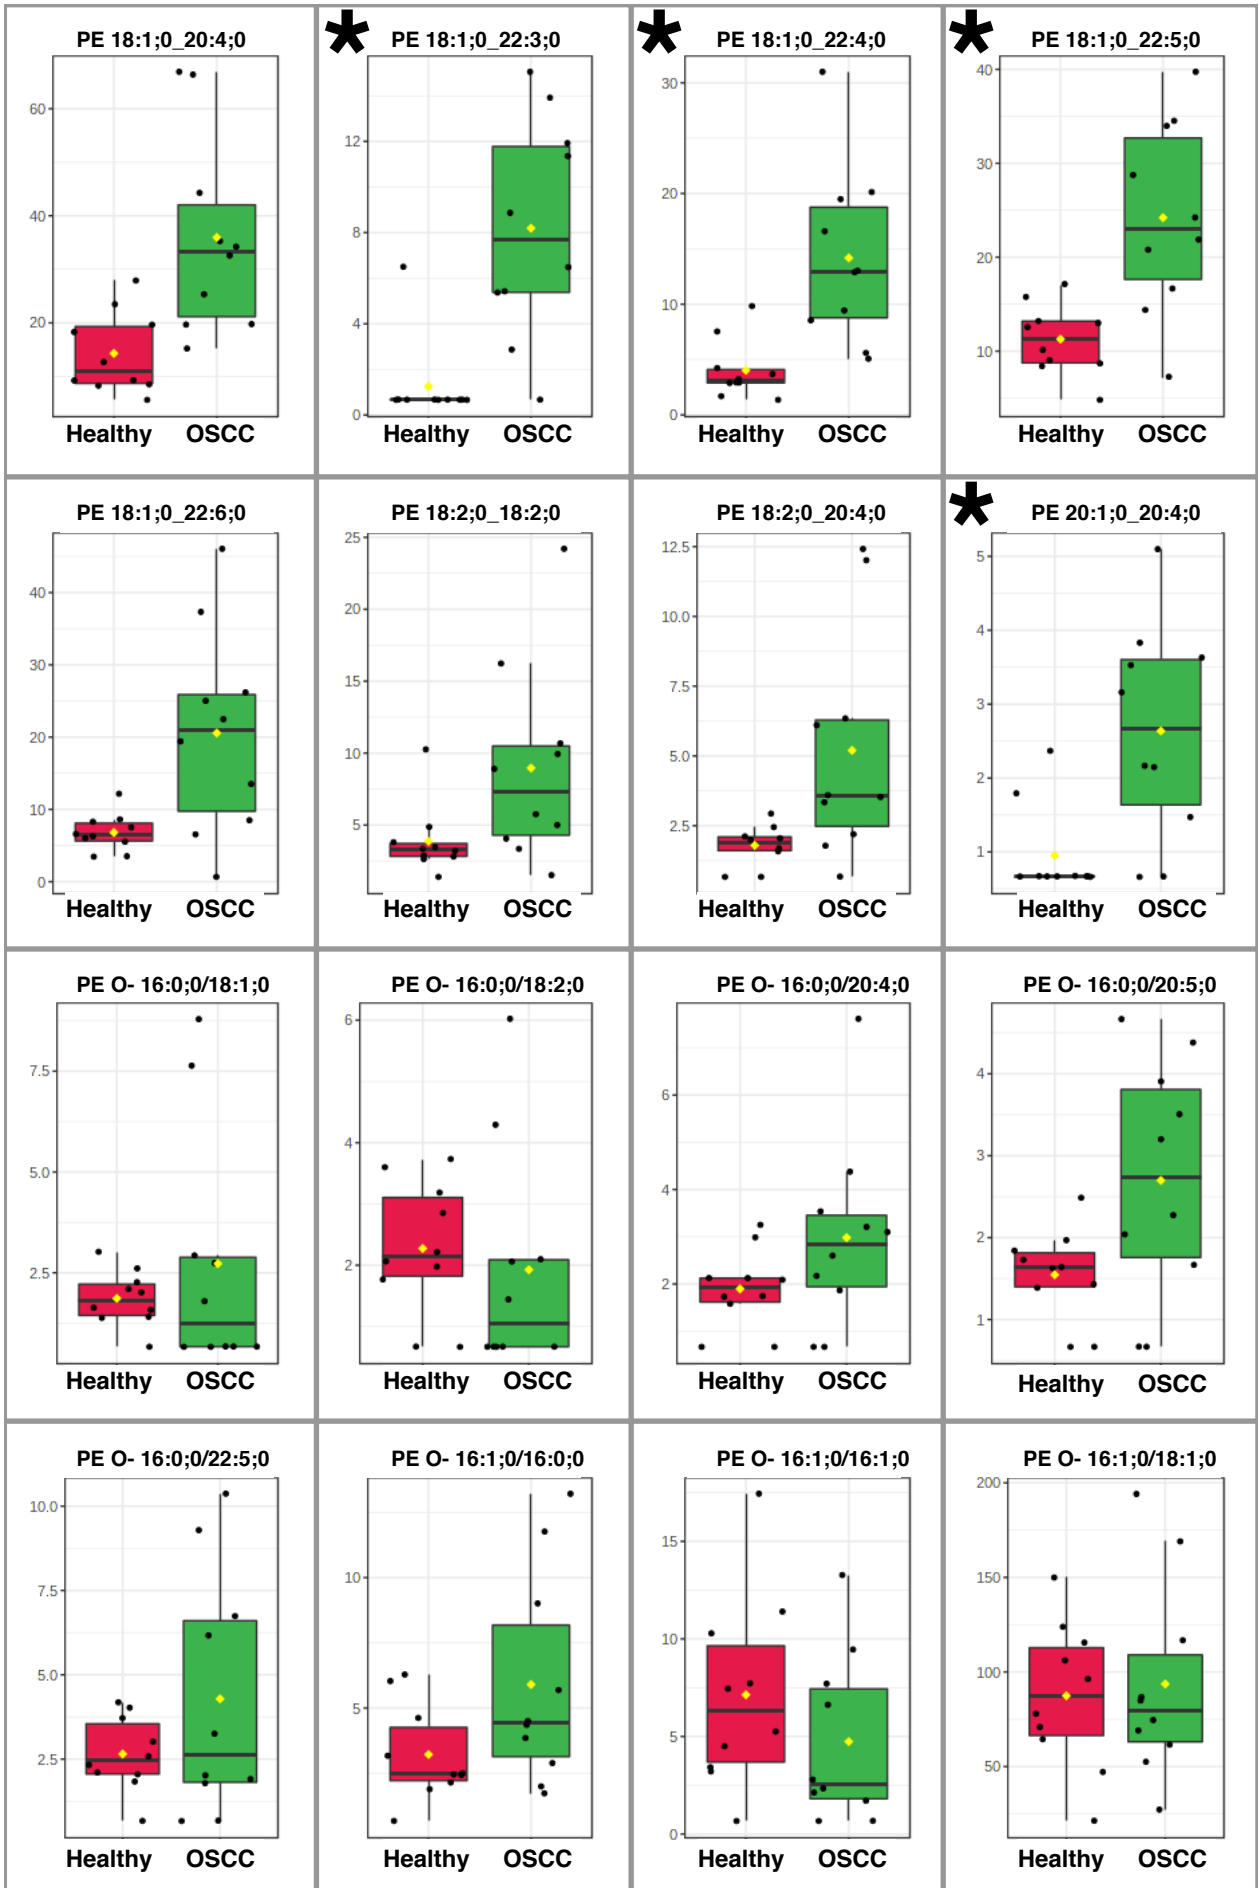

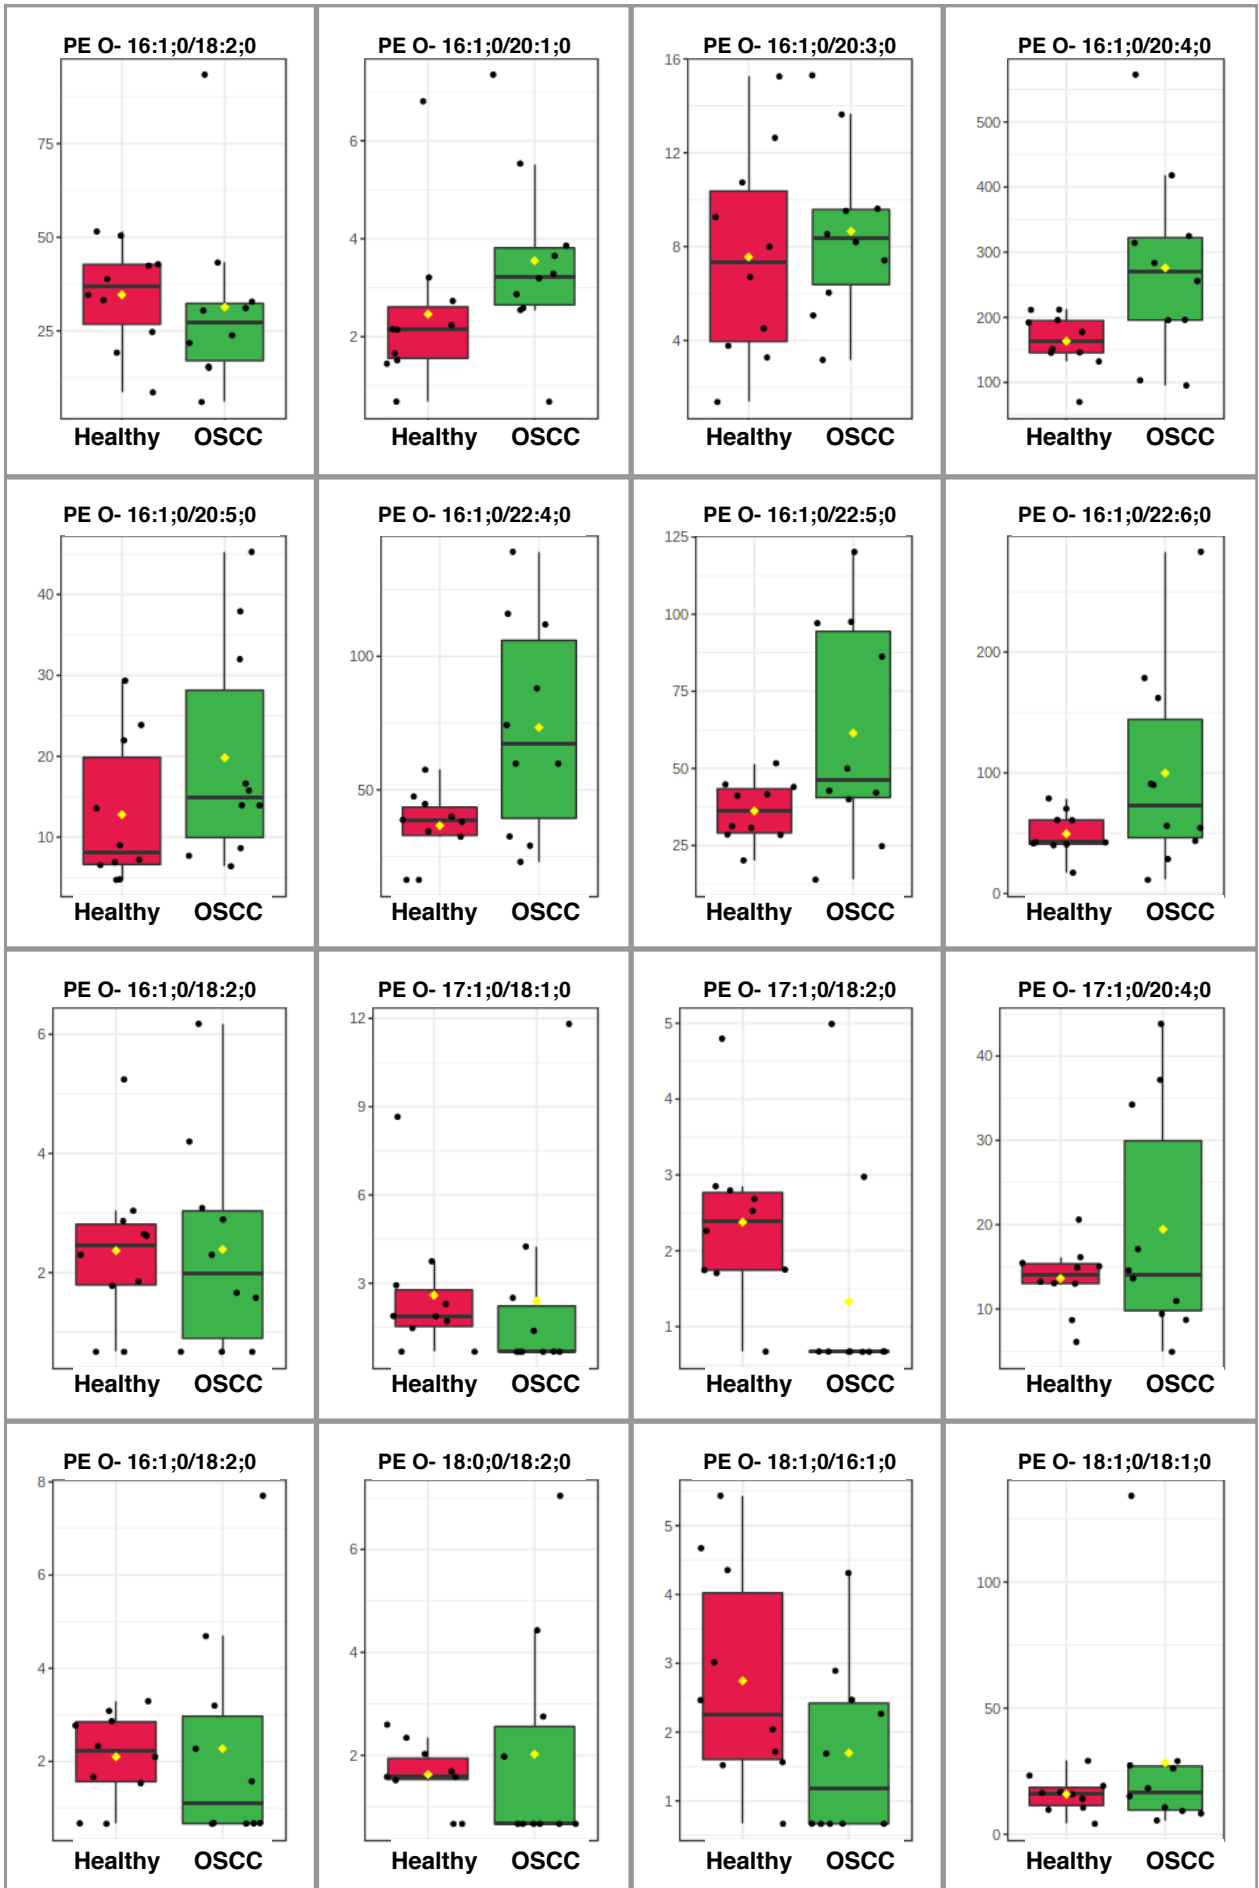

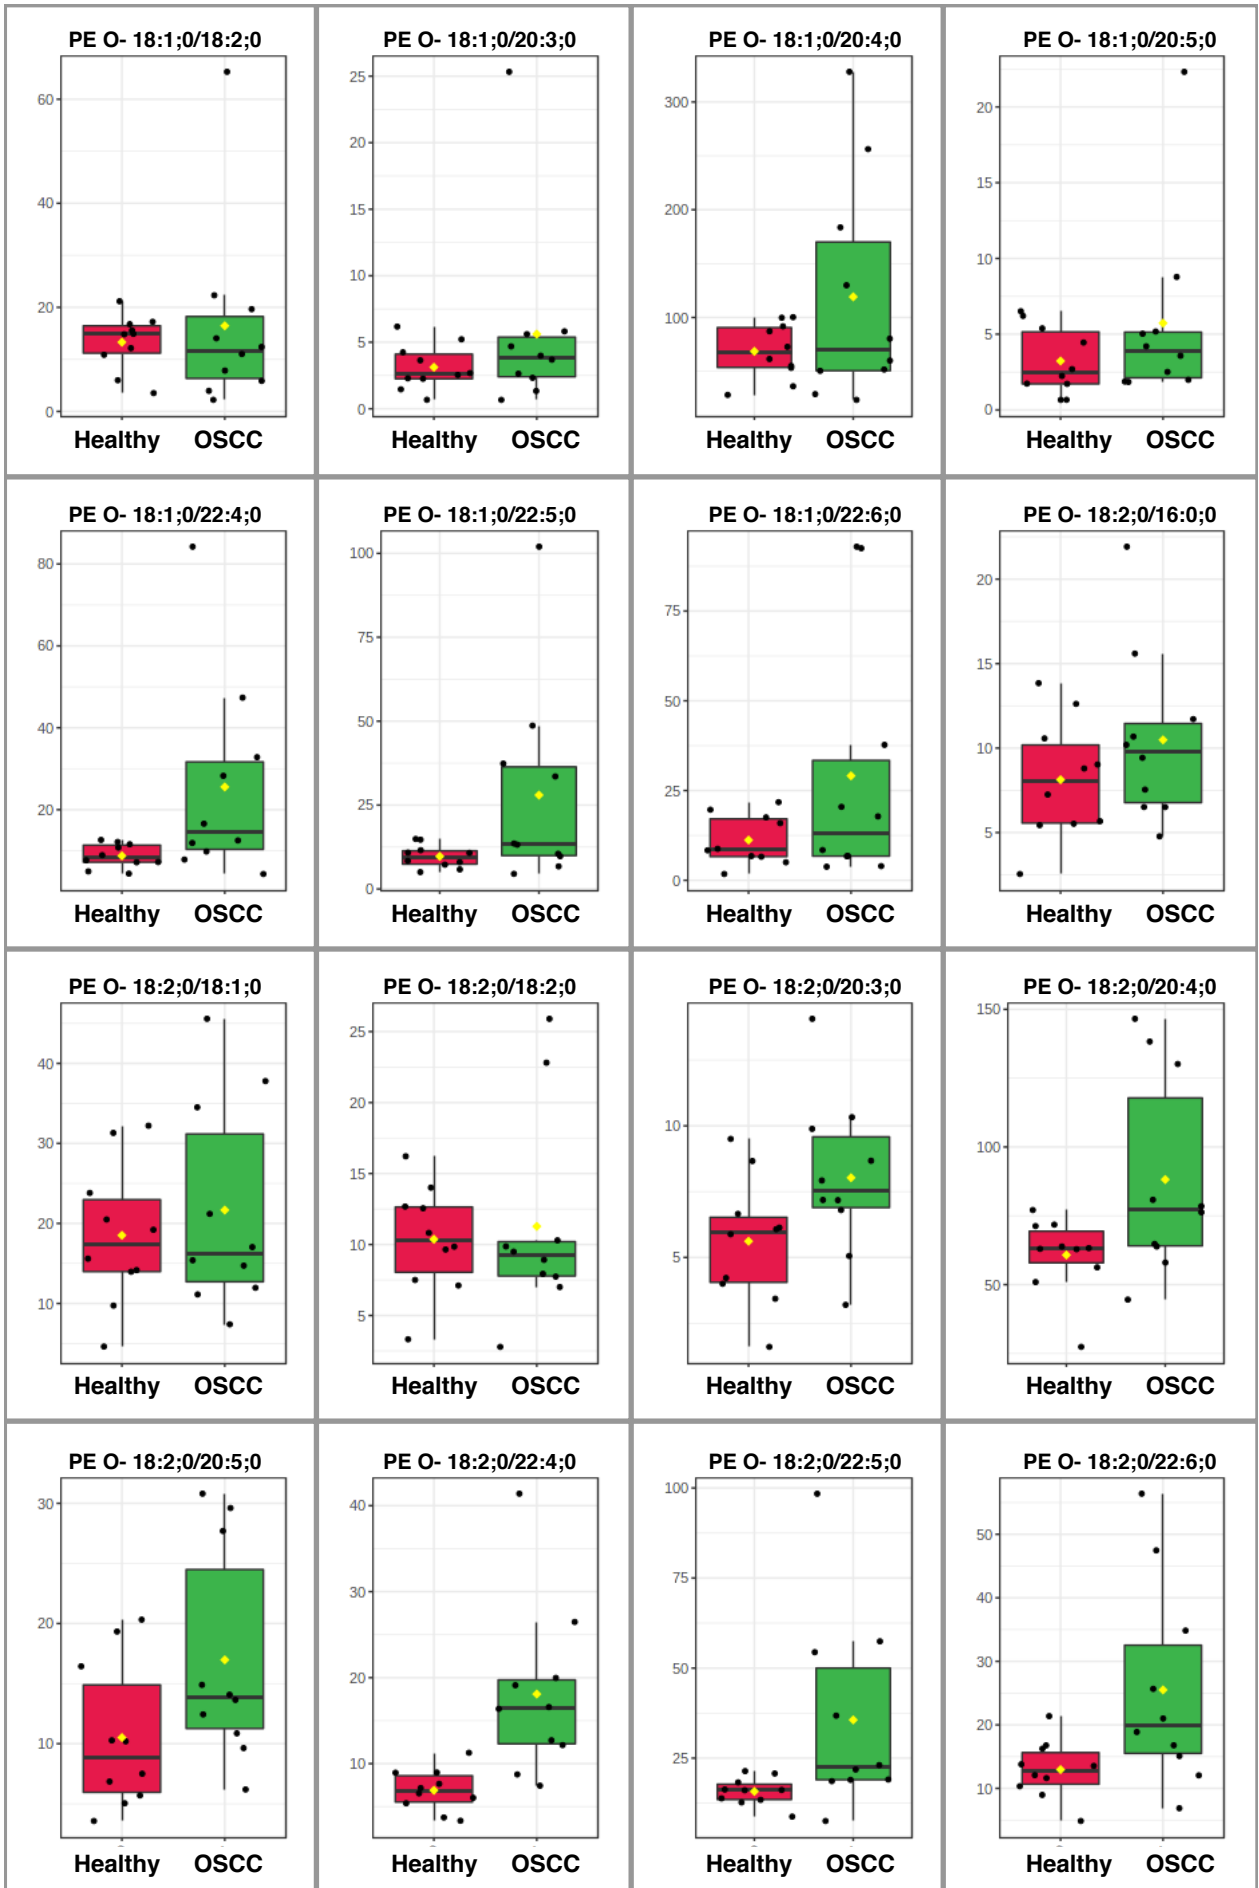

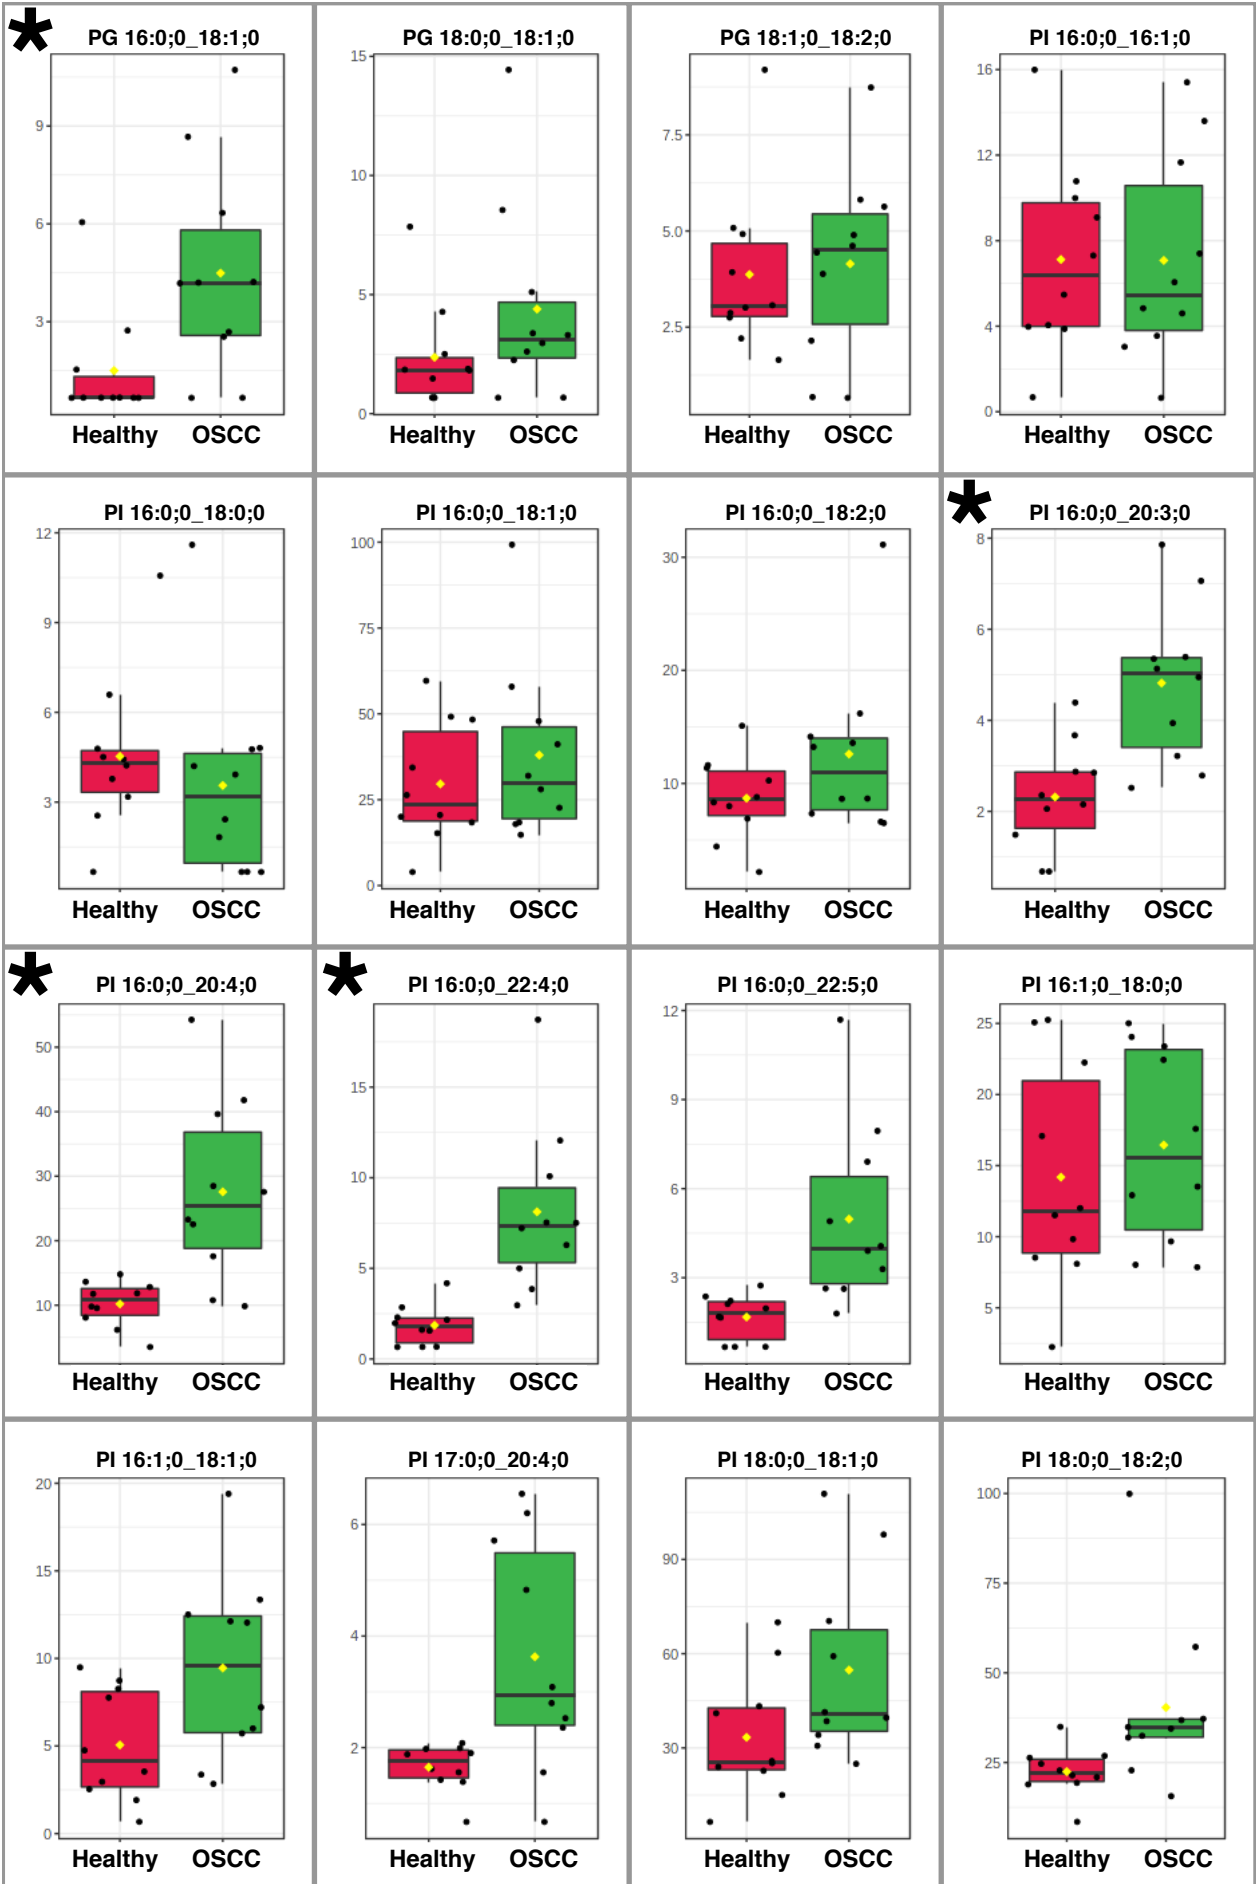



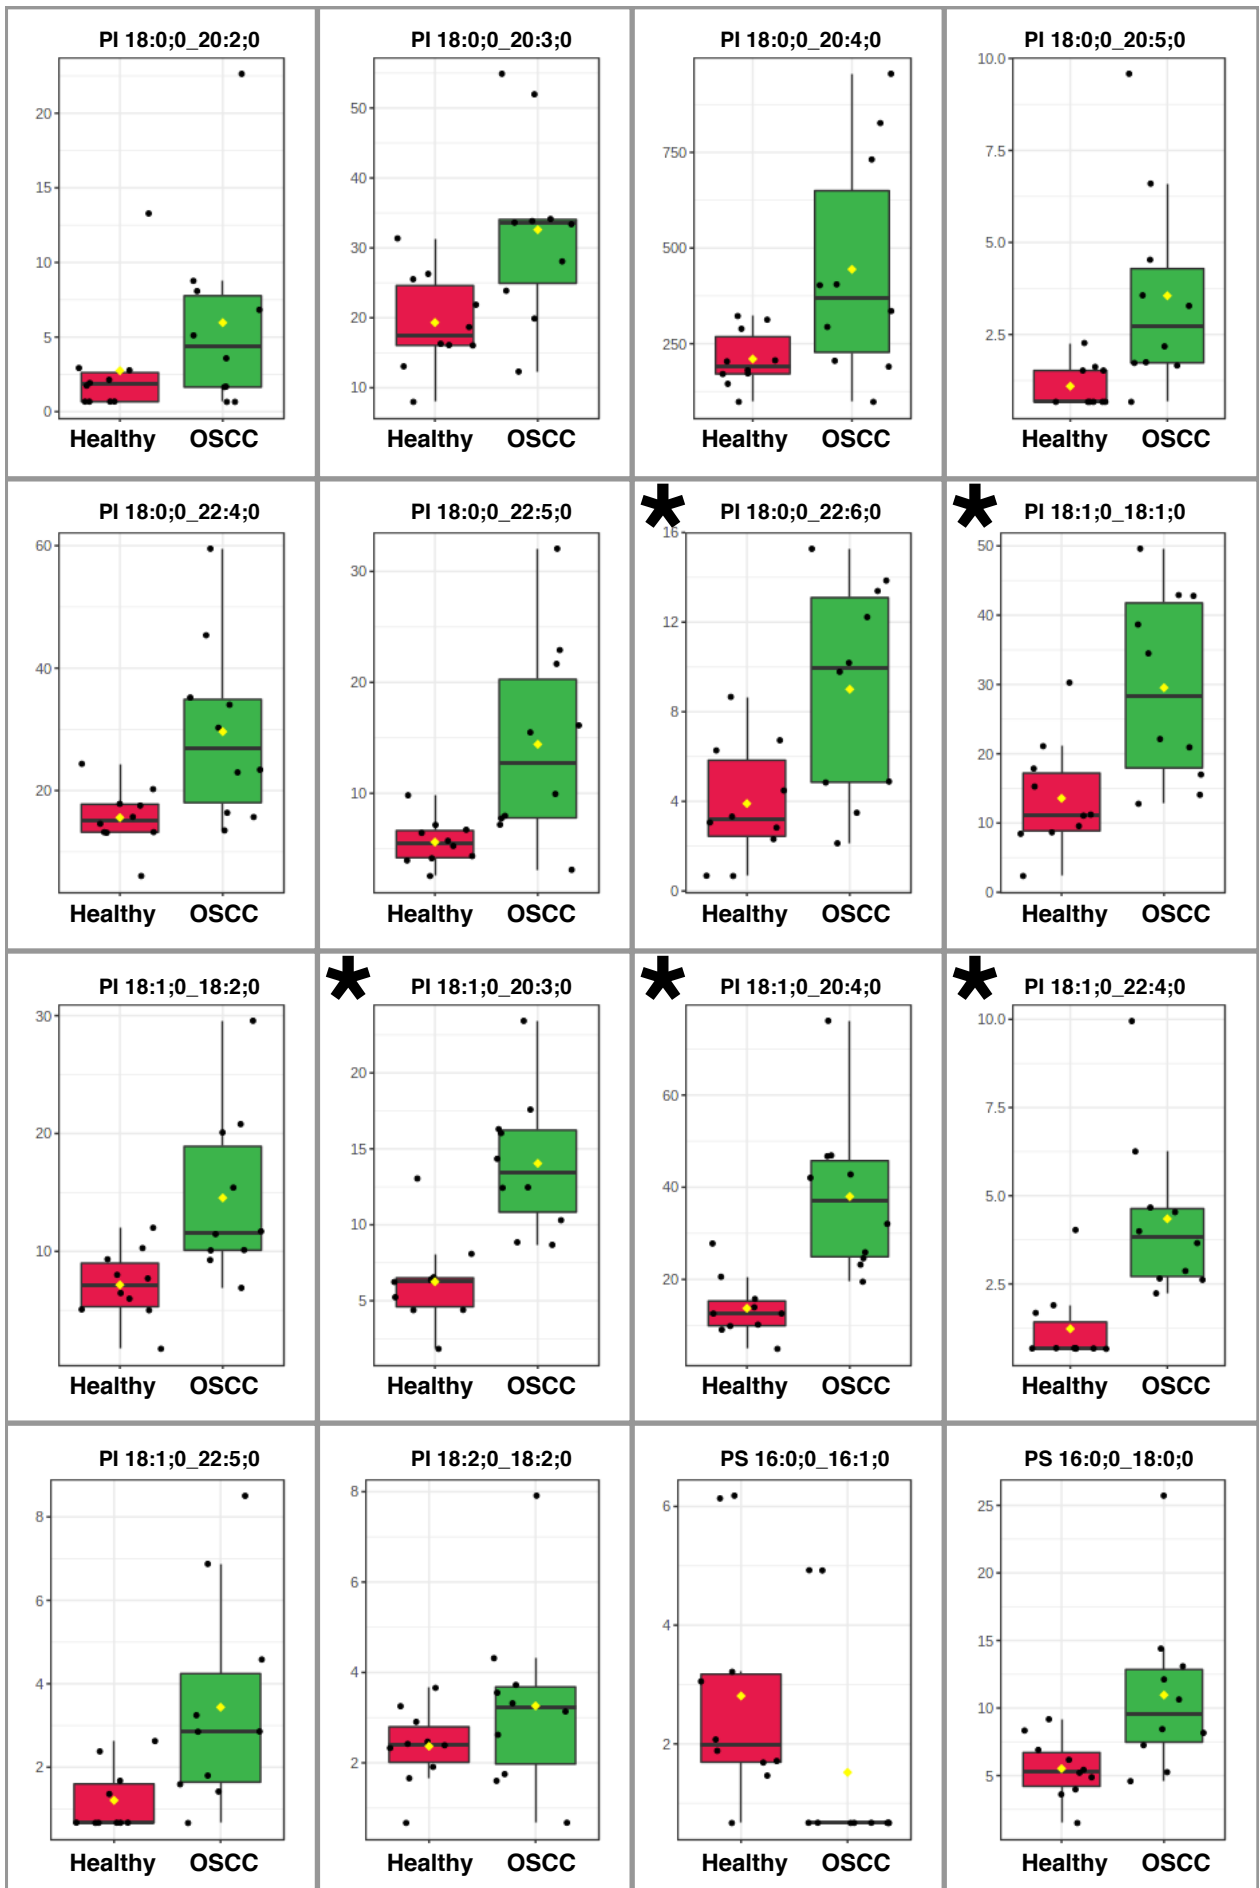

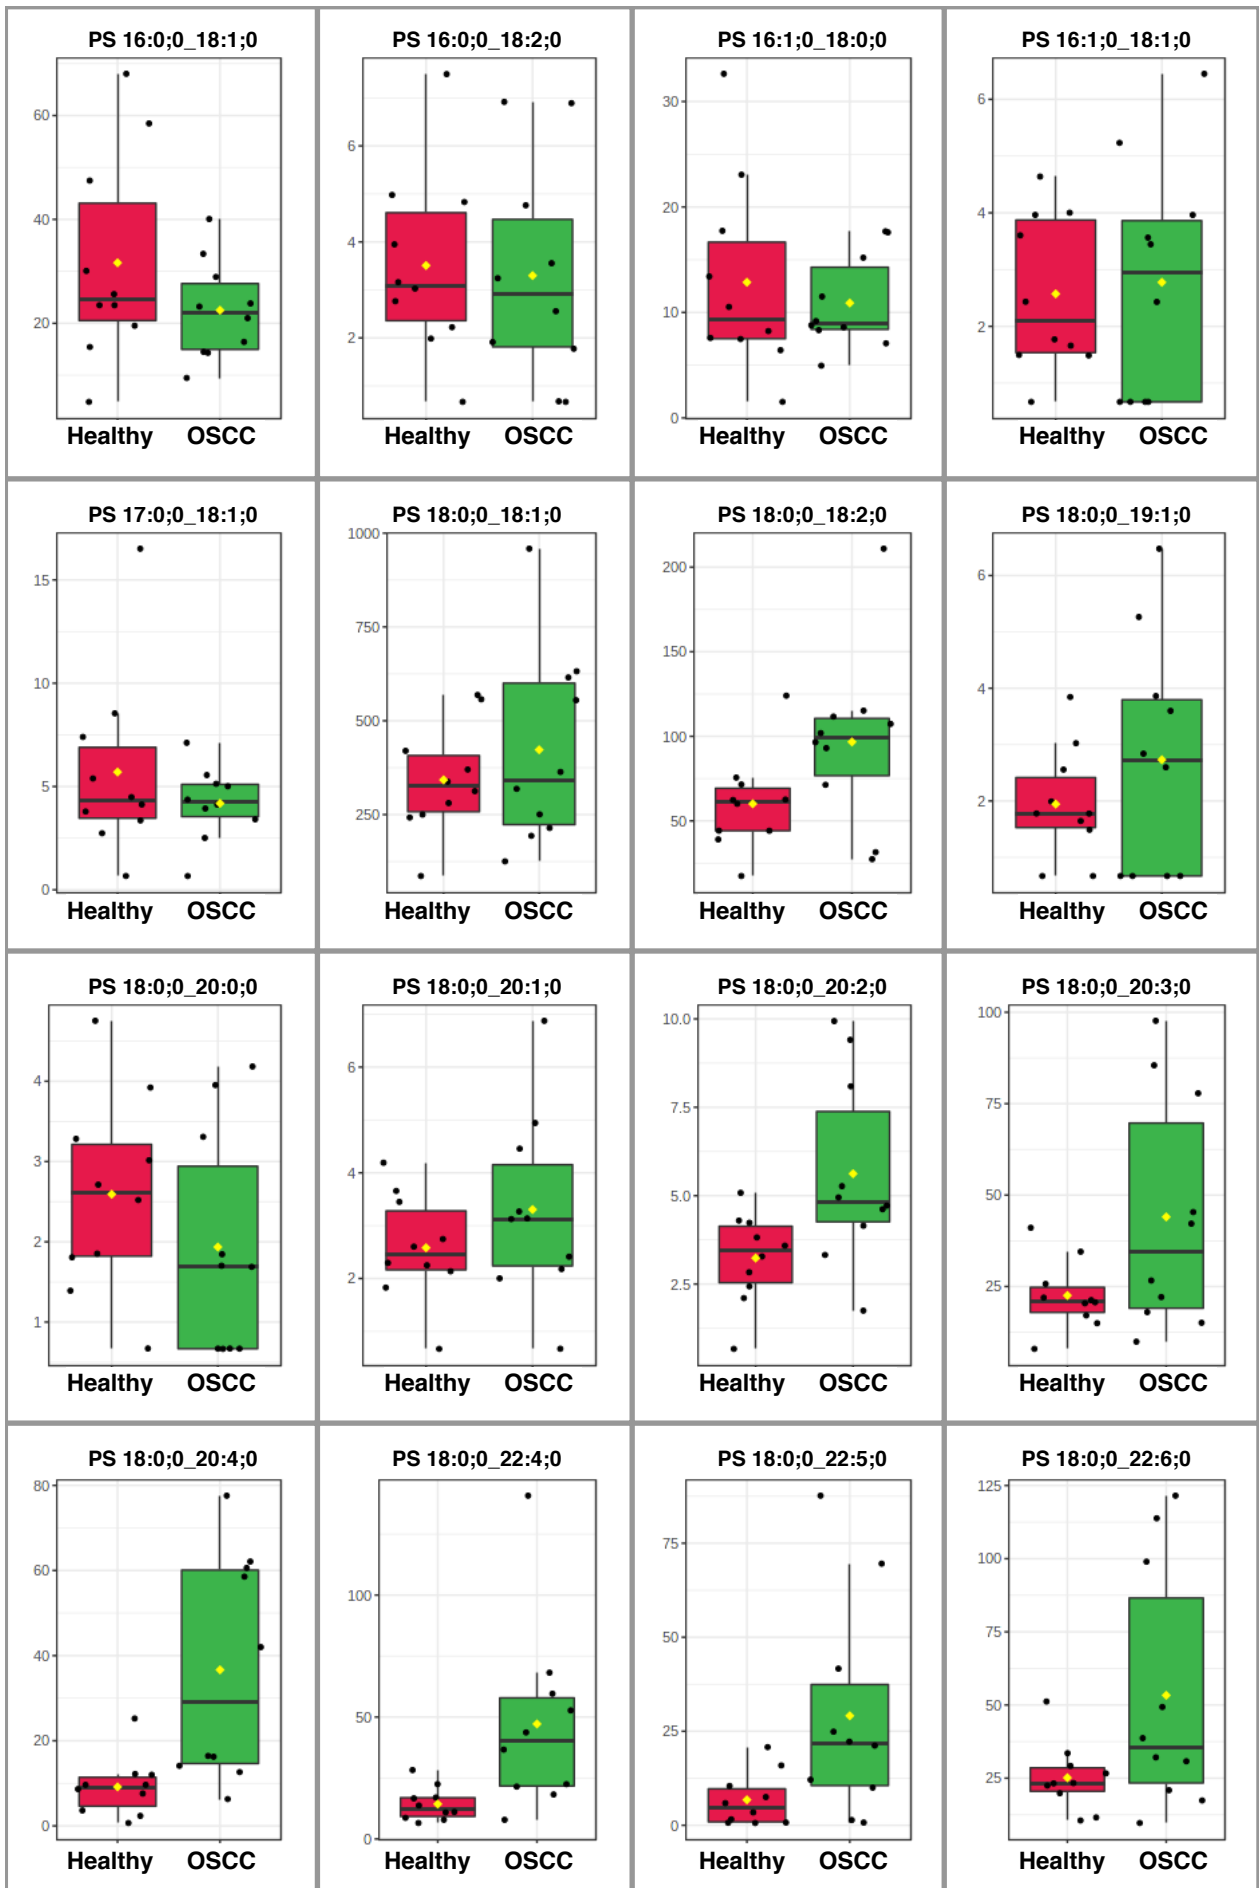

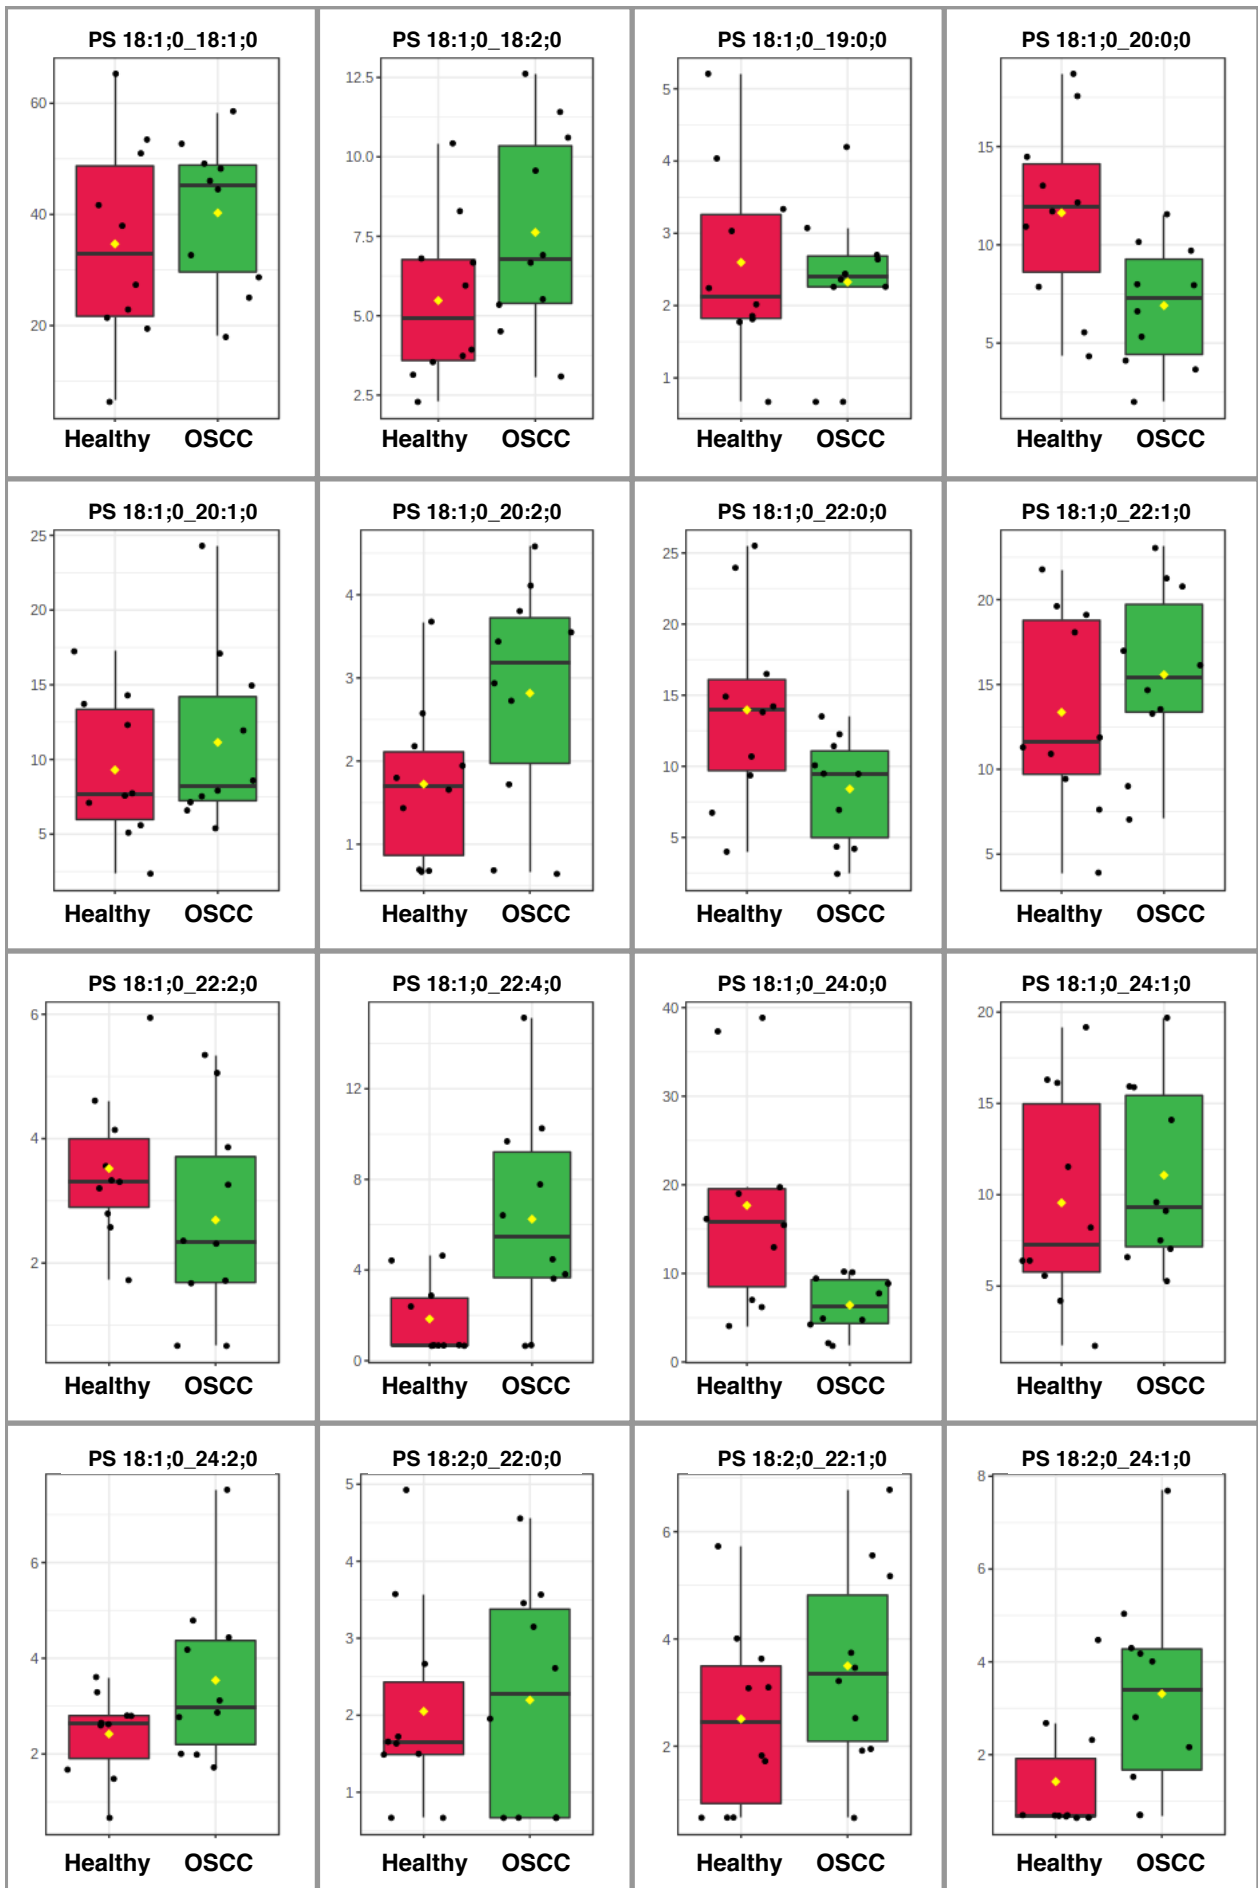

\*

SM 32:1;2

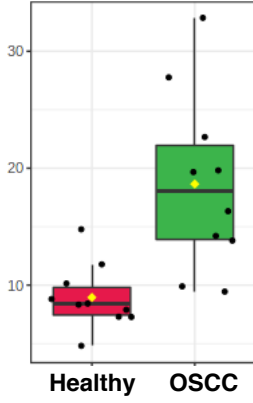

SM 34:0;2

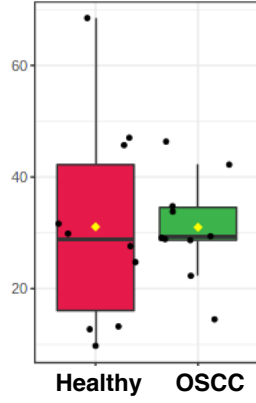

SM 34:1;2

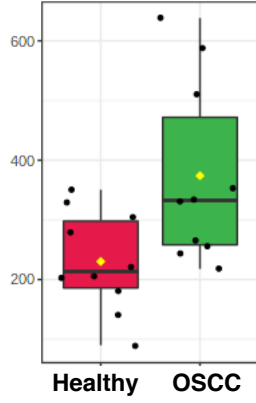

SM 34:1;3

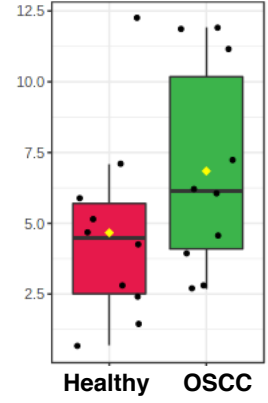

SM 34:2;2

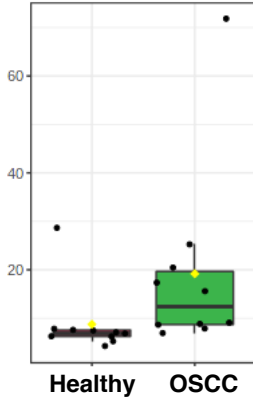

SM 36:0;2

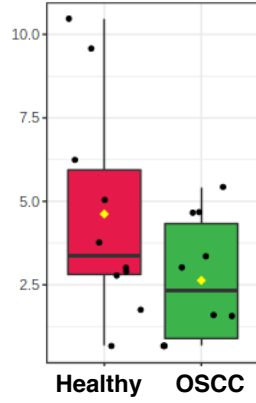

SM 36:1;2

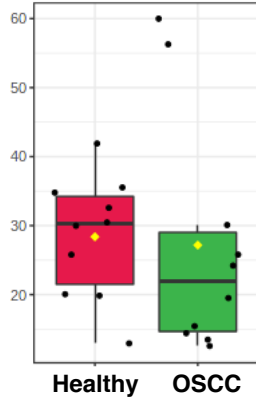

SM 36:2;2

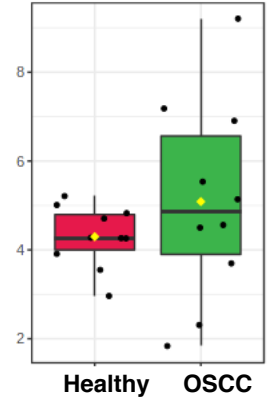

SM 38:1;2

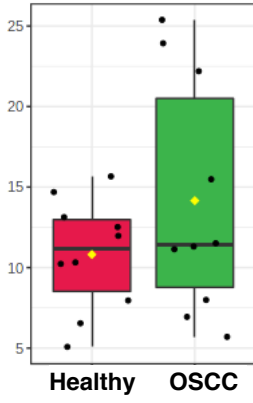

SM 40:1;2

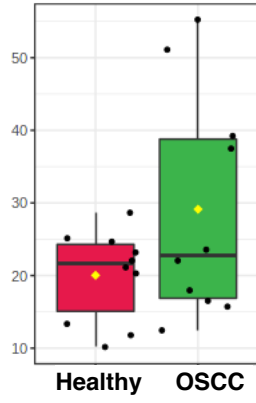

\*

SM 40:2;2

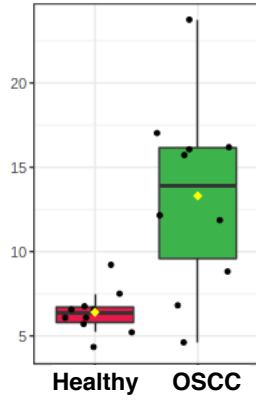

SM 42:1;2

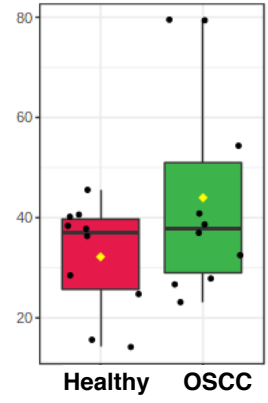

SM 42:2;2

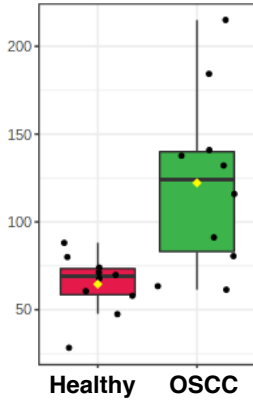

\*

SM 44:2;2

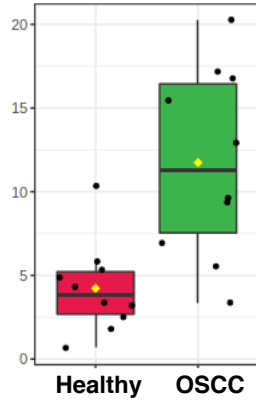

TAG 44:1;0

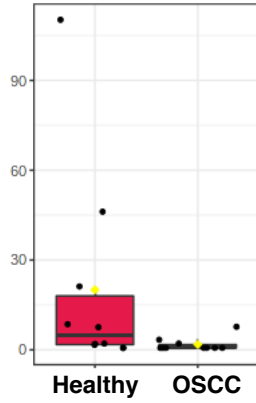

TAG 46:1;0

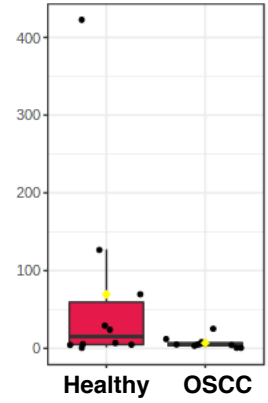

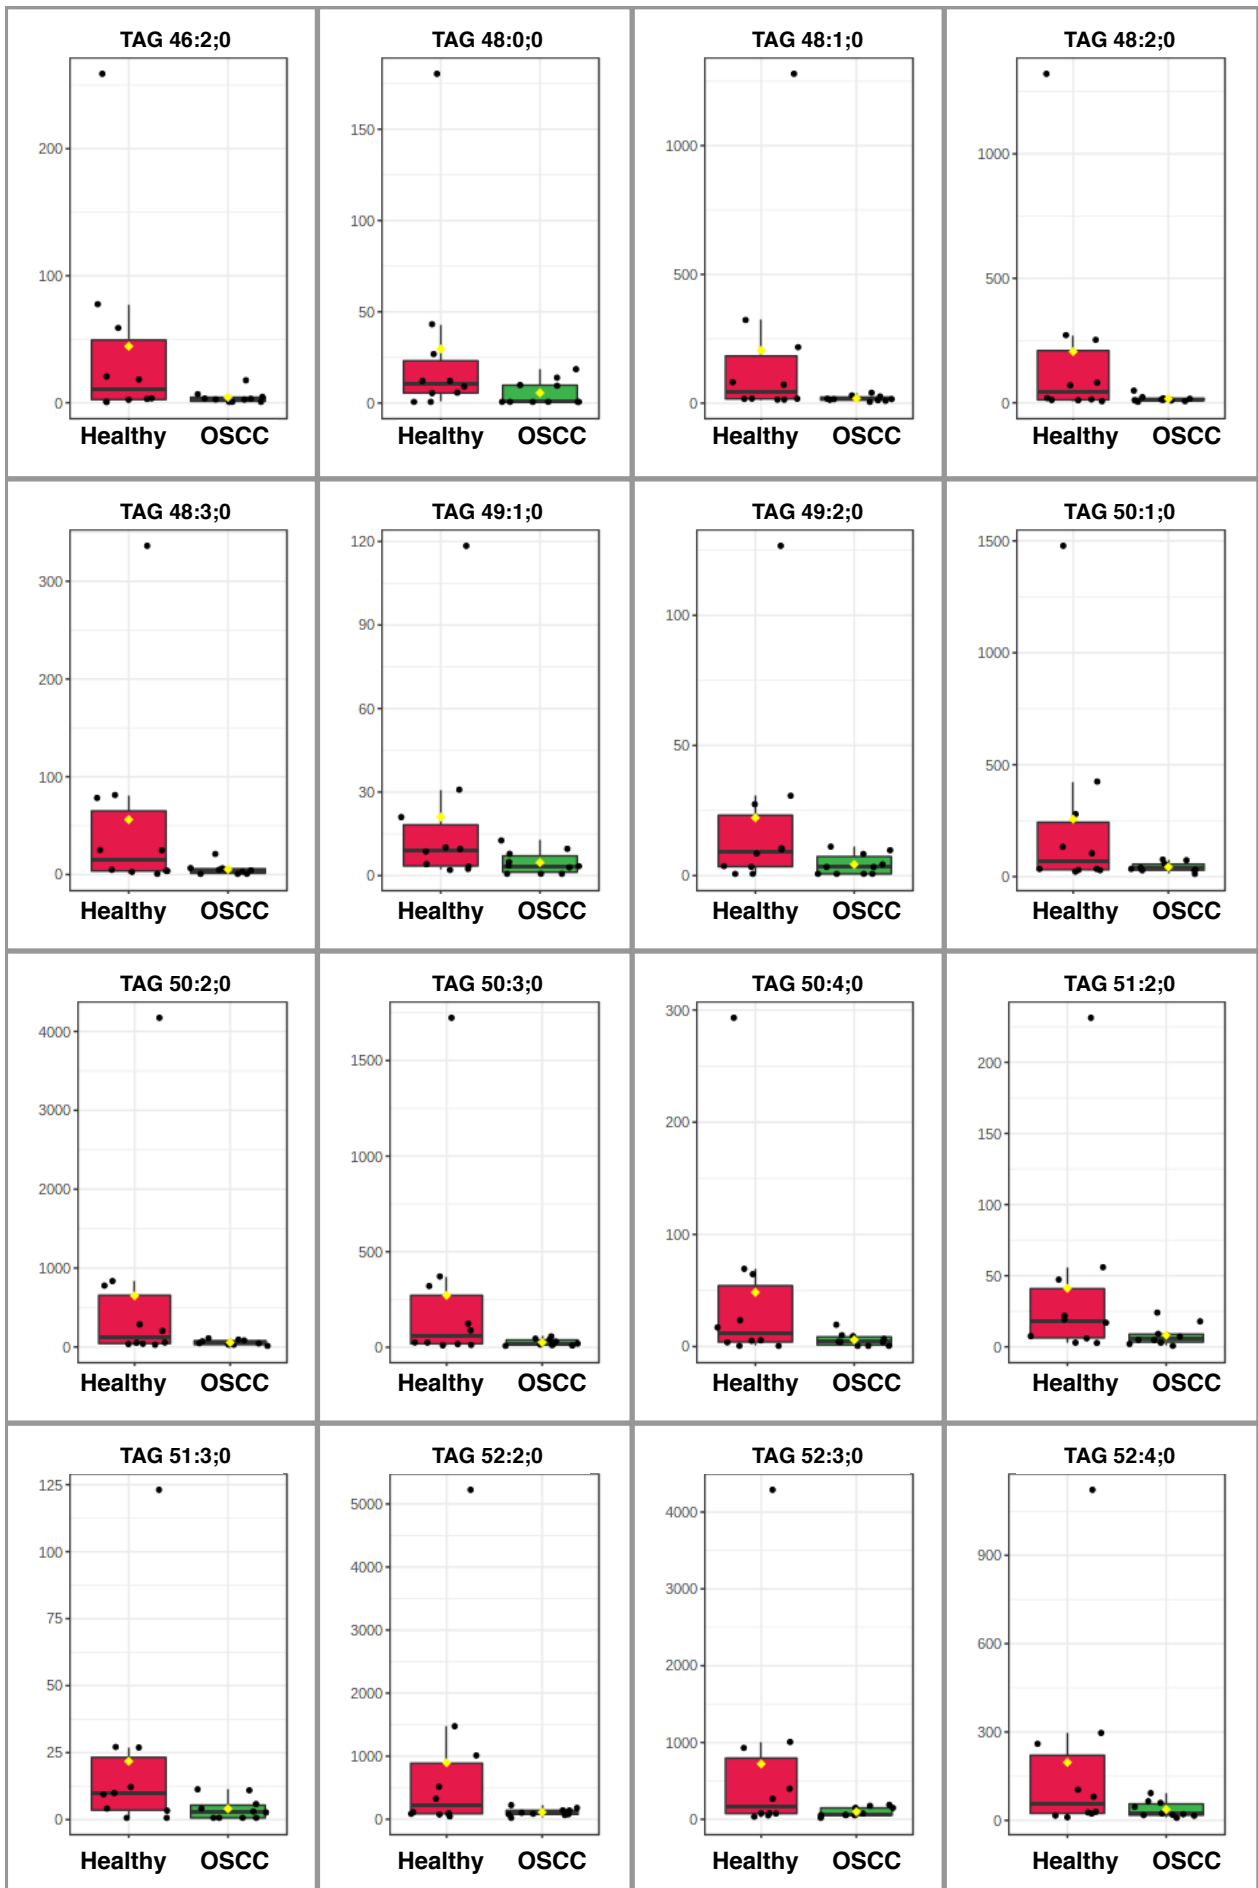

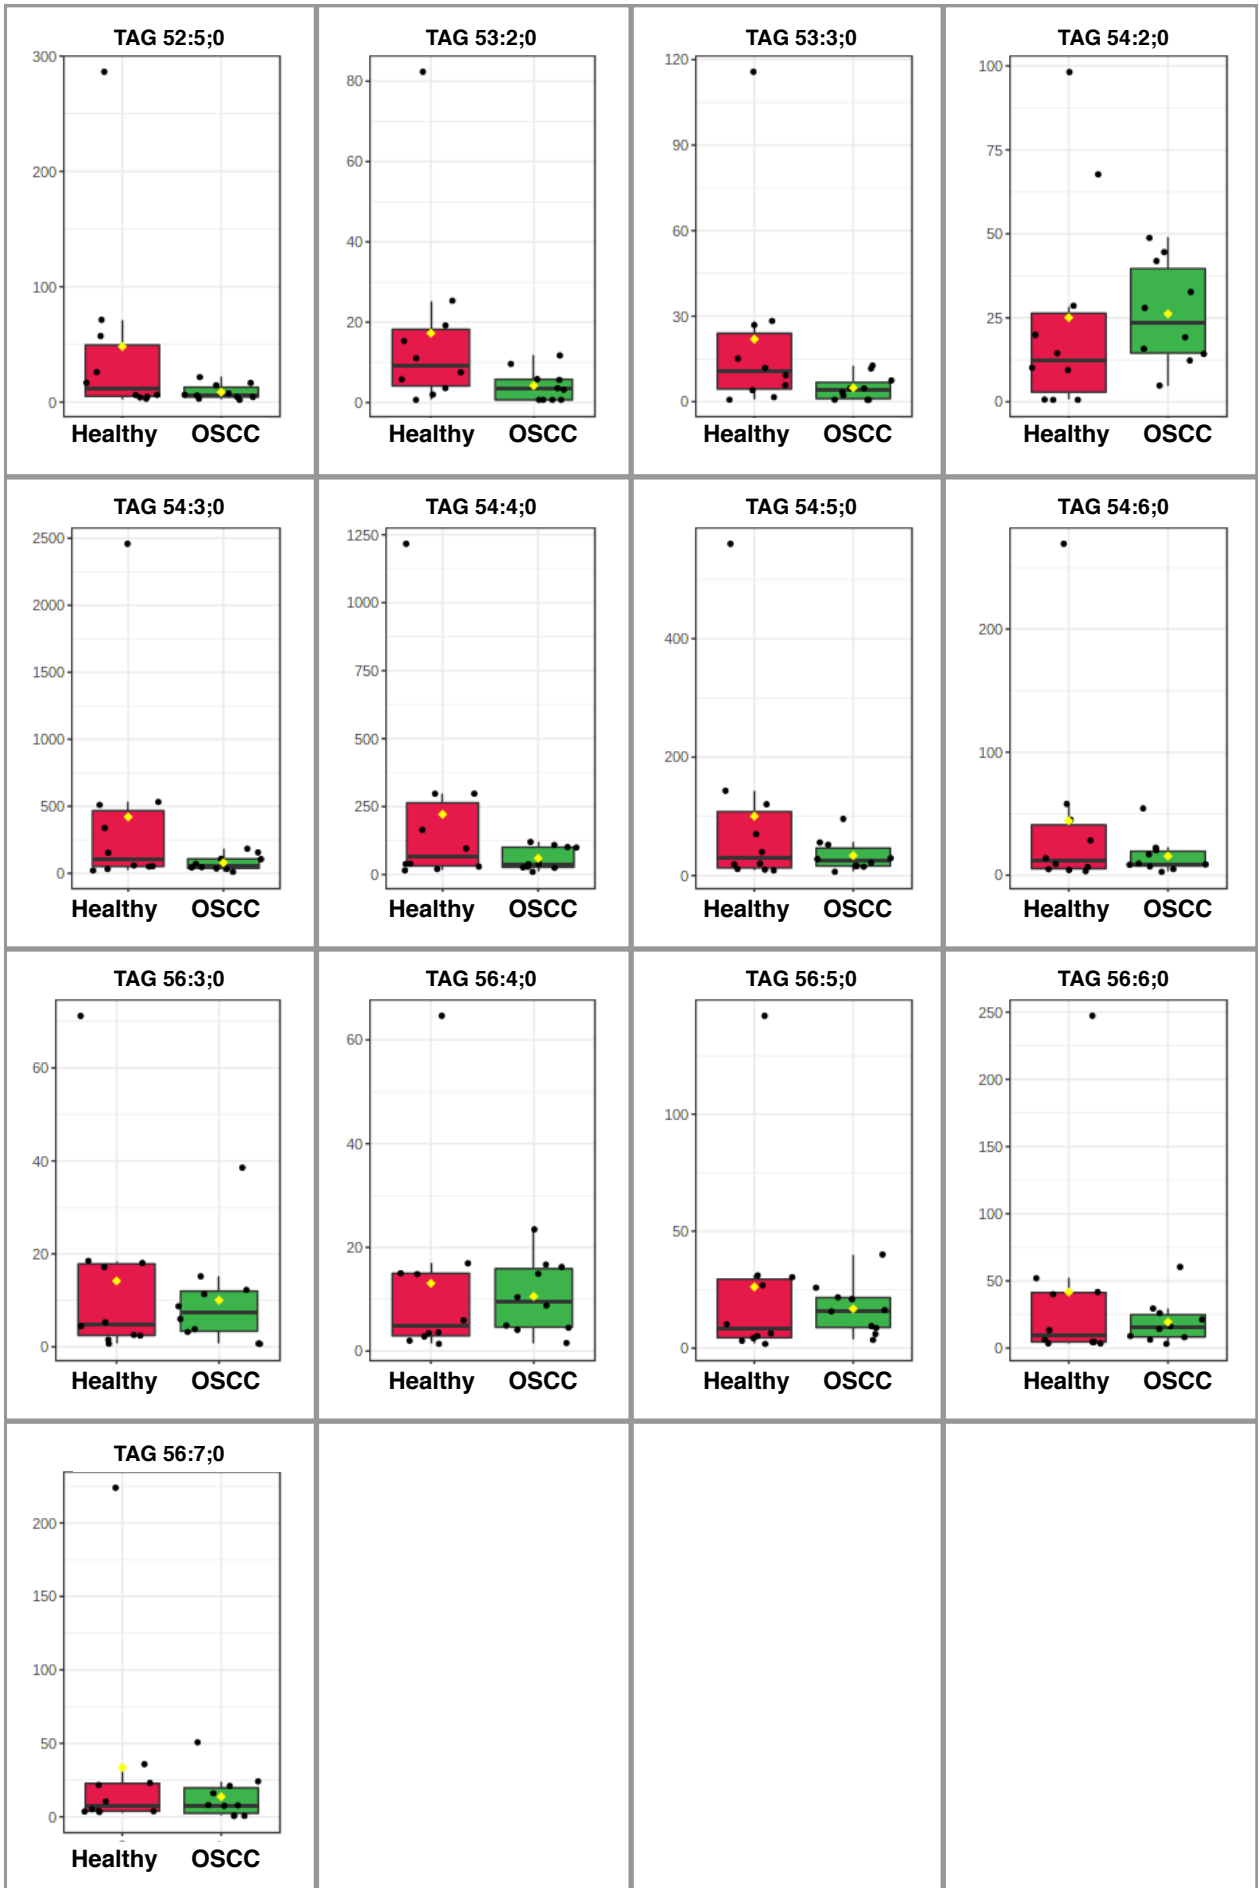

Supplement: mmc9.pdf [file mmc9.pdf]
